# Supplementary material for: Discovery of ianthelliformisamines D–G from the sponge Suberea ianthelliformis and the total synthesis of ianthelliformisamine D
Source: publisher site journal article supplement (doi:10.3762/bjoc.20.266), 2024-12-09
Supplement: Additional file 1 [file 1860-5397-20-266-S1.pdf]

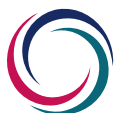

## Supporting Information

for

### **Discovery of ianthelliformisamines D–G from the sponge *Suberea ianthelliformis* and the total synthesis of ianthelliformisamine D**

Sasha Hayes, Yaoying Lu, Bernd H. A. Rehm and Rohan A. Davis

*Beilstein J. Org. Chem.* **2024**, *20*, 3205–3214. [doi:10.3762/bjoc.20.266](https://doi.org/10.3762/bjoc.20.266)

**NMR data tables for compounds 4–7, 1D and 2D NMR spectra of compounds 4–7,  $^1\text{H}$  NMR spectra of natural products 1–3 and 8 and  $^1\text{H}$  and  $^{13}\text{C}$  NMR spectra of synthetic compounds 4, 9, and 10**

**Table of contents:**

|                   |                                                                                                              |
|-------------------|--------------------------------------------------------------------------------------------------------------|
| <b>Table S1</b>   | NMR data table for ianthelliformisamine D ( <b>4</b> ) in DMSO- <i>d</i> <sub>6</sub>                        |
| <b>Figure S1</b>  | <sup>1</sup> H NMR (800 MHz) spectrum of ianthelliformisamine D ( <b>4</b> ) in DMSO- <i>d</i> <sub>6</sub>  |
| <b>Figure S2</b>  | <sup>13</sup> C NMR (200 MHz) spectrum of ianthelliformisamine D ( <b>4</b> ) in DMSO- <i>d</i> <sub>6</sub> |
| <b>Figure S3</b>  | HSQC spectrum of ianthelliformisamine D ( <b>4</b> ) in DMSO- <i>d</i> <sub>6</sub>                          |
| <b>Figure S4</b>  | HMBC spectrum of ianthelliformisamine D ( <b>4</b> ) in DMSO- <i>d</i> <sub>6</sub>                          |
| <b>Figure S5</b>  | COSY spectrum of ianthelliformisamine D ( <b>4</b> ) in DMSO- <i>d</i> <sub>6</sub>                          |
| <b>Figure S6</b>  | ROESY spectrum of ianthelliformisamine D ( <b>4</b> ) in DMSO- <i>d</i> <sub>6</sub>                         |
| <b>Table S2</b>   | NMR data table for ianthelliformisamine E ( <b>5</b> ) in DMSO- <i>d</i> <sub>6</sub>                        |
| <b>Figure S7</b>  | <sup>1</sup> H NMR (800 MHz) spectrum of ianthelliformisamine E ( <b>5</b> ) in DMSO- <i>d</i> <sub>6</sub>  |
| <b>Figure S8</b>  | <sup>13</sup> C NMR (200 MHz) spectrum of ianthelliformisamine E ( <b>5</b> ) in DMSO- <i>d</i> <sub>6</sub> |
| <b>Figure S9</b>  | HSQC spectrum of ianthelliformisamine E ( <b>5</b> ) in DMSO- <i>d</i> <sub>6</sub>                          |
| <b>Figure S10</b> | HMBC spectrum of ianthelliformisamine E ( <b>5</b> ) in DMSO- <i>d</i> <sub>6</sub>                          |
| <b>Figure S11</b> | COSY spectrum of ianthelliformisamine E ( <b>5</b> ) in DMSO- <i>d</i> <sub>6</sub>                          |
| <b>Figure S12</b> | ROESY spectrum of ianthelliformisamine E ( <b>5</b> ) in DMSO- <i>d</i> <sub>6</sub>                         |
| <b>Table S3</b>   | NMR data table for ianthelliformisamine F ( <b>6</b> ) in DMSO- <i>d</i> <sub>6</sub>                        |
| <b>Figure S13</b> | <sup>1</sup> H NMR (800 MHz) spectrum of ianthelliformisamine F ( <b>6</b> ) in DMSO- <i>d</i> <sub>6</sub>  |
| <b>Figure S14</b> | <sup>13</sup> C NMR (200 MHz) spectrum of ianthelliformisamine F ( <b>6</b> ) in DMSO- <i>d</i> <sub>6</sub> |
| <b>Figure S15</b> | HSQC spectrum of ianthelliformisamine F ( <b>6</b> ) in DMSO- <i>d</i> <sub>6</sub>                          |
| <b>Figure S16</b> | HMBC spectrum of ianthelliformisamine F ( <b>6</b> ) in DMSO- <i>d</i> <sub>6</sub>                          |
| <b>Figure S17</b> | COSY spectrum of ianthelliformisamine F ( <b>6</b> ) in DMSO- <i>d</i> <sub>6</sub>                          |
| <b>Table S4</b>   | NMR data table for ianthelliformisamine G ( <b>7</b> ) in DMSO- <i>d</i> <sub>6</sub>                        |
| <b>Figure S18</b> | <sup>1</sup> H NMR (800 MHz) spectrum of ianthelliformisamine G ( <b>7</b> ) in DMSO- <i>d</i> <sub>6</sub>  |
| <b>Figure S19</b> | <sup>13</sup> C NMR (200 MHz) spectrum of ianthelliformisamine G ( <b>7</b> ) in DMSO- <i>d</i> <sub>6</sub> |

|                   |                                                                                                                                                            |
|-------------------|------------------------------------------------------------------------------------------------------------------------------------------------------------|
| <b>Figure S20</b> | HSQC spectrum of ianthelliformisamine G ( <b>7</b> ) in DMSO- <i>d</i> <sub>6</sub>                                                                        |
| <b>Figure S21</b> | HMBC spectrum of ianthelliformisamine G ( <b>7</b> ) in DMSO- <i>d</i> <sub>6</sub>                                                                        |
| <b>Figure S22</b> | COSY spectrum of ianthelliformisamine G ( <b>7</b> ) in DMSO- <i>d</i> <sub>6</sub>                                                                        |
| <b>Figure S23</b> | <sup>1</sup> H NMR (800 MHz) spectrum of aplysterol ( <b>8</b> ) in DMSO- <i>d</i> <sub>6</sub>                                                            |
| <b>Figure S24</b> | <sup>13</sup> C NMR (200 MHz) spectrum of aplysterol ( <b>8</b> ) in DMSO- <i>d</i> <sub>6</sub>                                                           |
| <b>Figure S25</b> | <sup>1</sup> H NMR (800 MHz) spectrum of ianthelliformisamine A ( <b>1</b> ) in DMSO- <i>d</i> <sub>6</sub>                                                |
| <b>Figure S26</b> | <sup>1</sup> H NMR (800 MHz) spectrum of ianthelliformisamine B ( <b>2</b> ) in DMSO- <i>d</i> <sub>6</sub>                                                |
| <b>Figure S27</b> | <sup>1</sup> H NMR (800 MHz) spectrum of ianthelliformisamine C ( <b>3</b> ) in DMSO- <i>d</i> <sub>6</sub>                                                |
| <b>Figure S28</b> | <sup>1</sup> H NMR (800 MHz) spectrum of 3,5-dibromo-4-methoxybenzaldehyde ( <b>9</b> ) in DMSO- <i>d</i> <sub>6</sub>                                     |
| <b>Figure S29</b> | <sup>13</sup> C NMR (200 MHz) spectrum of 3,5-dibromo-4-methoxybenzaldehyde ( <b>9</b> ) in DMSO- <i>d</i> <sub>6</sub>                                    |
| <b>Figure S30</b> | <sup>1</sup> H NMR (800 MHz) spectrum of ( <i>E</i> )-3-(3,5-dibromo-4-methoxyphenyl)acrylic acid ( <b>10</b> ) in DMSO- <i>d</i> <sub>6</sub>             |
| <b>Figure S31</b> | <sup>13</sup> C NMR (200 MHz) spectrum of ( <i>E</i> )-3-(3,5-dibromo-4-methoxyphenyl)acrylic acid ( <b>10</b> ) in DMSO- <i>d</i> <sub>6</sub>            |
| <b>Figure S32</b> | <sup>1</sup> H NMR (800 MHz) spectrum of synthetic ianthelliformisamine D ( <b>4</b> ) in DMSO- <i>d</i> <sub>6</sub>                                      |
| <b>Figure S33</b> | <sup>13</sup> C NMR (200 MHz) spectrum of synthetic ianthelliformisamine D ( <b>4</b> ) in DMSO- <i>d</i> <sub>6</sub>                                     |
| <b>Figure S34</b> | Stacked <sup>1</sup> H NMR (800 MHz) spectra of natural product (a) and synthetic (b), ianthelliformisamine D ( <b>4</b> ) in DMSO- <i>d</i> <sub>6</sub>  |
| <b>Figure S35</b> | Stacked <sup>13</sup> C NMR (200 MHz) spectra of natural product (a) and synthetic (b), ianthelliformisamine D ( <b>4</b> ) in DMSO- <i>d</i> <sub>6</sub> |

**Table S1:** NMR data table for ianthelliformisamine D (**4**) in DMSO-*d*<sub>6</sub><sup>a</sup>

| position           | $\delta_C$ , type     | $\delta_H$ , mult. ( <i>J</i> in Hz) | COSY     | HMBC                                      | ROESY              |
|--------------------|-----------------------|--------------------------------------|----------|-------------------------------------------|--------------------|
| 1                  | 134.5, C              |                                      |          |                                           |                    |
| 2                  | 131.6, CH             | 7.89, s                              |          | 3, 4, 6, 7                                | 7, 8               |
| 3                  | 118.0, C              |                                      |          |                                           |                    |
| 4                  | 153.9, C              |                                      |          |                                           |                    |
| 4-OCH <sub>3</sub> | 60.6, CH <sub>3</sub> | 3.81, s                              |          | 4                                         |                    |
| 5                  | 118.0, C              |                                      |          |                                           |                    |
| 6                  | 131.6, CH             | 7.89, s                              |          | 2, 4, 5, 7                                | 7, 8               |
| 7                  | 135.2, CH             | 7.33, d (15.8)                       | 8        | 1 <sup>w</sup> , 2, 6, 8 <sup>w</sup> , 9 | 2, 6               |
| 8                  | 124.5, CH             | 6.66, d (15.8)                       | 7        | 1, 9                                      | 2, 6, 9-NH         |
| 9                  | 164.4, C              |                                      |          |                                           |                    |
| 9-NH               |                       | 8.04, t (5.7)                        | 10       | 9, 10 <sup>w</sup>                        | 8, 10 <sup>w</sup> |
| 10                 | 36.5, CH <sub>2</sub> | 3.14 dt (5.7, 6.5)                   | 9-NH, 11 | 9, 11 <sup>w</sup> , 12                   | 9-NH, 11, 12       |
| 11                 | 27.0, CH <sub>2</sub> | 1.63, m                              | 10, 12   | 10 <sup>w</sup> , 12                      | 10, 12             |
| 12                 | 39.7, CH <sub>2</sub> | 3.20, t (7.2)                        | 11       | 10, 11 <sup>w</sup> , 13 <sup>w</sup>     | 10, 11             |
| 13                 | 46.4, CH <sub>2</sub> | 3.33, m                              | 14       | 12 <sup>w</sup> , 14 <sup>w</sup> , 15    | 14, 15             |
| 14                 | 17.5, CH <sub>2</sub> | 1.91, m                              | 13, 15   | 13, 15 <sup>w</sup> , 16                  | 13, 15             |
| 15                 | 30.5, CH <sub>2</sub> | 2.21, t (8.0)                        | 14       | 13, 14, 16                                | 13, 14             |
| 16                 | 173.9                 |                                      |          |                                           |                    |

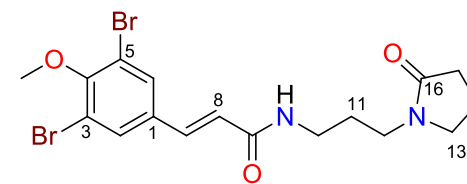

<sup>a</sup>Spectra recorded at 25 °C (800 MHz for <sup>1</sup>H NMR and 200 MHz for <sup>13</sup>C NMR); <sup>w</sup>Weak correlation.

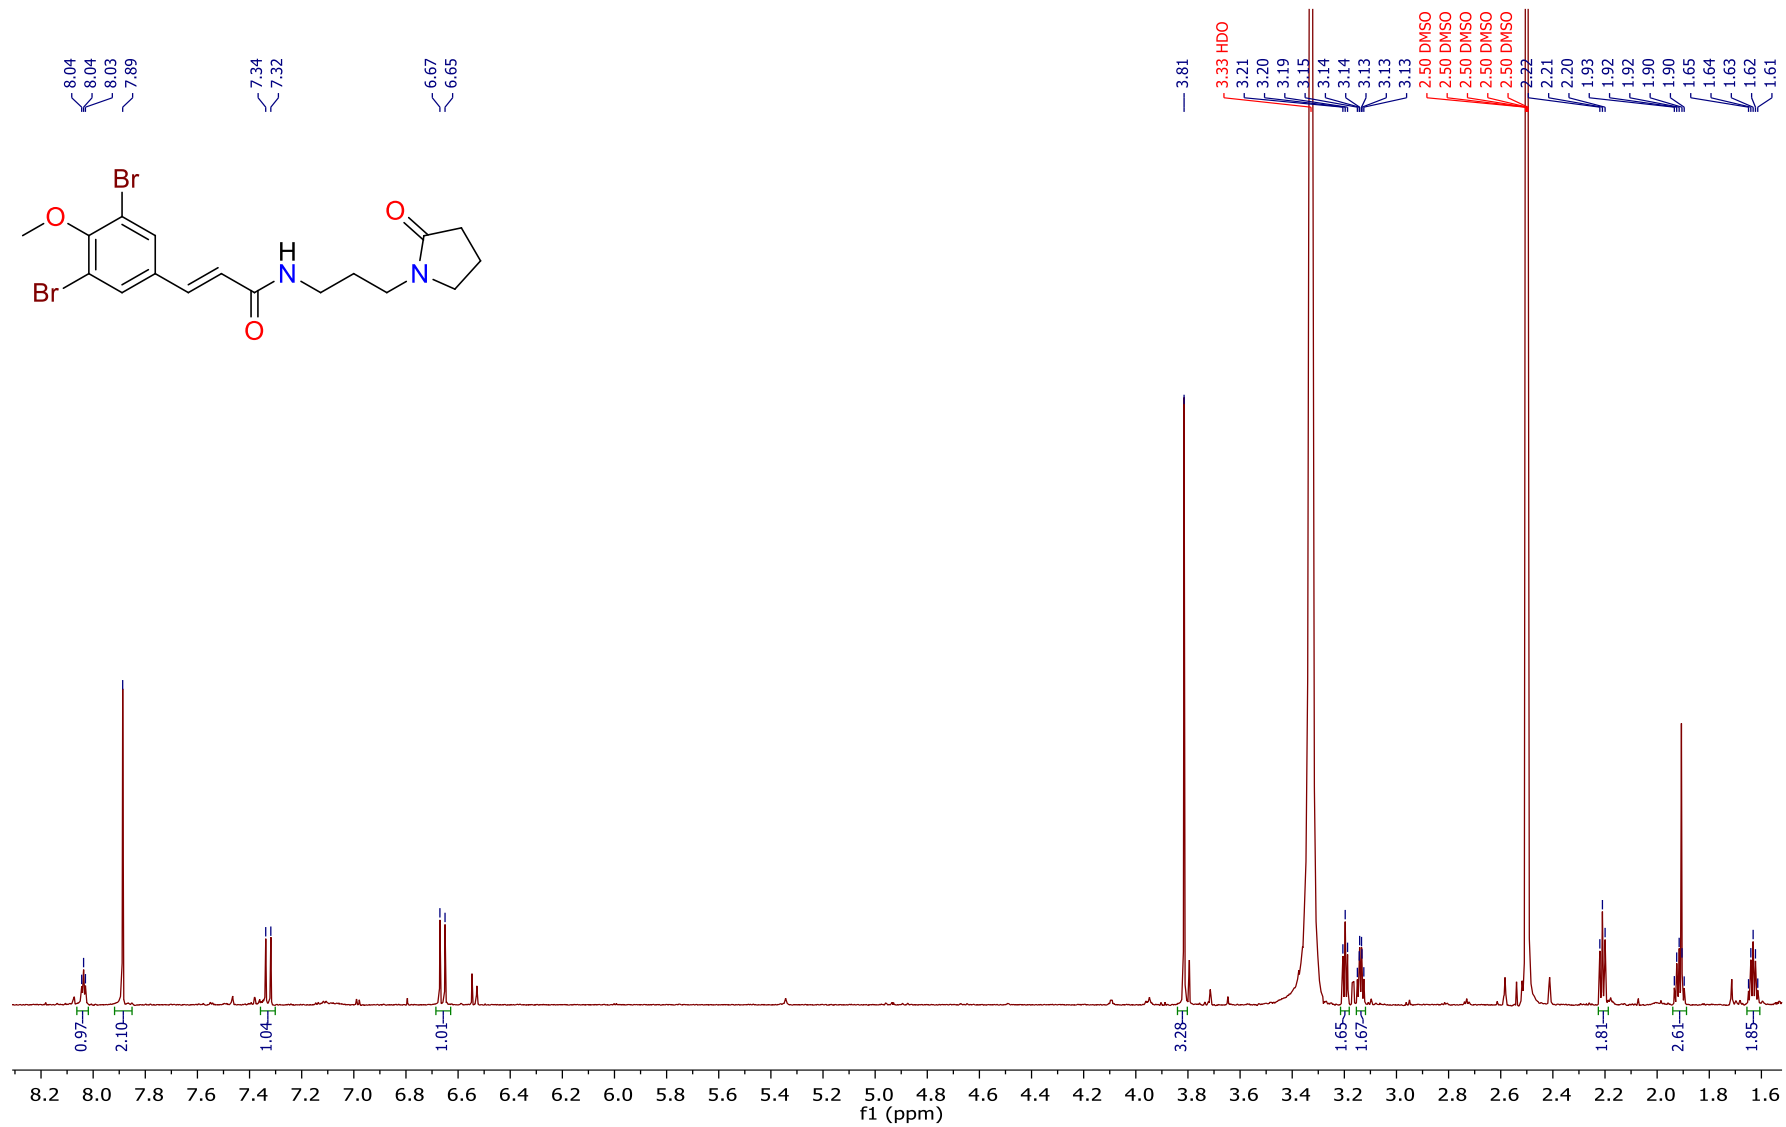

**Figure S1:** <sup>1</sup>H NMR (800 MHz) spectrum of ianthelliformisamine D (4) in DMSO-*d*<sub>6</sub>

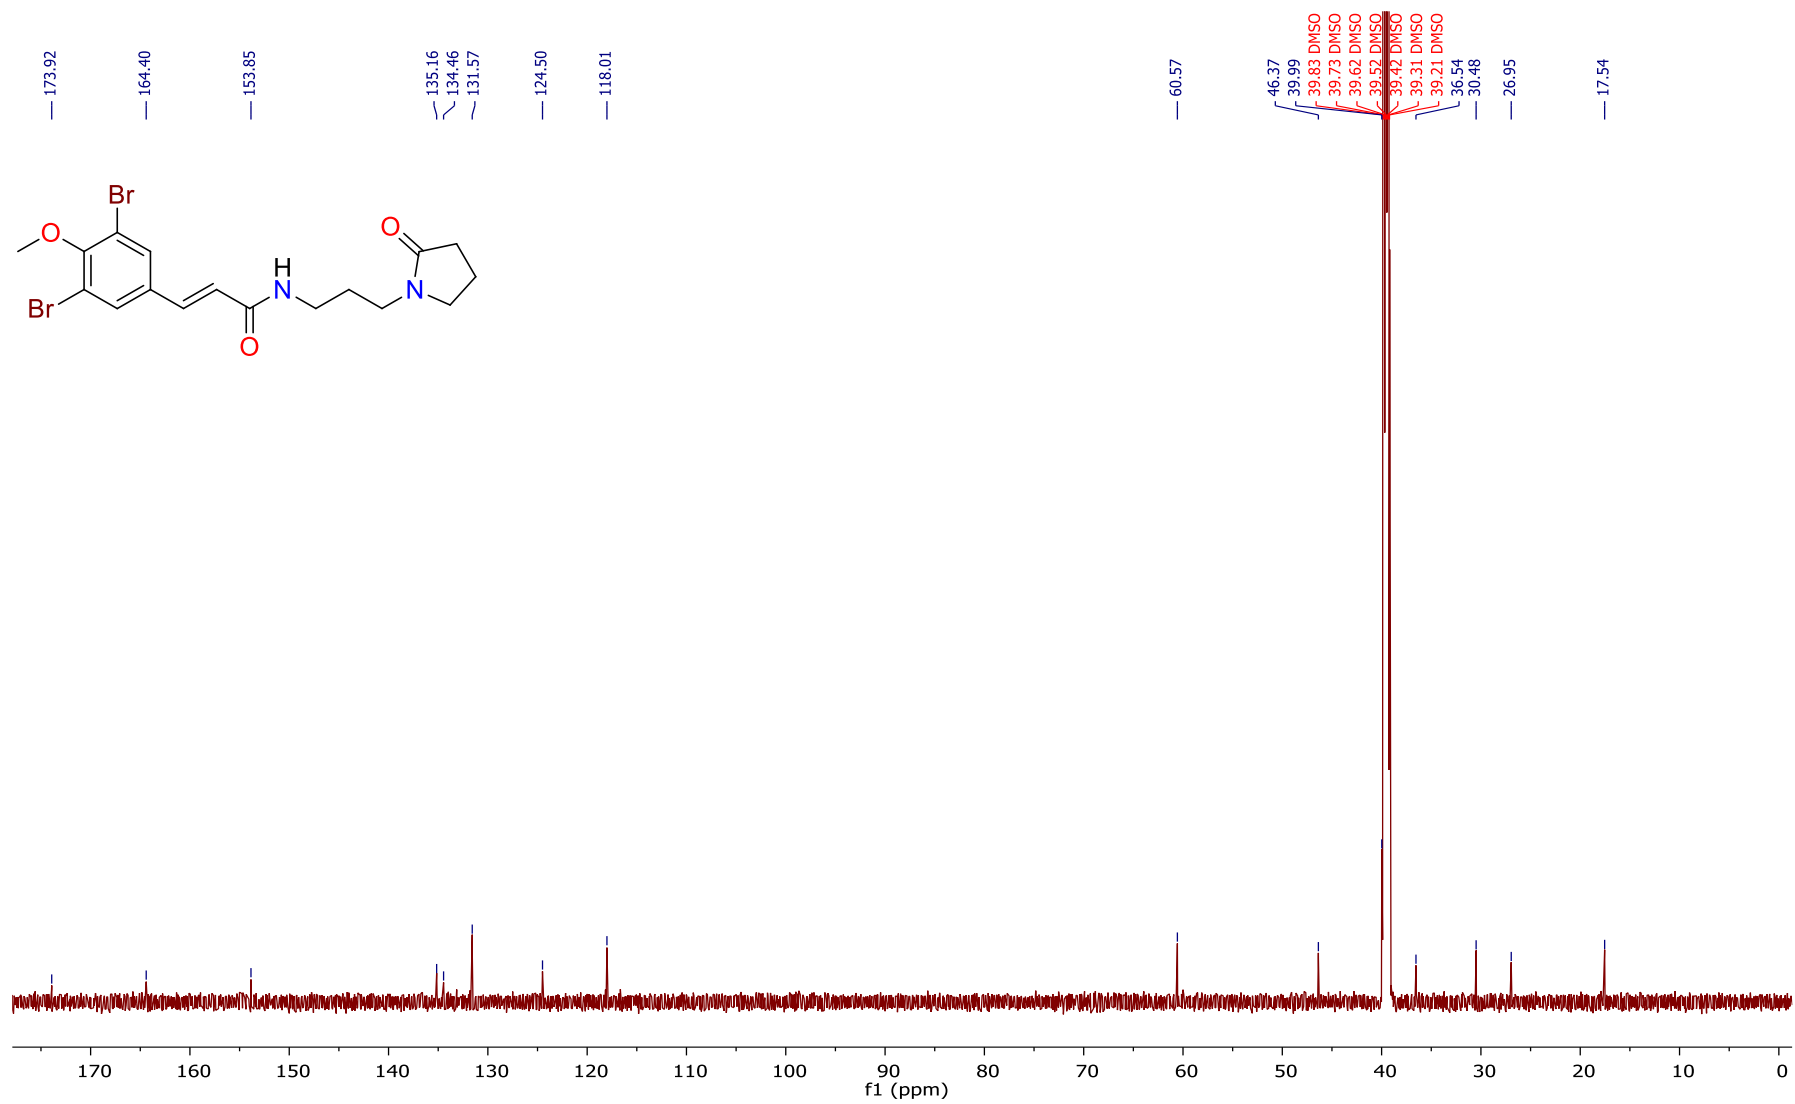

**Figure S2:**  $^{13}\text{C}$  NMR (200 MHz) spectrum of ianthelliformisamine D (4) in  $\text{DMSO-}d_6$

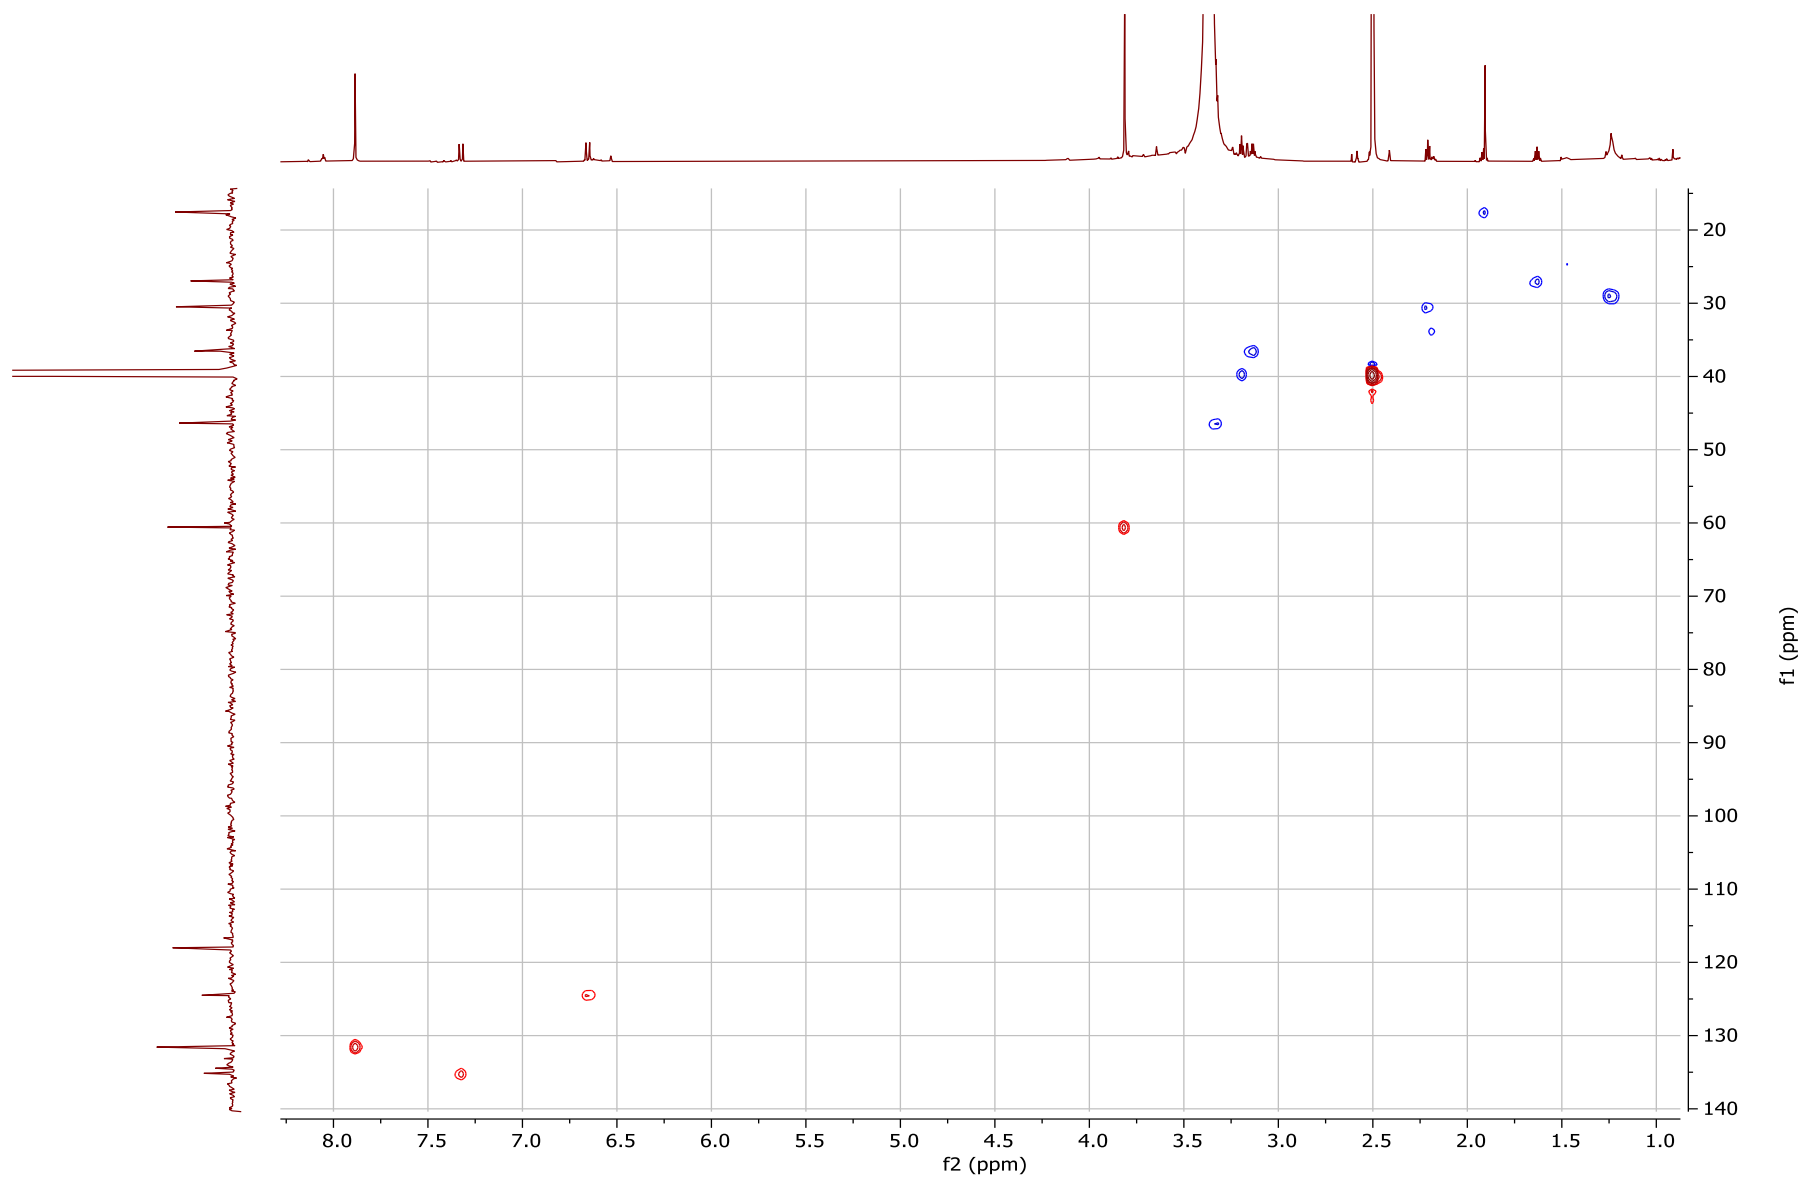

**Figure S3:** HSQC spectrum of ianthelliformisamine D (**4**) in DMSO-*d*<sub>6</sub>

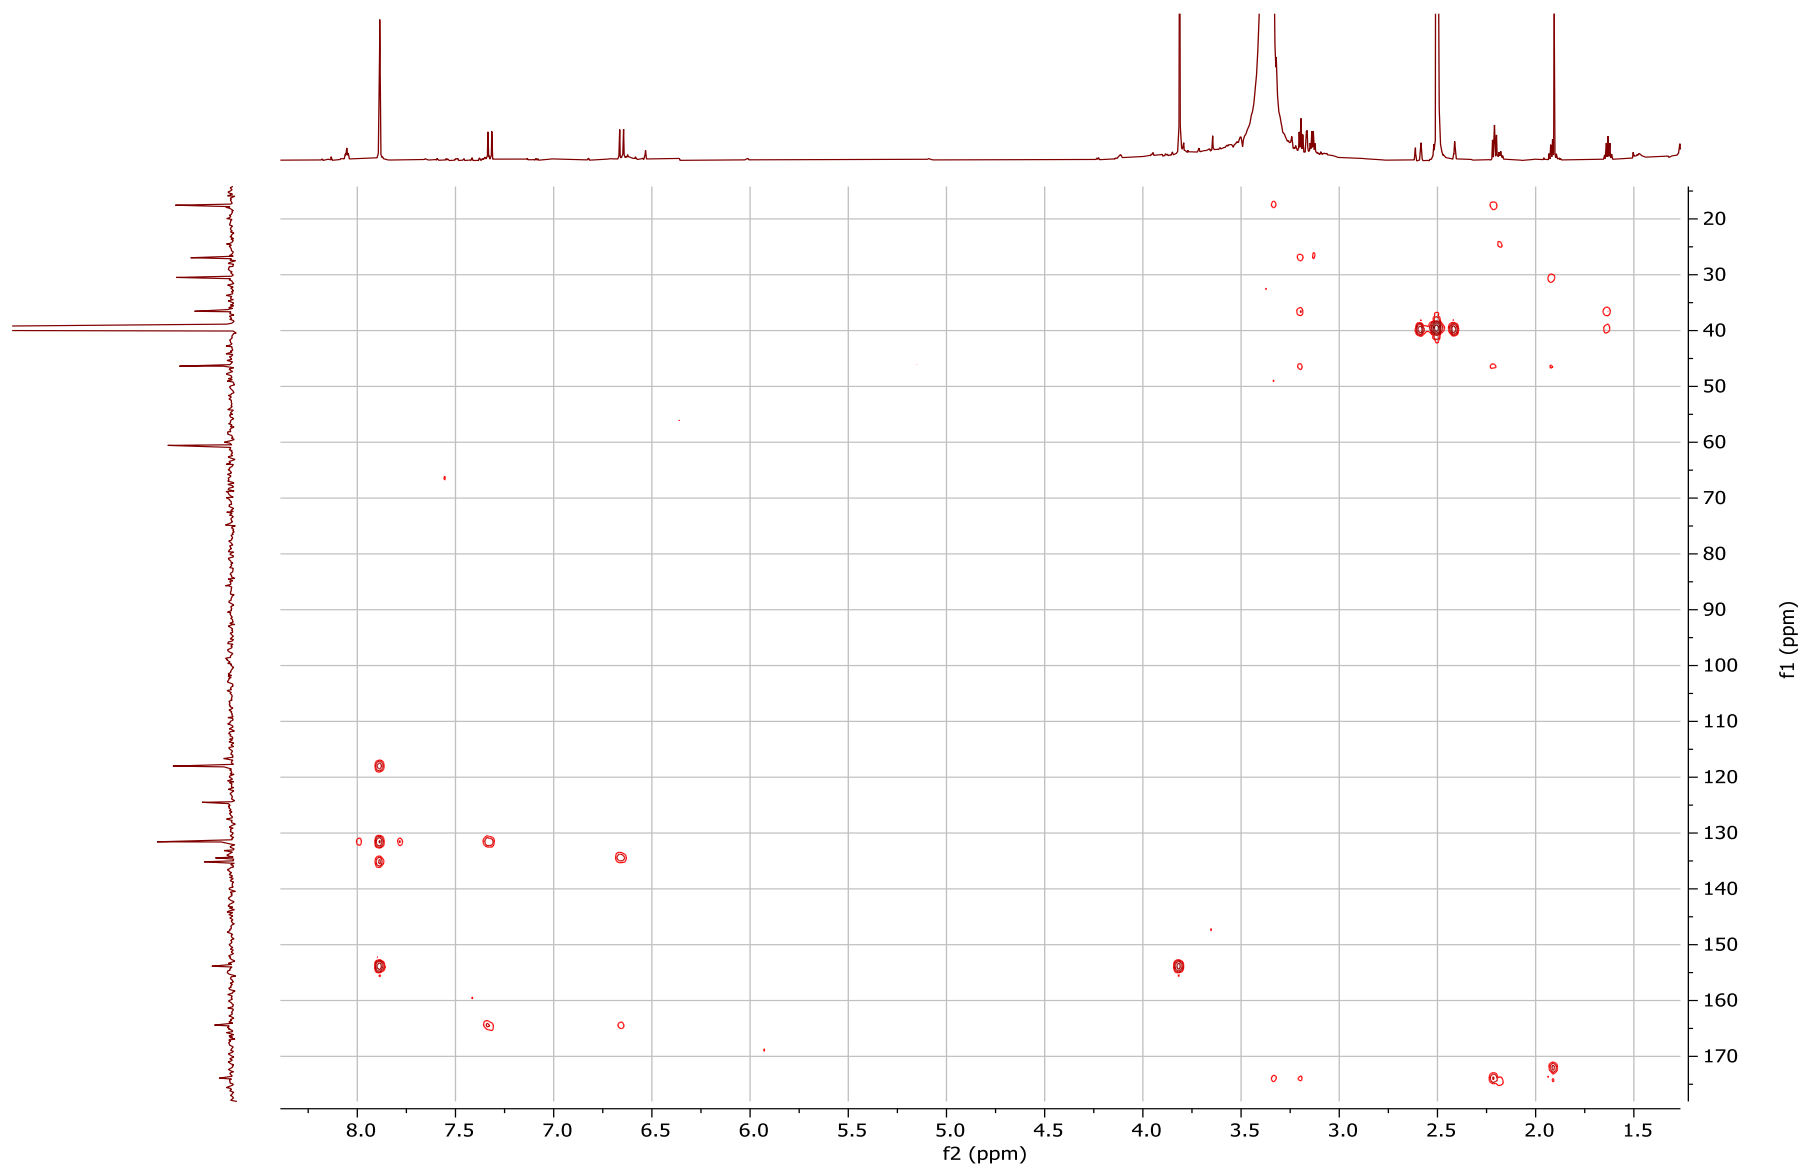

**Figure S4:** HMBC spectrum of ianthelliformisamine D (**4**) in DMSO-*d*<sub>6</sub>



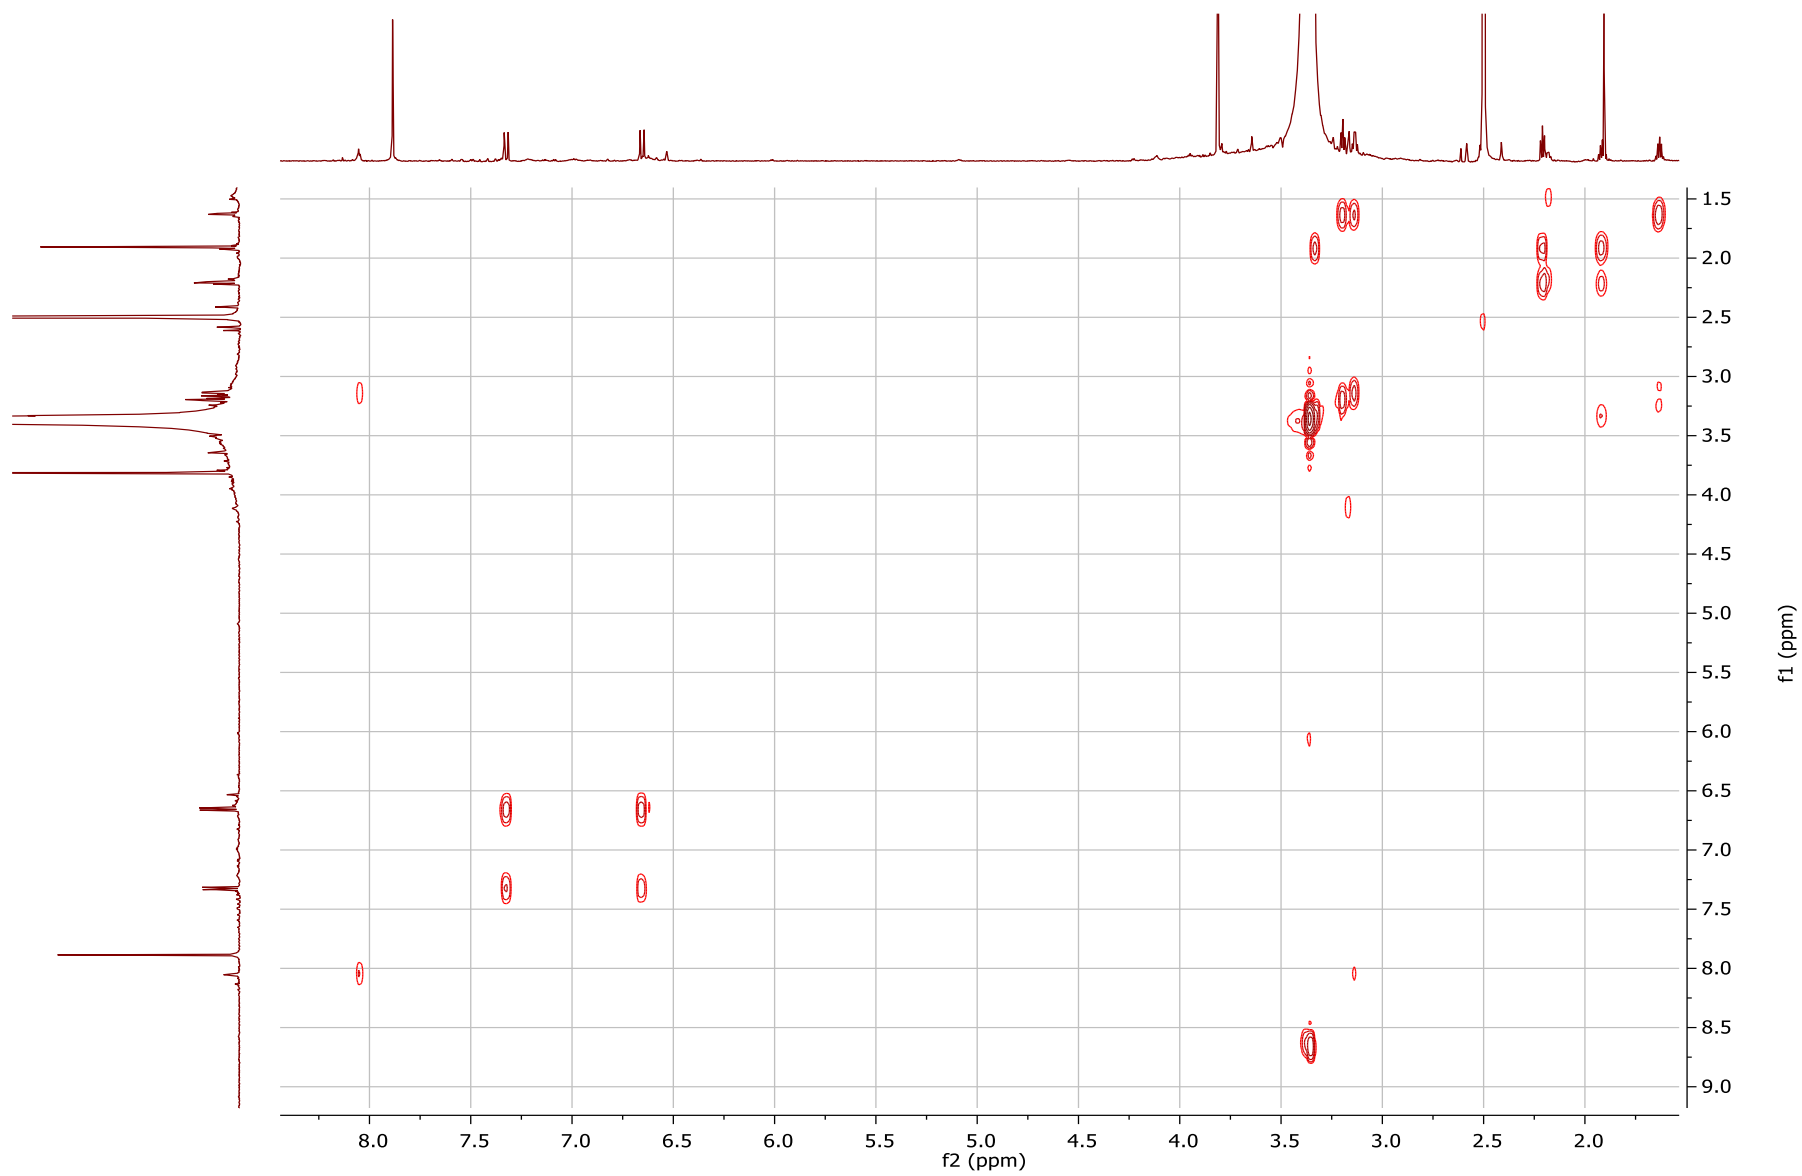

**Figure S5:** COSY spectrum of ianthelliformisamine D (**4**) in DMSO-*d*<sub>6</sub>

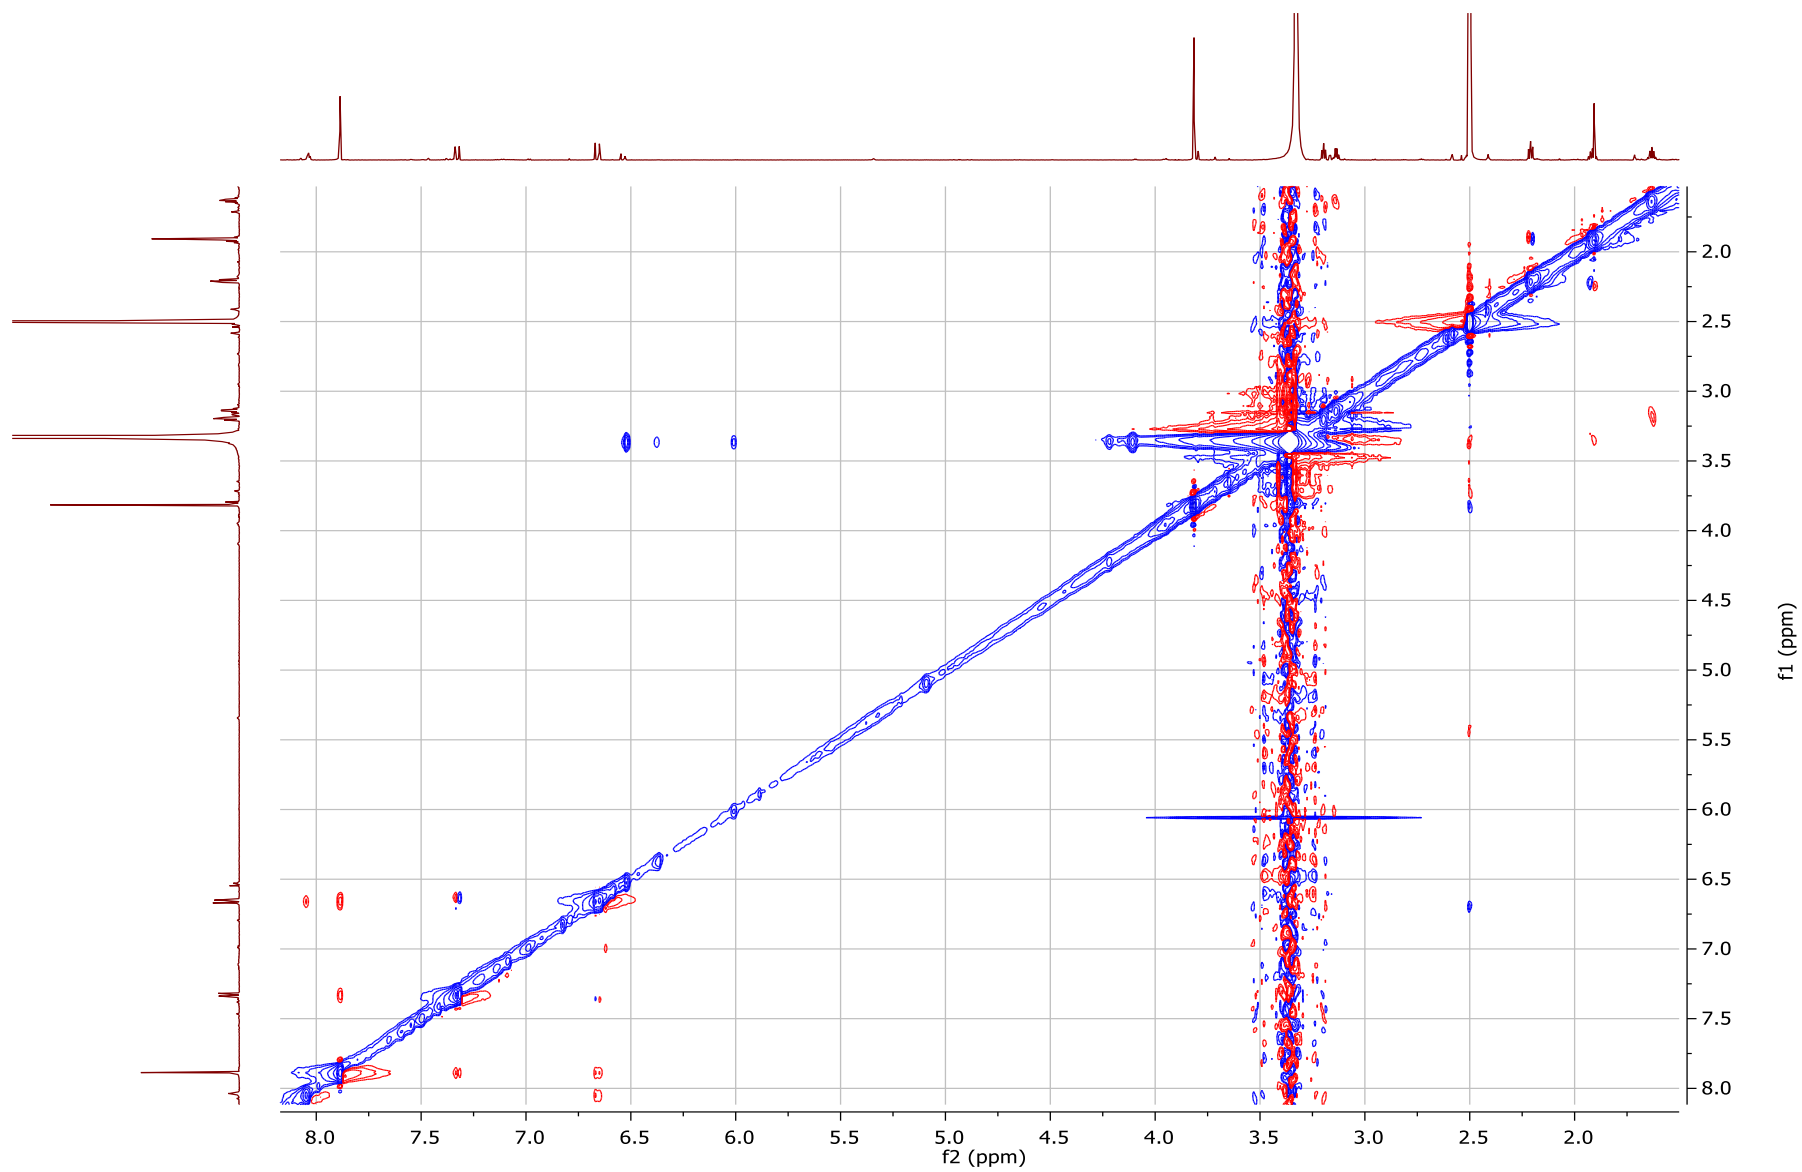

**Figure S6:** ROESY spectrum of ianthelliformisamine D (**4**) in DMSO-*d*<sub>6</sub>

**Table S2:** NMR data table for ianthelliformisamine E (**5**) in DMSO-*d*<sub>6</sub><sup>a, b</sup>

| position           | $\delta_C$ , type     | $\delta_H$ , mult. ( <i>J</i> in Hz) | COSY      | HMBC                                      | ROESY  |
|--------------------|-----------------------|--------------------------------------|-----------|-------------------------------------------|--------|
| 1                  | 134.3, C              |                                      |           |                                           |        |
| 2                  | 131.6, CH             | 7.89, s                              |           | 3, 4, 6, 7                                | 7, 8   |
| 3                  | 118.0, C              |                                      |           |                                           |        |
| 4                  | 153.9, C              |                                      |           |                                           |        |
| 4-OCH <sub>3</sub> | 60.6, CH <sub>3</sub> | 3.82, s                              |           | 4                                         |        |
| 5                  | 118.0, C              |                                      |           |                                           |        |
| 6                  | 131.6, CH             | 7.89, s                              |           | 2, 4, 5, 7                                | 7, 8   |
| 7                  | 135.5, CH             | 7.36, d (15.8)                       | 8         | 1 <sup>w</sup> , 2, 6, 8 <sup>w</sup> , 9 |        |
| 8                  | 124.1, CH             | 6.65, d (15.8)                       | 7         | 1, 9                                      |        |
| 9                  | 164.9, C              |                                      |           |                                           |        |
| 9-NH               |                       | 8.23, t (5.7)                        | 10        | 9, 10 <sup>w</sup>                        | 8, 10  |
| 10                 | 35.9, CH <sub>2</sub> | 3.25 dt (5.7, 6.5)                   | 9-NH, 11  | 9, 11 <sup>w</sup> , 12                   | 11, 12 |
| 11                 | 26.1, CH <sub>2</sub> | 1.77, m                              | 10, 12    | 10 <sup>w</sup> , 12                      | 10, 12 |
| 12                 | 44.8, CH <sub>2</sub> | 2.92, m                              | 11, 12-NH | 10, 11 <sup>w</sup> , 13 <sup>w</sup>     | 10, 11 |
| 12-NH              |                       | 8.35, brs                            | 12, 13    |                                           |        |
| 13                 | 46.3, CH <sub>2</sub> | 2.93, m                              | 12-NH, 14 | 12 <sup>w</sup> , 14 <sup>w</sup> , 15    | 14, 15 |
| 14                 | 21.1, CH <sub>2</sub> | 1.79, m                              | 13, 15    | 13, 15 <sup>w</sup> , 16                  | 13, 15 |
| 15                 | 30.4, CH <sub>2</sub> | 2.36, t (7.3)                        | 14        | 13, 14, 16                                | 13, 14 |
| 16                 | 173.6, C              |                                      |           |                                           |        |
| 16-OH              |                       | c                                    |           |                                           |        |

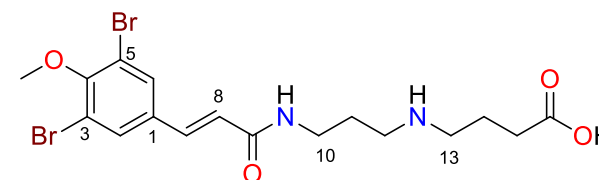

<sup>a</sup>Spectra recorded at 25 °C (800 MHz for <sup>1</sup>H NMR and 200 MHz for <sup>13</sup>C NMR); <sup>b</sup>Isolated as a TFA salt; <sup>c</sup>Not observed; <sup>w</sup>Weak correlation.

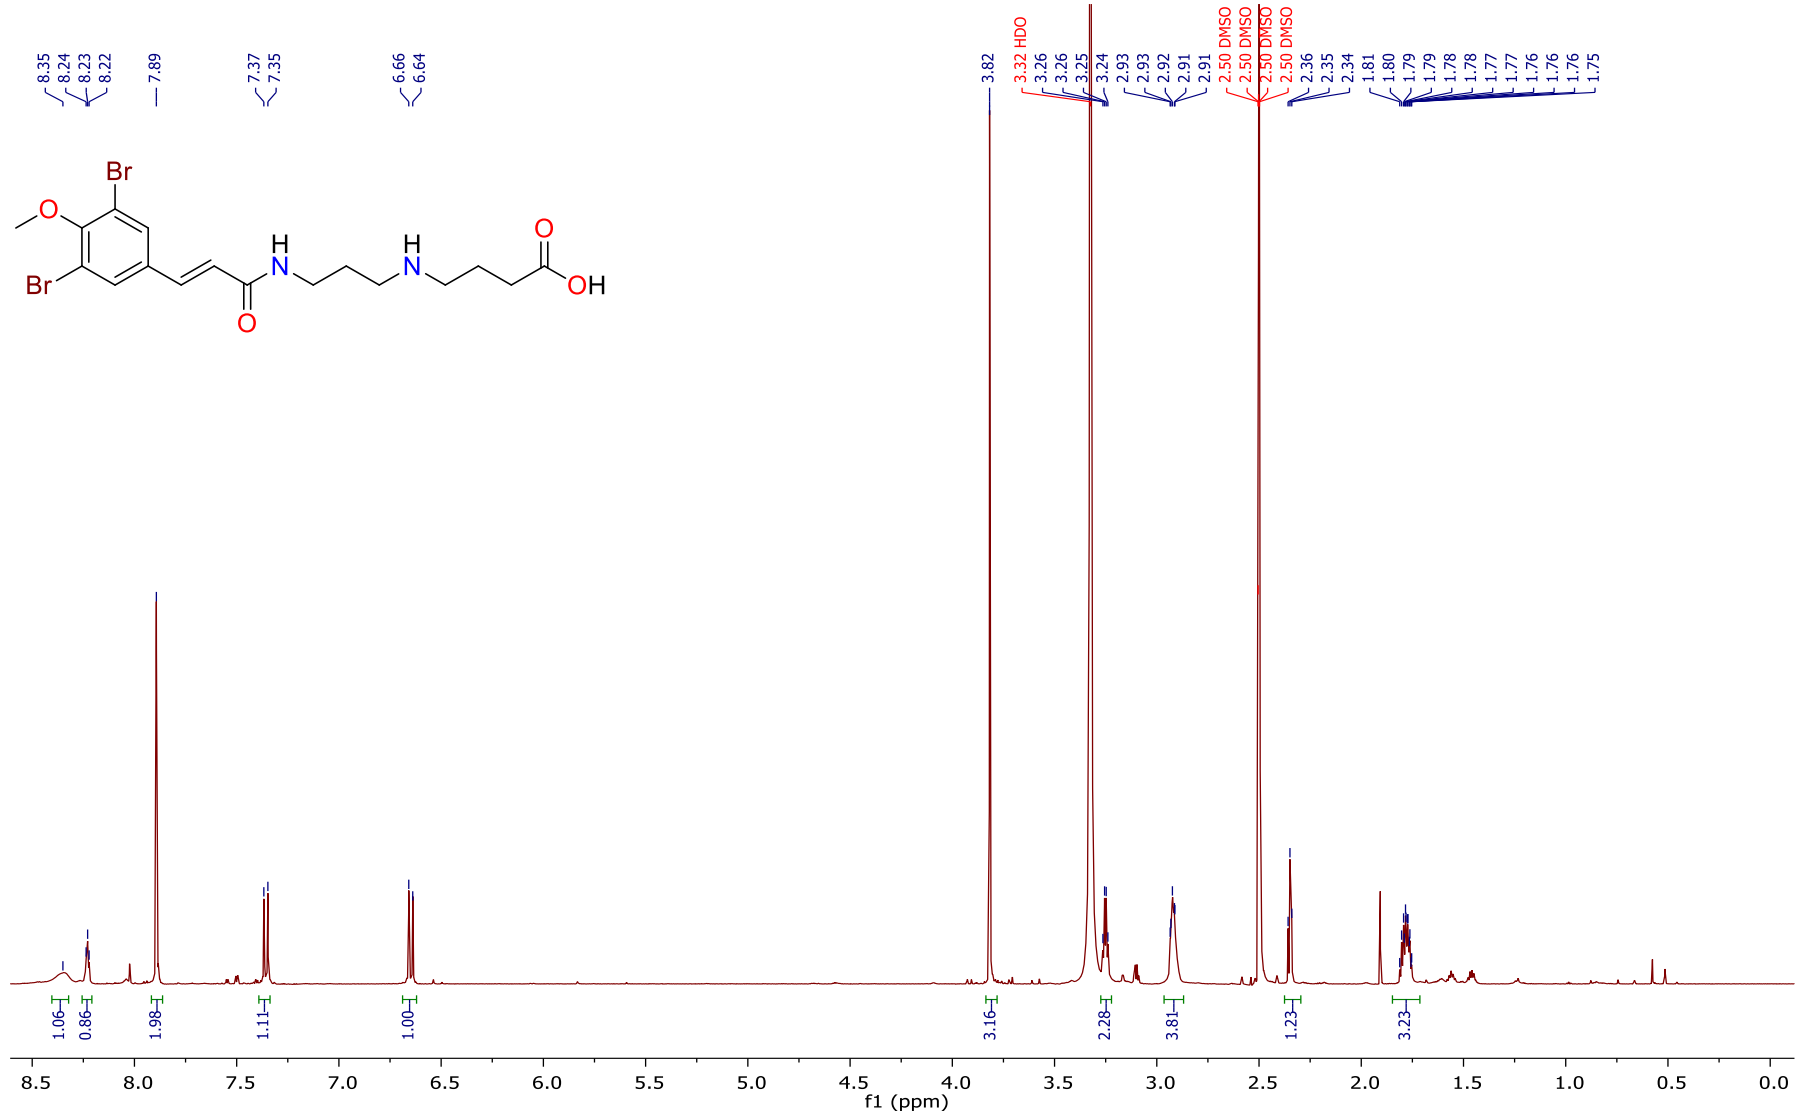

**Figure S7:** <sup>1</sup>H NMR (800 MHz) spectrum of ianthelliformisamine E (5) in DMSO-*d*<sub>6</sub>

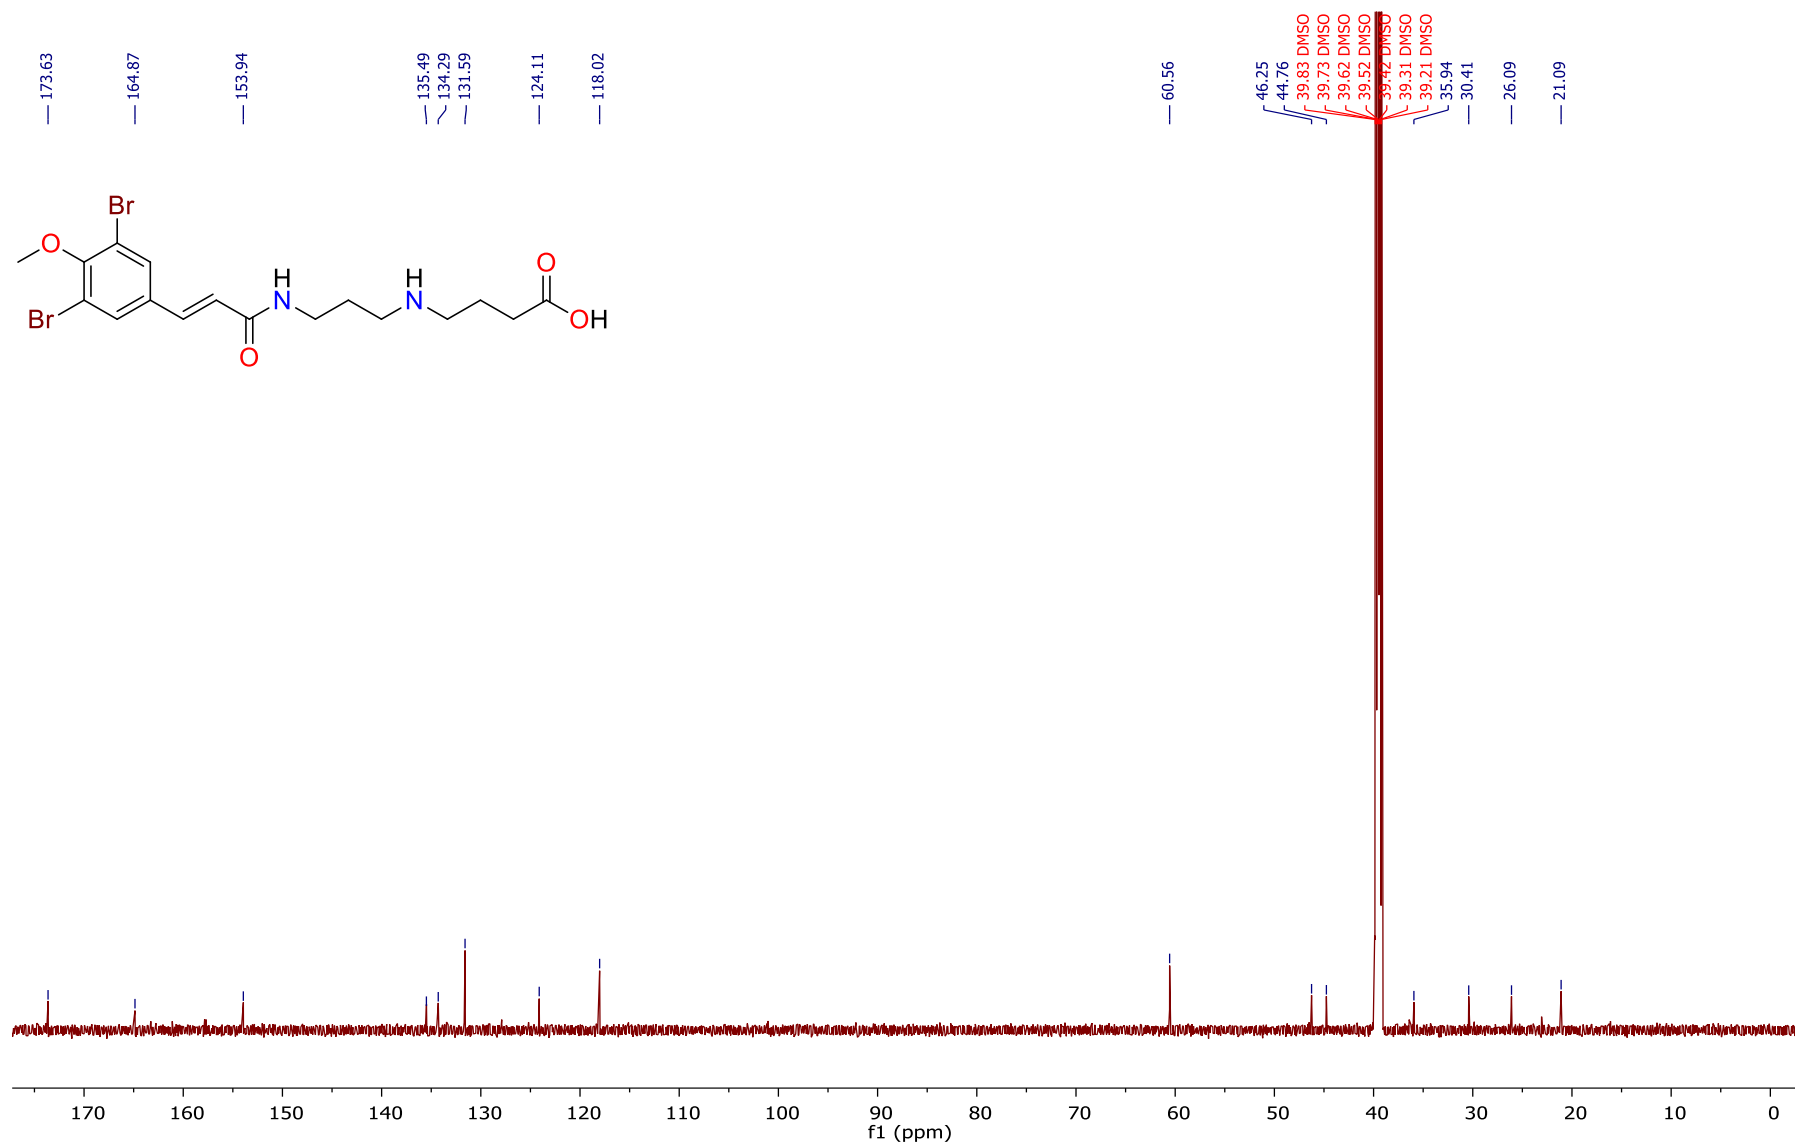

**Figure S8:**  $^{13}\text{C}$  NMR (200 MHz) spectrum of ianthelliformisamine E (5) in  $\text{DMSO-}d_6$

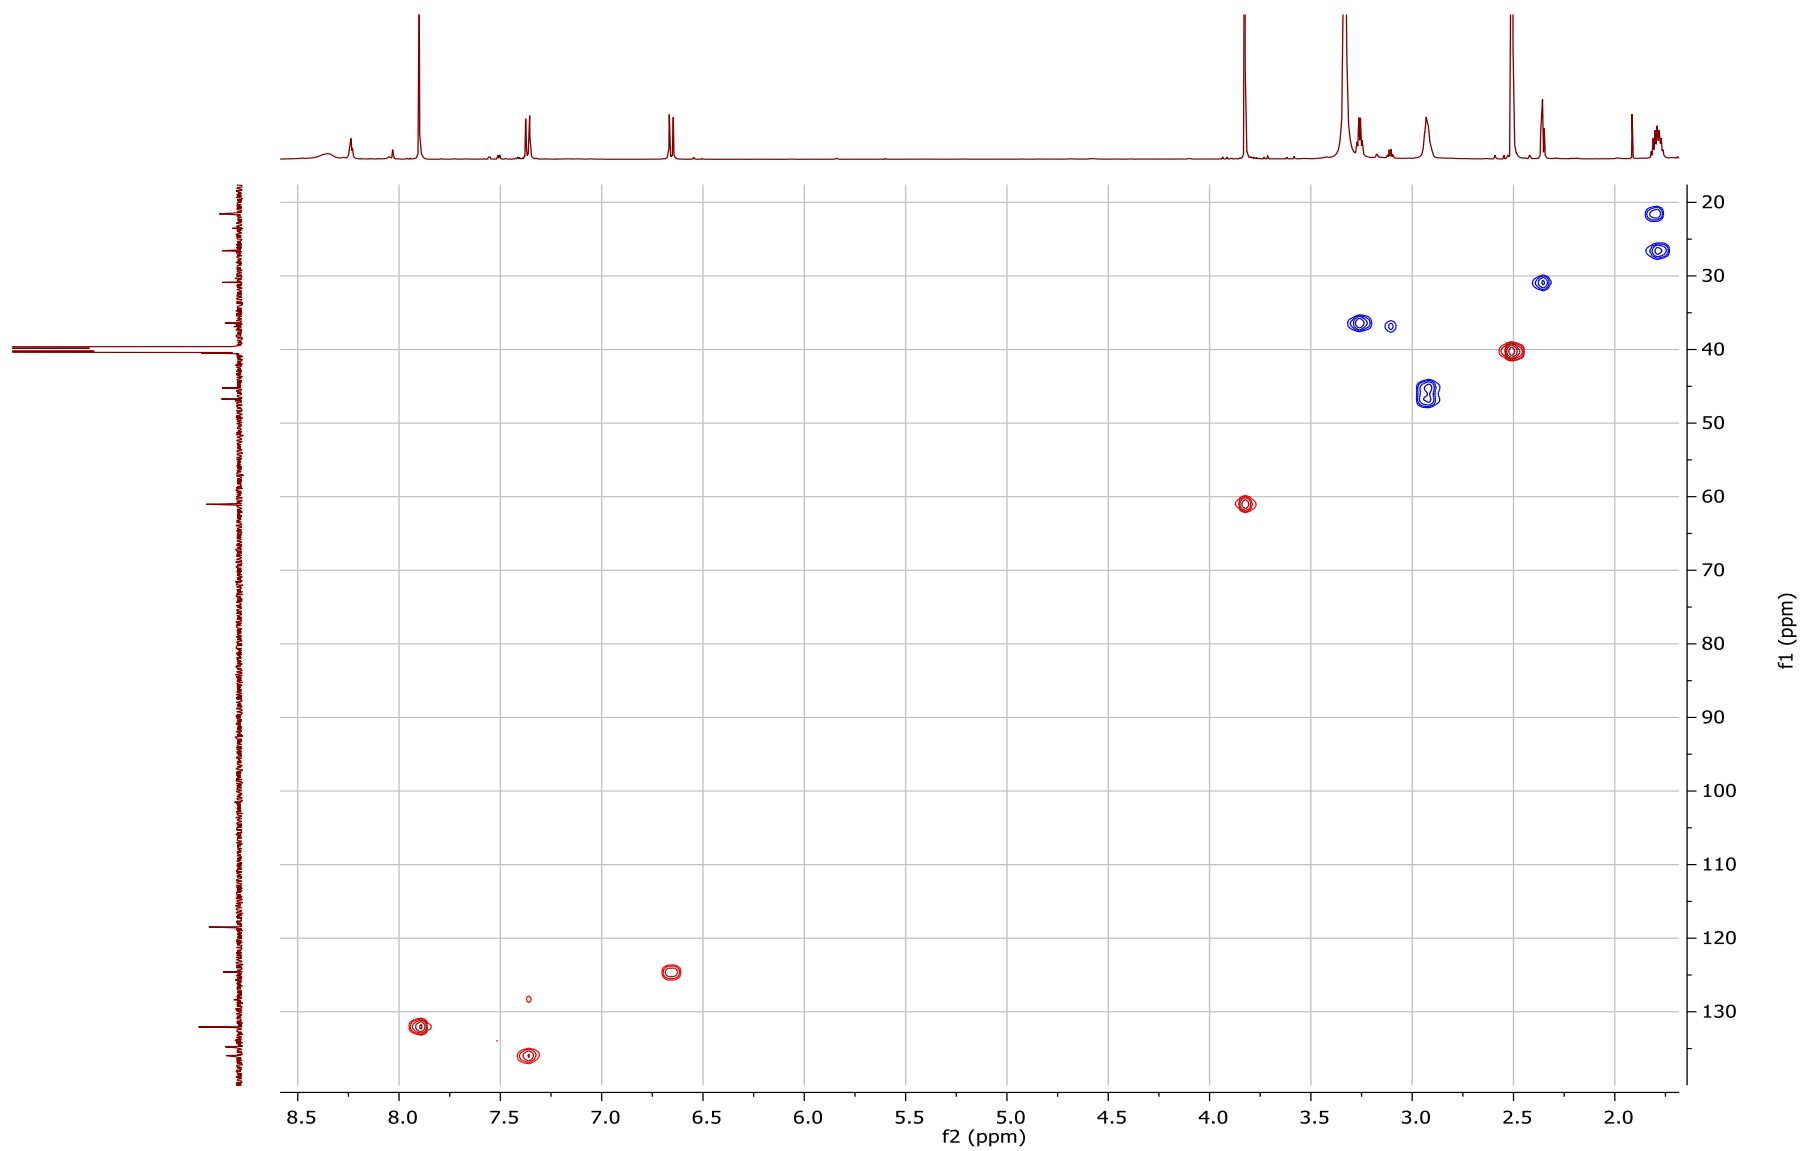

**Figure S9:** HSQC spectrum of ianthelliformisamine E (**5**) in DMSO-*d*<sub>6</sub>

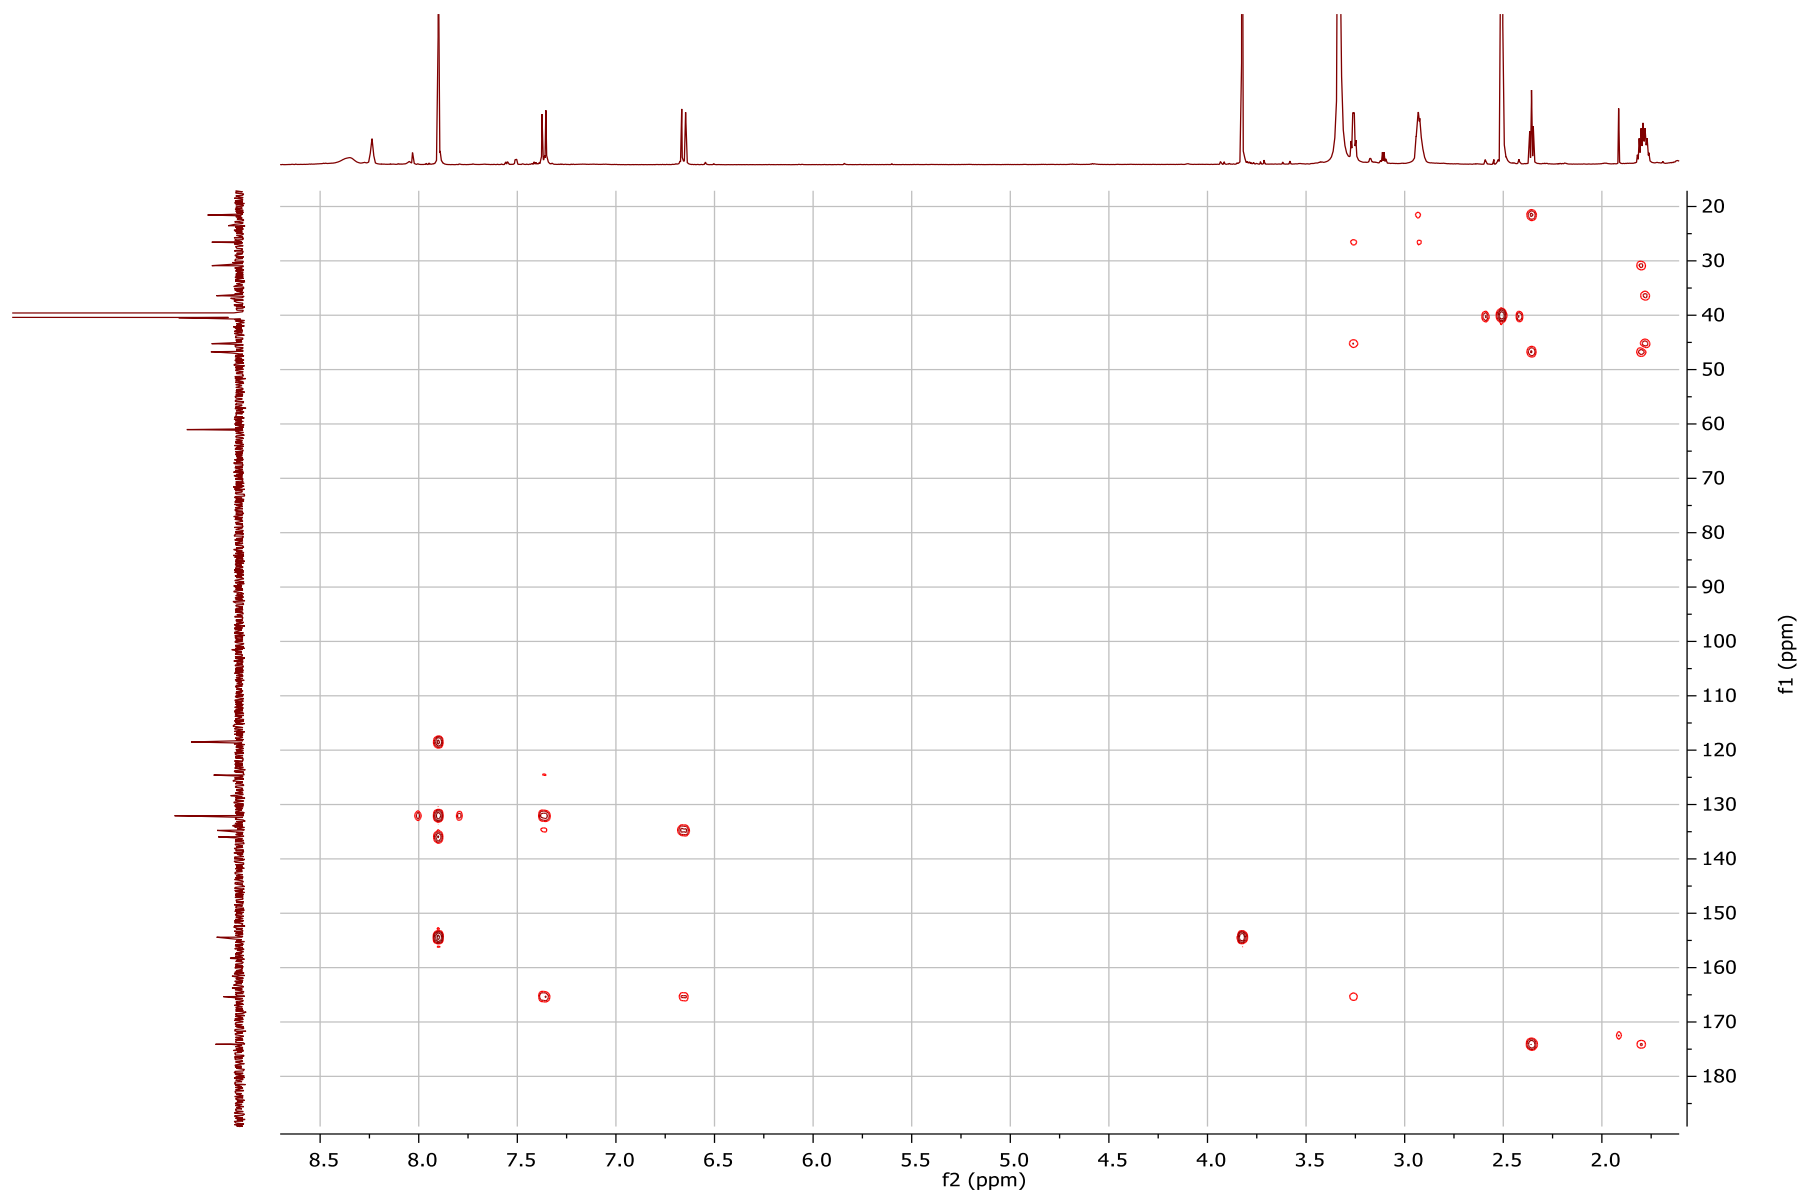

**Figure S10:** HMBC spectrum of ianthelliformisamine E (**5**) in DMSO-*d*<sub>6</sub>

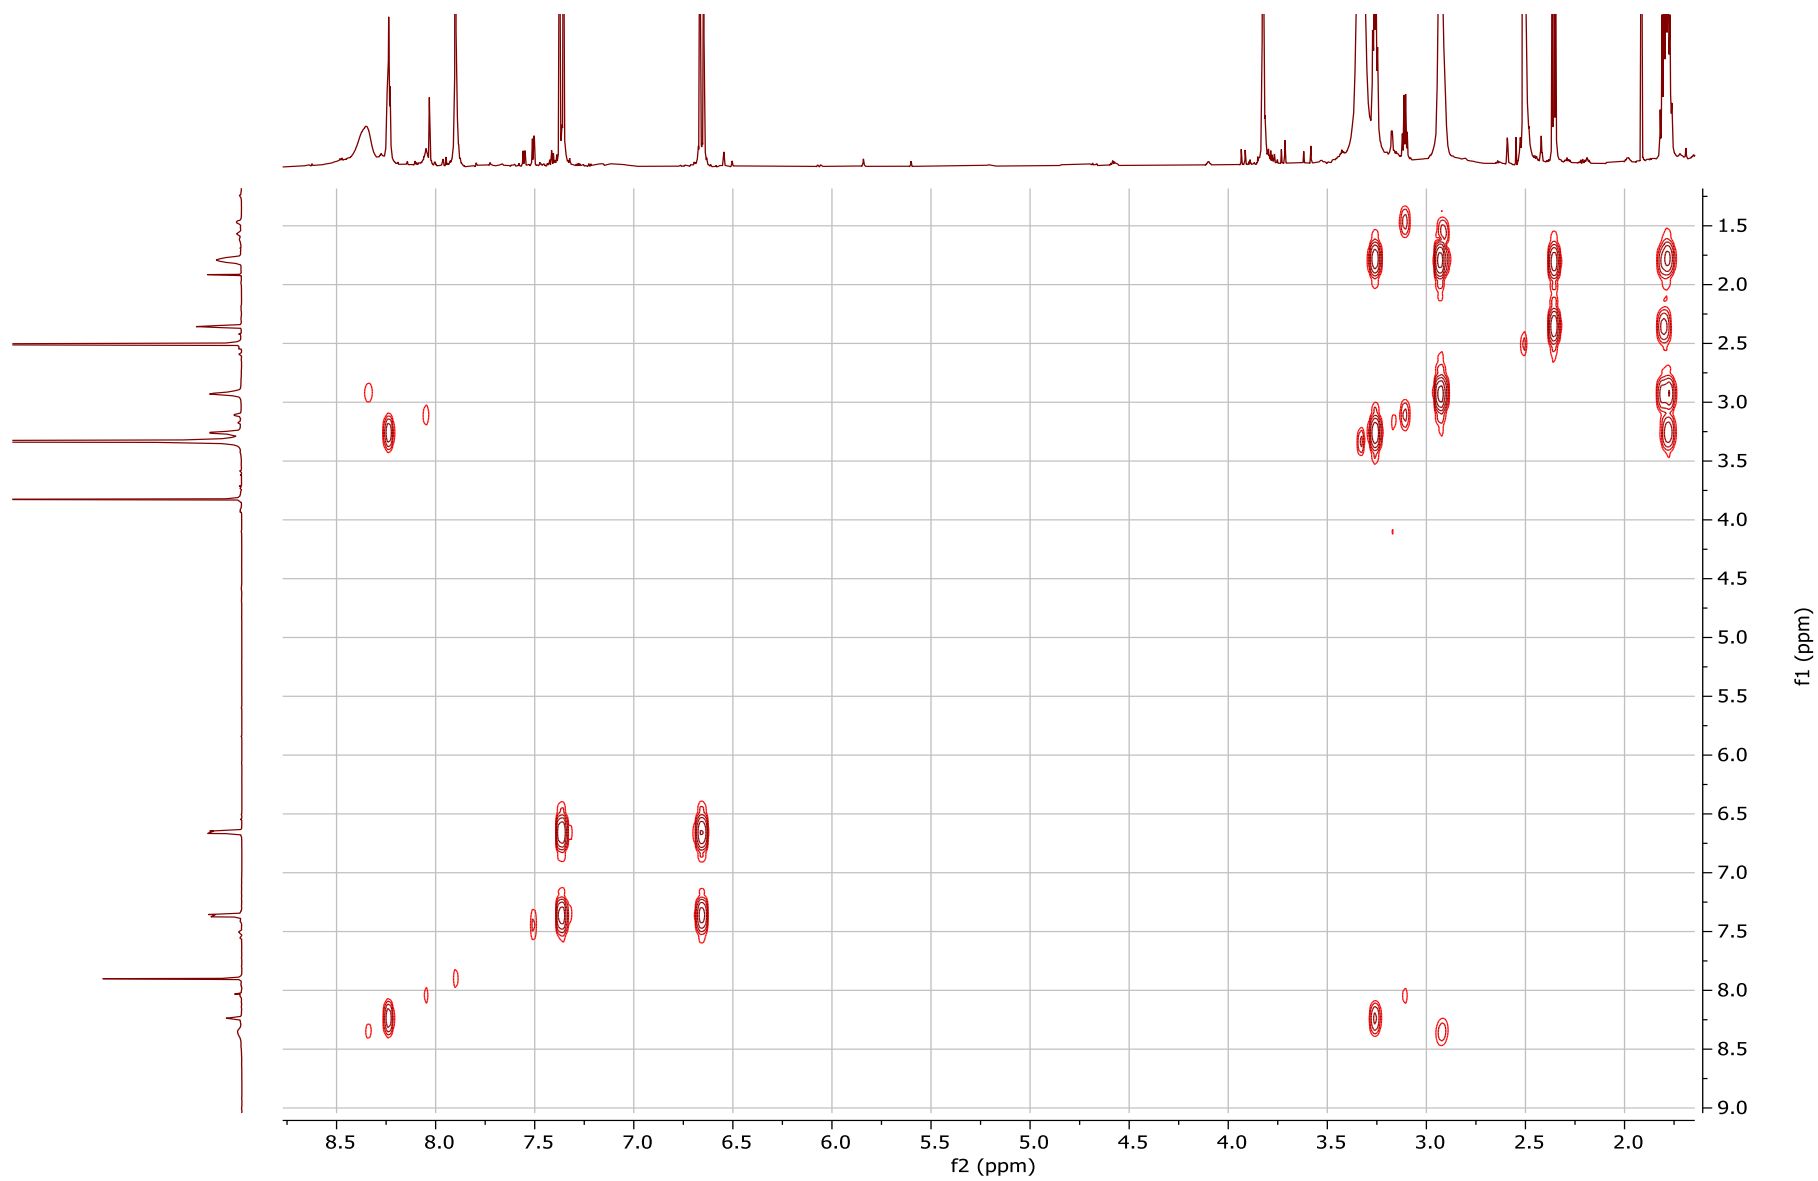

**Figure S11:** COSY spectrum of ianthelliformisamine E (**5**) in DMSO-*d*<sub>6</sub>



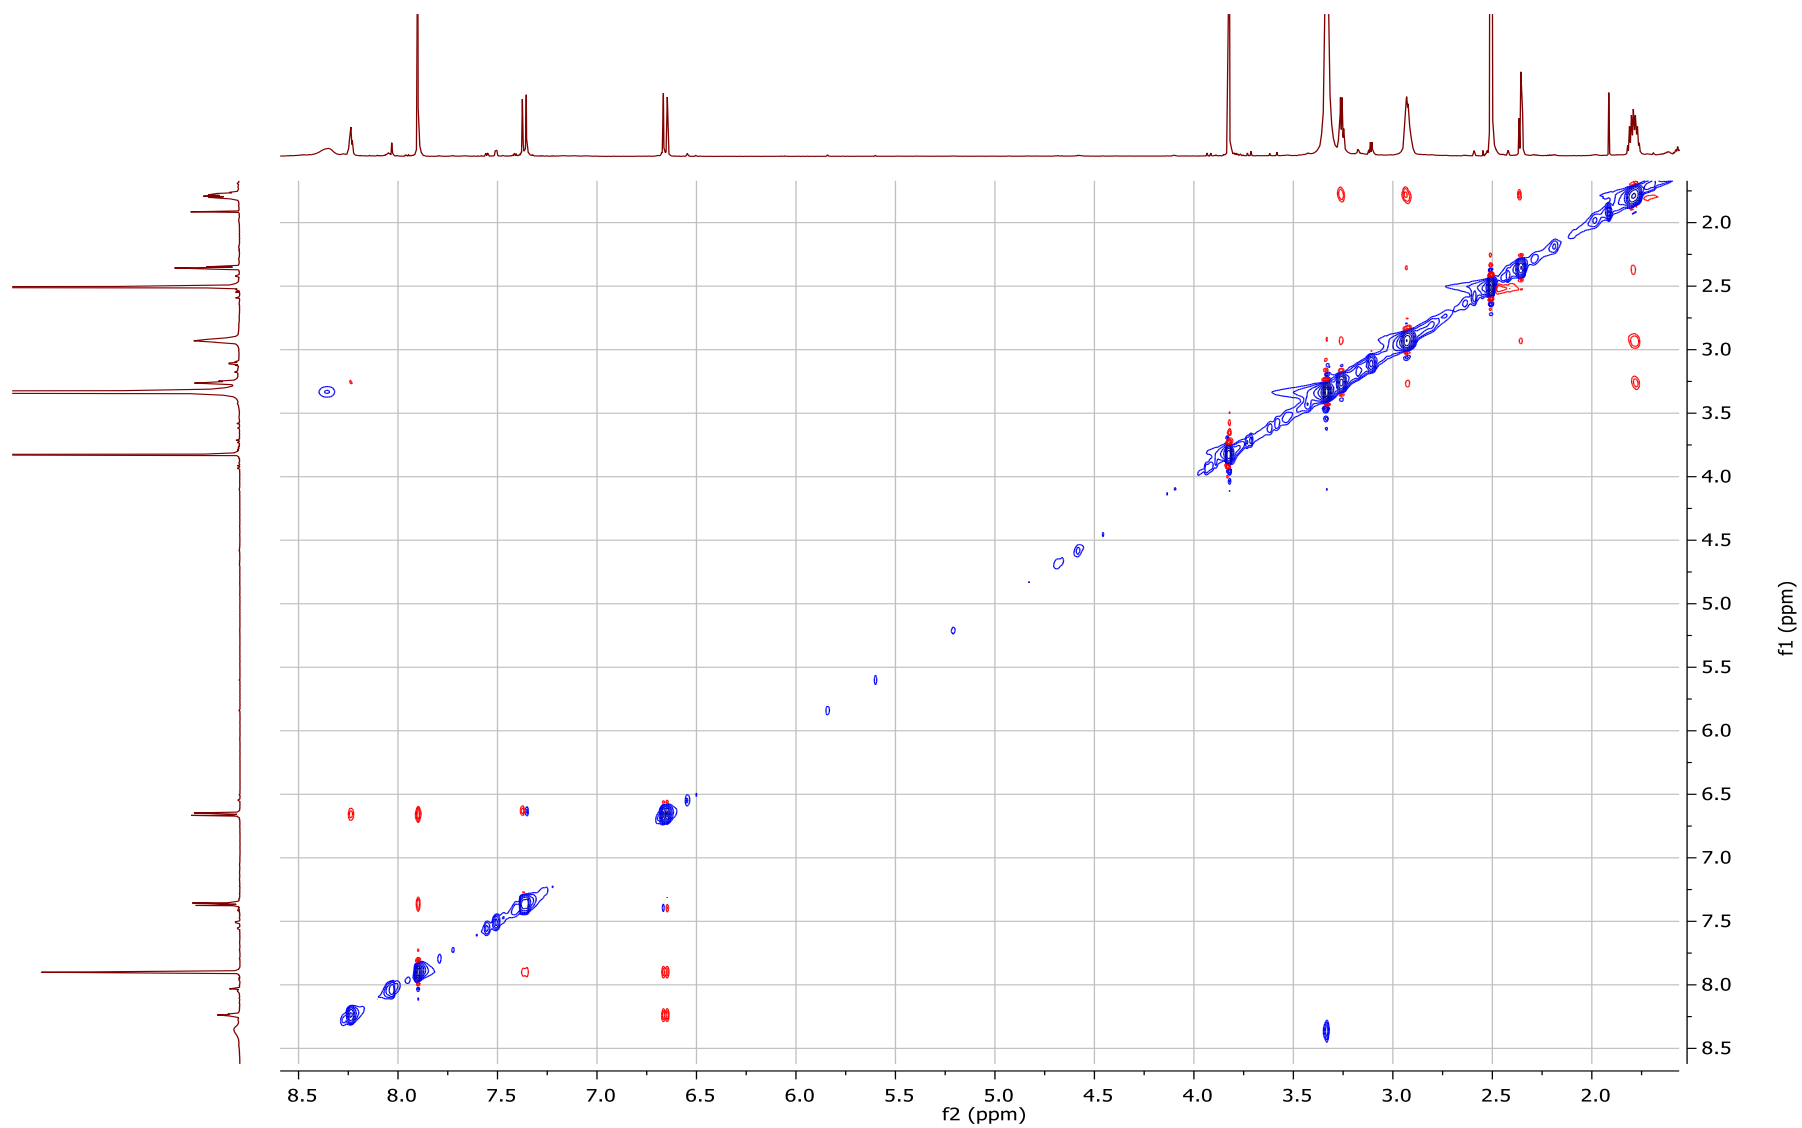

**Figure S12:** ROESY spectrum of ianthelliformisamine E (**5**) in DMSO-*d*<sub>6</sub>

**Table S3:** NMR data table for ianthelliformisamine F (**6**) in DMSO-*d*<sub>6</sub><sup>a</sup>

| position           | $\delta_C$ , type     | $\delta_H$ , mult. ( <i>J</i> in Hz) | COSY              | HMBC                        |
|--------------------|-----------------------|--------------------------------------|-------------------|-----------------------------|
| 1                  | 134.4, C              |                                      |                   |                             |
| 2                  | 131.6, CH             | 7.88, s                              |                   | 1 <sup>w</sup> , 3, 4, 6, 7 |
| 3                  | 118.0, C              |                                      |                   |                             |
| 4                  | 153.9, C              |                                      |                   |                             |
| 4-OCH <sub>3</sub> | 60.6, CH <sub>3</sub> | 3.81, s                              |                   | 4                           |
| 5                  | 118.0, C              |                                      |                   |                             |
| 6                  | 131.6, CH             | 7.88, s                              |                   | 1 <sup>w</sup> , 2, 4, 5, 7 |
| 7                  | 135.7, CH             | 7.32, d (15.8)                       | 8                 | 1, 2, 6, 8 <sup>w</sup> , 9 |
| 8                  | 124.6, CH             | 6.65, d (15.8)                       | 7                 | 1, 7, 9                     |
| 9                  | 166.1, C              |                                      |                   |                             |
| 9-NH <sub>2</sub>  |                       | 7.19, brs                            | 9-NH <sub>2</sub> | 8                           |
|                    |                       | 7.46, brs                            | 9-NH <sub>2</sub> |                             |

<sup>a</sup>Spectra recorded at 25 °C (800 MHz for <sup>1</sup>H NMR and 200 MHz for <sup>13</sup>C NMR).

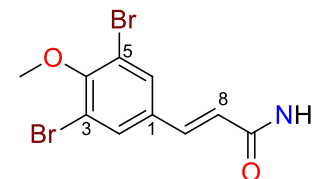

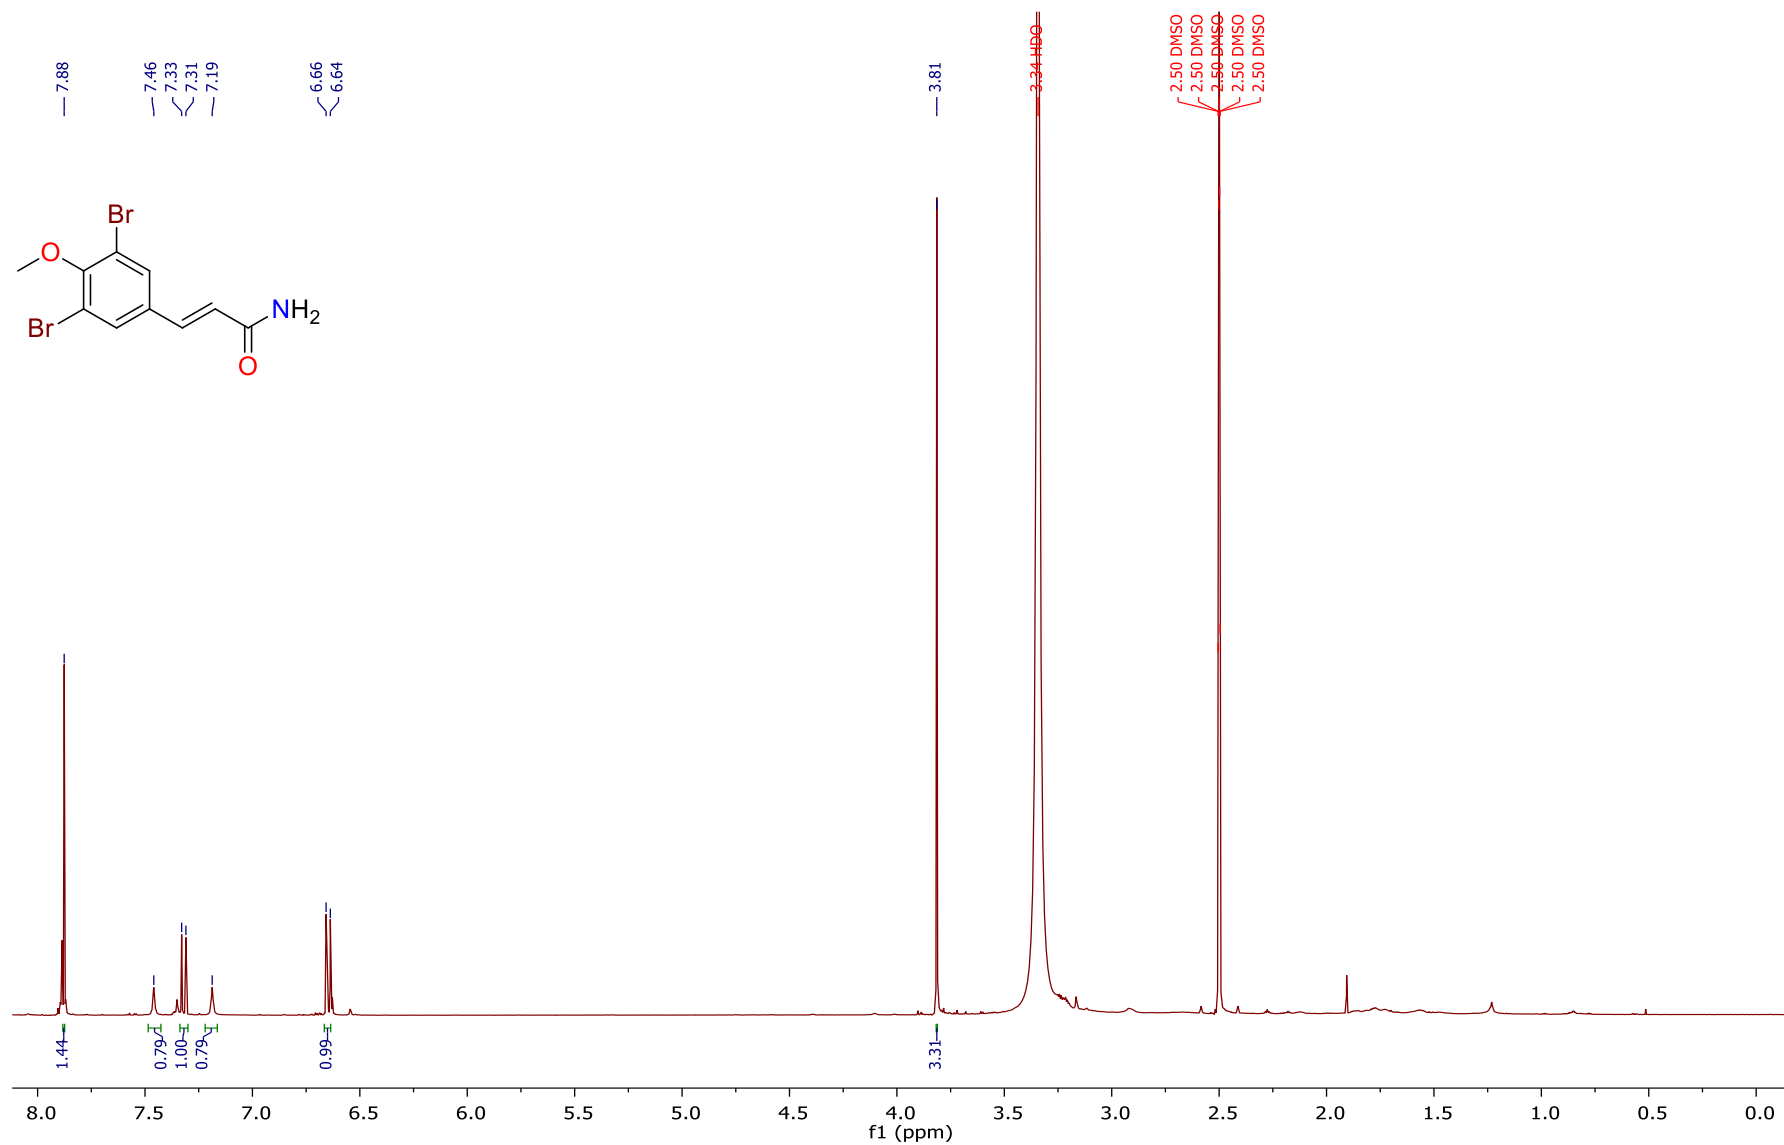

**Figure S13:** <sup>1</sup>H NMR (800 MHz) spectrum of ianthelliformisamine F (6) in DMSO-*d*<sub>6</sub>

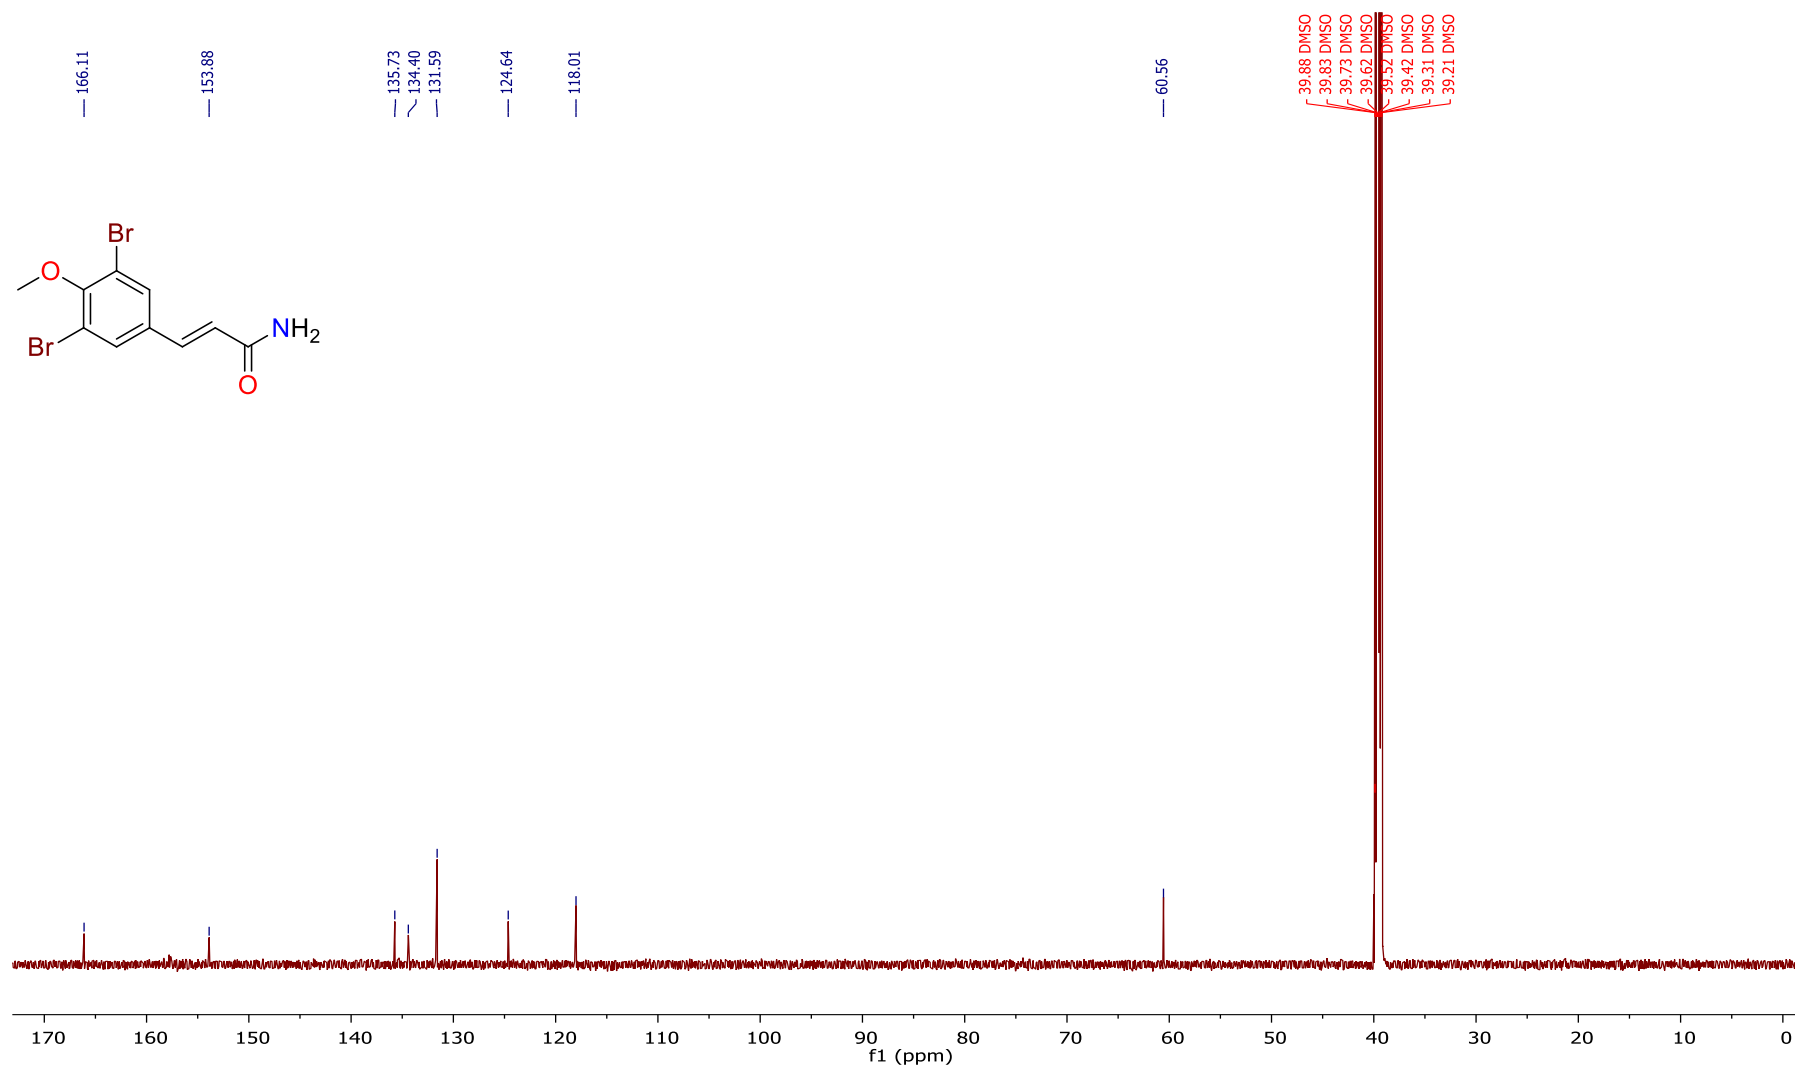

**Figure S14:** <sup>13</sup>C NMR (200 MHz) spectrum of ianthelliformisamine F (**6**) in DMSO-*d*<sub>6</sub>

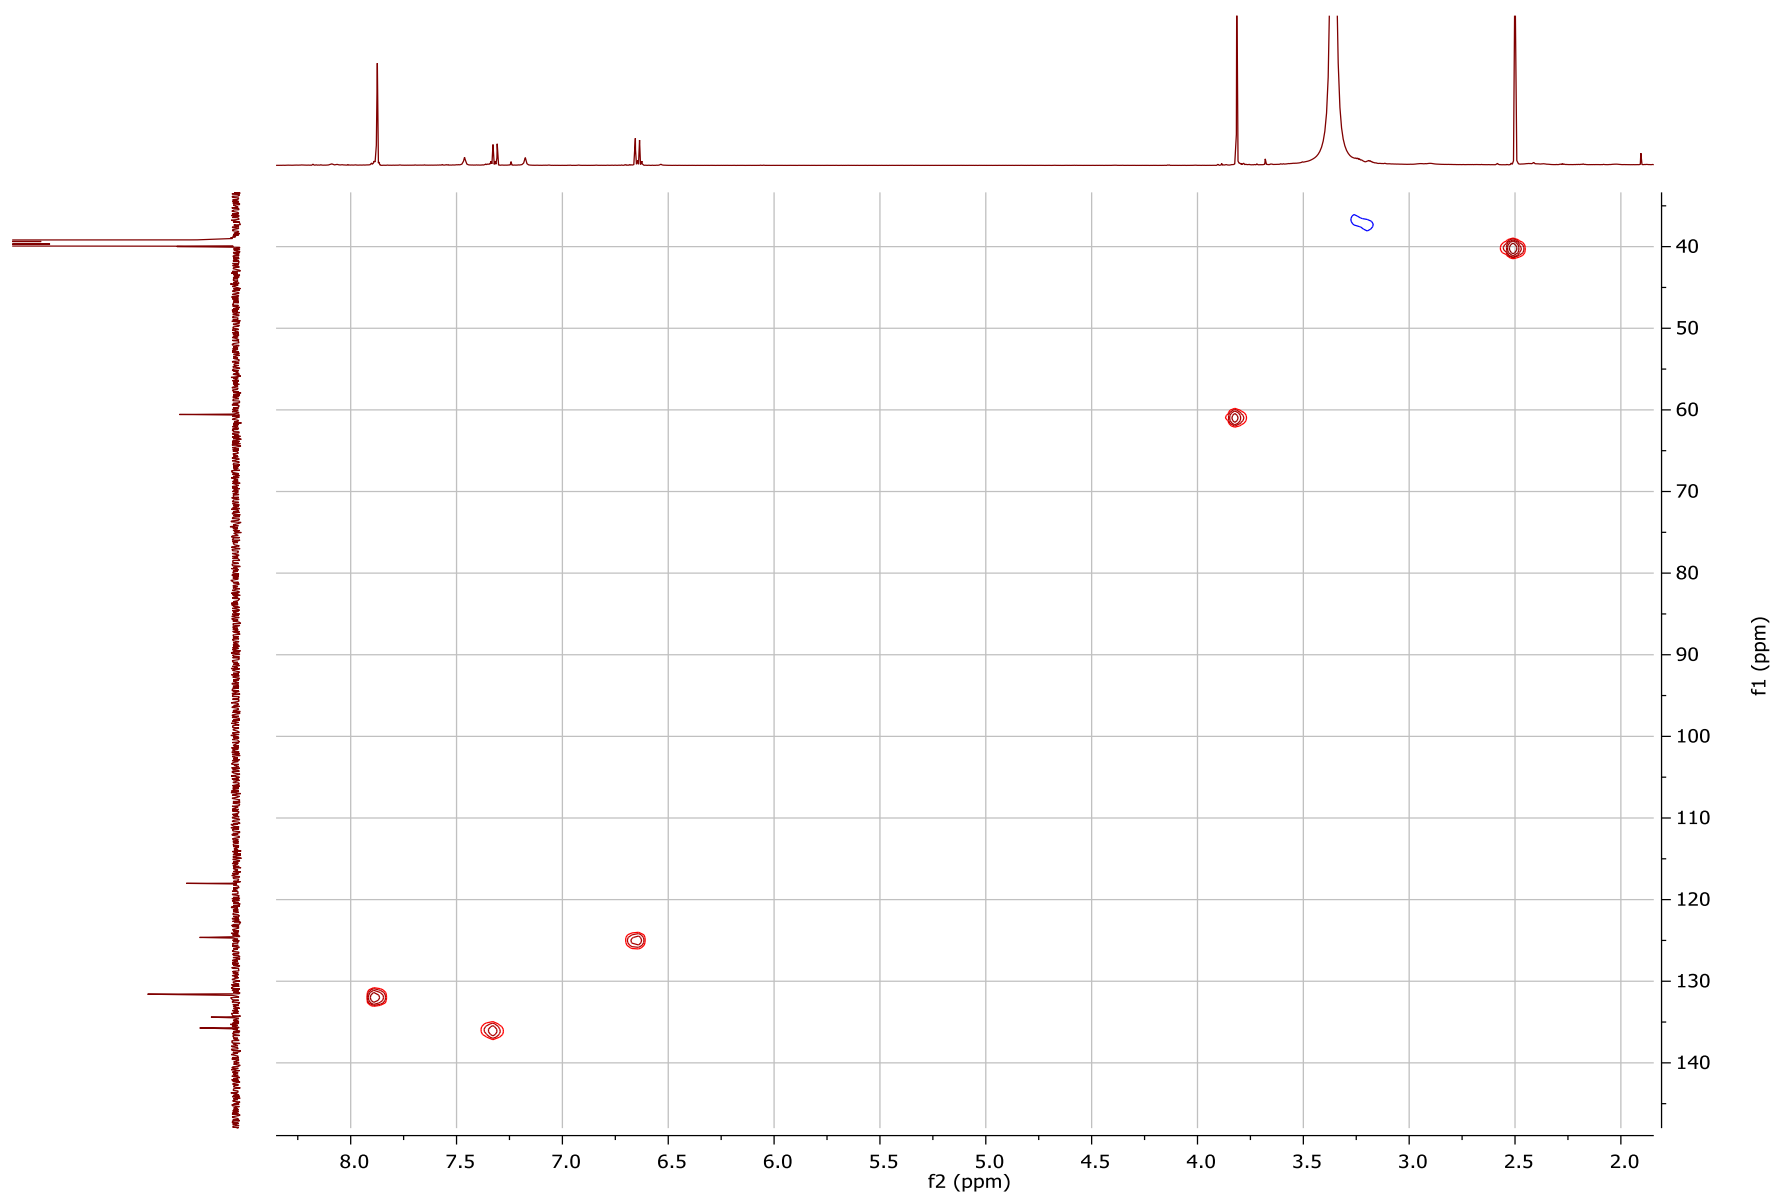

Figure S15: HSQC spectrum of ianthelliformisamine F (**6**) in DMSO-*d*<sub>6</sub>

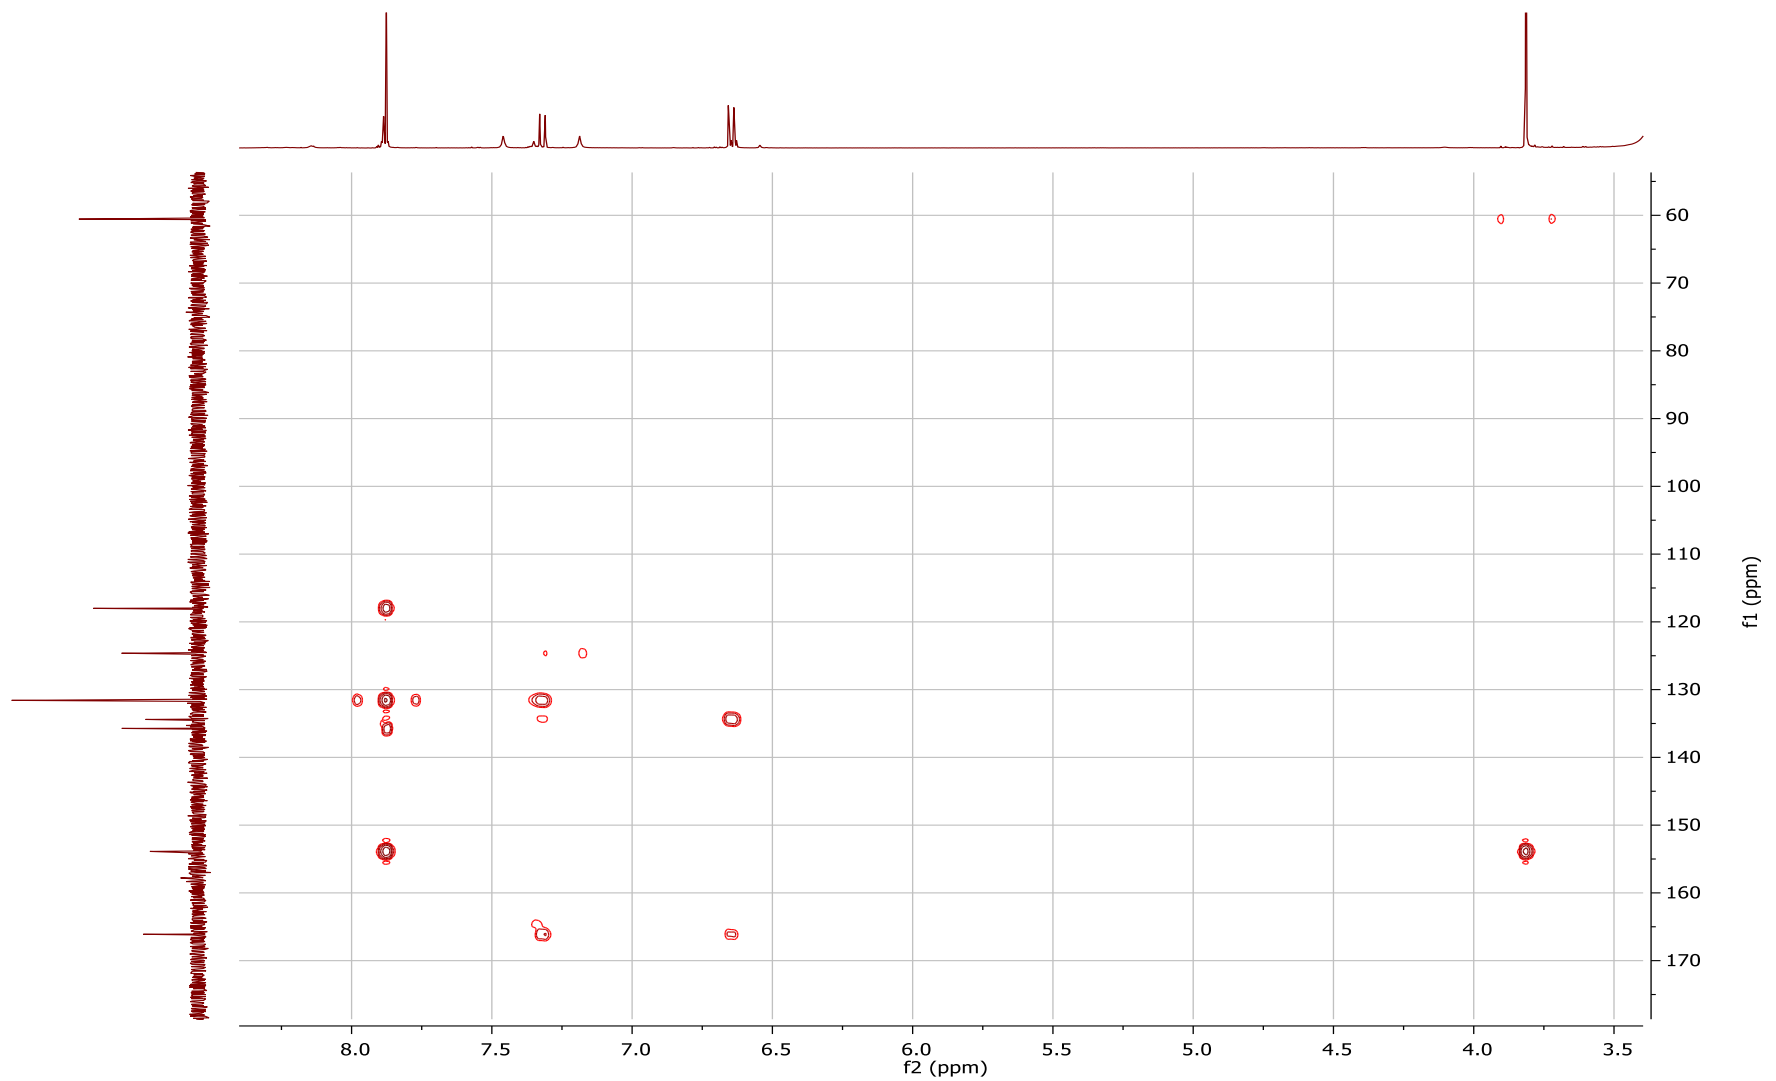

**Figure S16:** HMBC spectrum of ianthelliformisamine F (**6**) in DMSO-*d*<sub>6</sub>

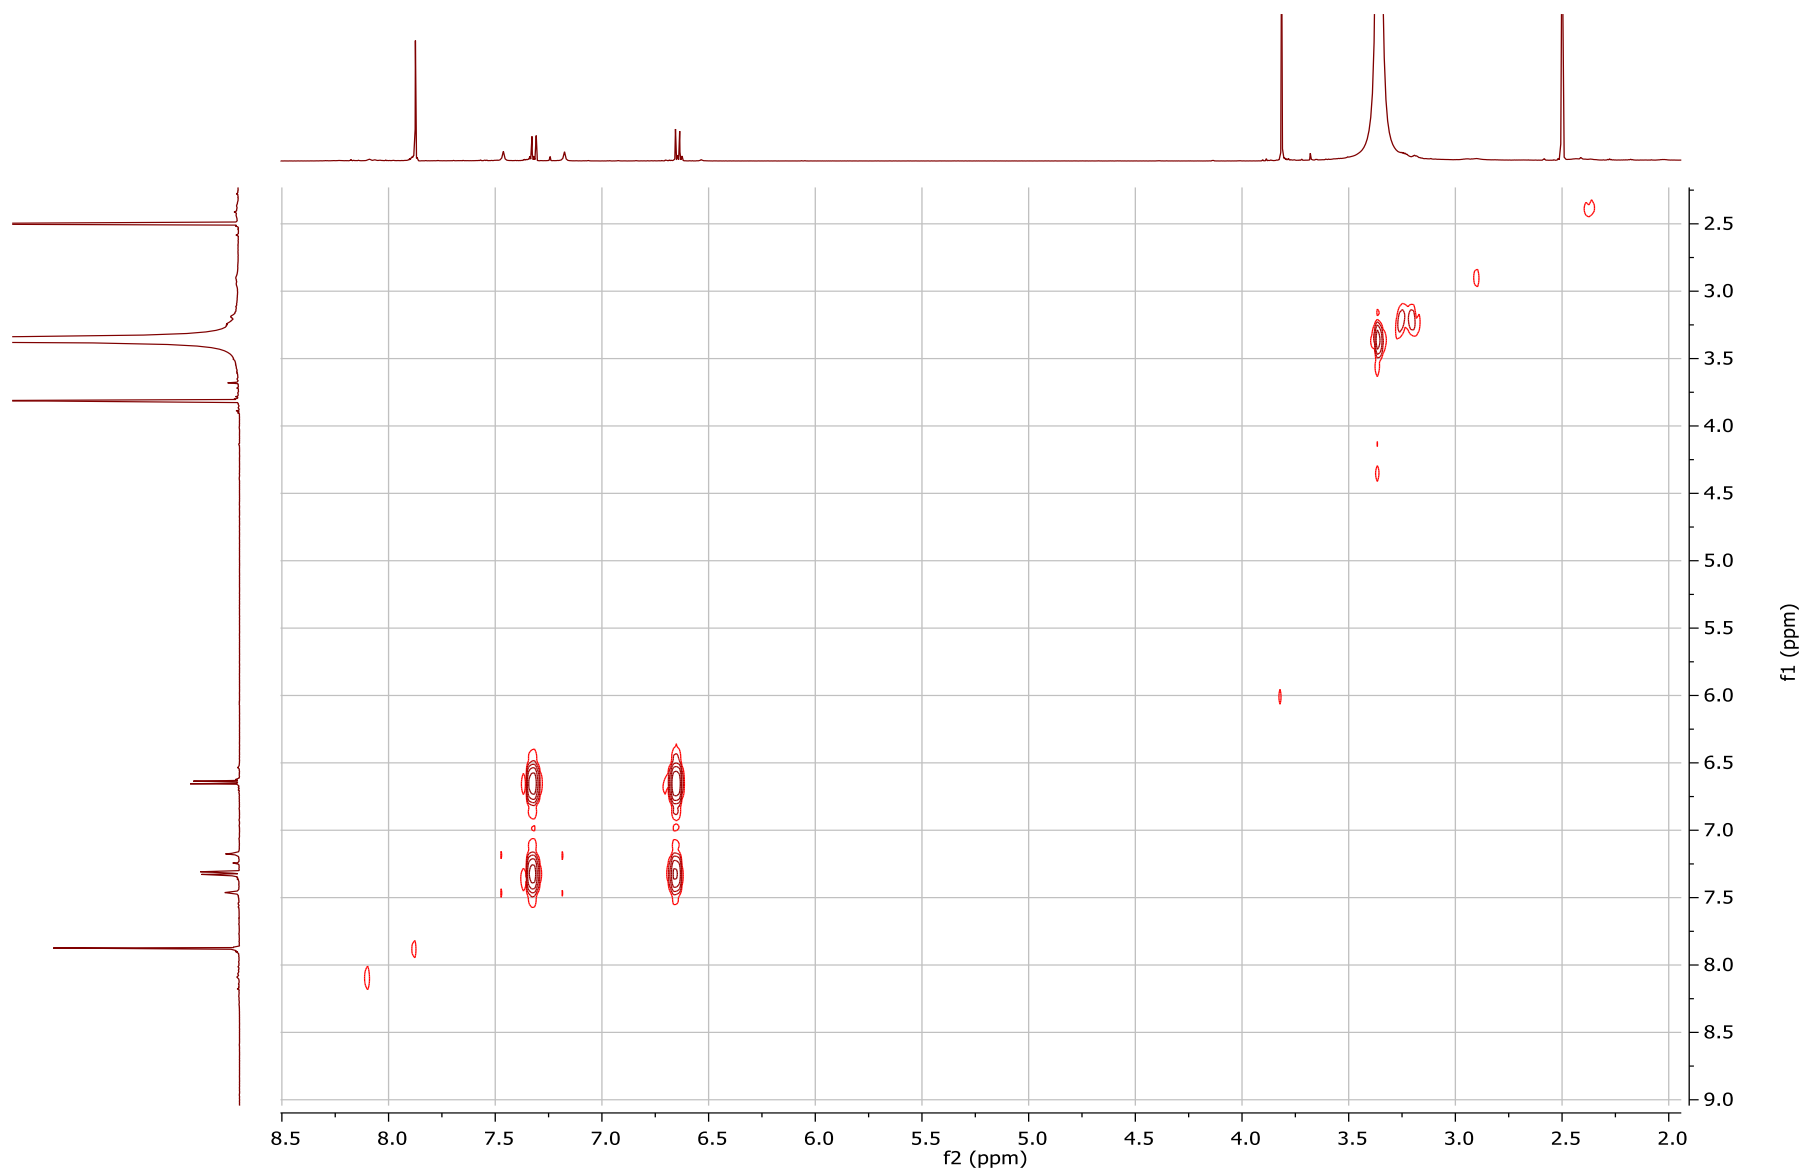

**Figure S17:** COSY spectrum of ianthelliformisamine F (**6**) in DMSO-*d*<sub>6</sub>

**Table S4:** NMR data table for ianthelliformisamine G (**7**) in DMSO- $d_6^{a, b}$ 

| position           | $\delta_C$ , type     | $\delta_H$ , mult. (J in Hz) | COSY     | HMBC                                      |
|--------------------|-----------------------|------------------------------|----------|-------------------------------------------|
| 1                  | 134.3, C              |                              |          |                                           |
| 2                  | 131.6, CH             | 7.89, s                      |          | 3, 4, 6, 7                                |
| 3                  | 118.0, C              |                              |          |                                           |
| 4                  | 153.9, C              |                              |          |                                           |
| 4-OCH <sub>3</sub> | 60.6, CH <sub>3</sub> | 3.82, s                      |          | 4                                         |
| 5                  | 118.0, C              |                              |          |                                           |
| 6                  | 131.6, CH             | 7.89, s                      |          | 2, 4, 5, 7                                |
| 7                  | 135.4, CH             | 7.35, d (15.8)               | 8        | 1 <sup>w</sup> , 2, 6, 8 <sup>w</sup> , 9 |
| 8                  | 124.2, CH             | 6.65, d (15.8)               | 7        | 1, 9                                      |
| 9                  | 164.9, C              |                              |          |                                           |
| 9-NH               |                       | 8.23, t (5.8)                | 10       | 9 <sup>w</sup>                            |
| 10                 | 35.9, CH <sub>2</sub> | 3.25, dt (5.8, 6.8)          | 9-NH, 11 | 9, 11 <sup>w</sup> , 12 <sup>w</sup>      |
| 11                 | 27.5, CH <sub>2</sub> | 1.73, tt (6.8, 7.5)          | 10, 12   | 10, 12                                    |
| 12                 | 36.9, CH <sub>2</sub> | 2.81, m                      | 11       | 10 <sup>w</sup> , 11 <sup>w</sup>         |
| 12-NH <sub>2</sub> |                       | 7.73, brs                    |          |                                           |

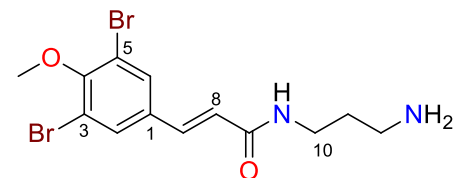

<sup>a</sup>Spectra recorded at 25 °C (800 MHz for <sup>1</sup>H NMR and 200 MHz for <sup>13</sup>C NMR); <sup>b</sup>Isolated as a TFA salt; <sup>w</sup>Weak correlation.



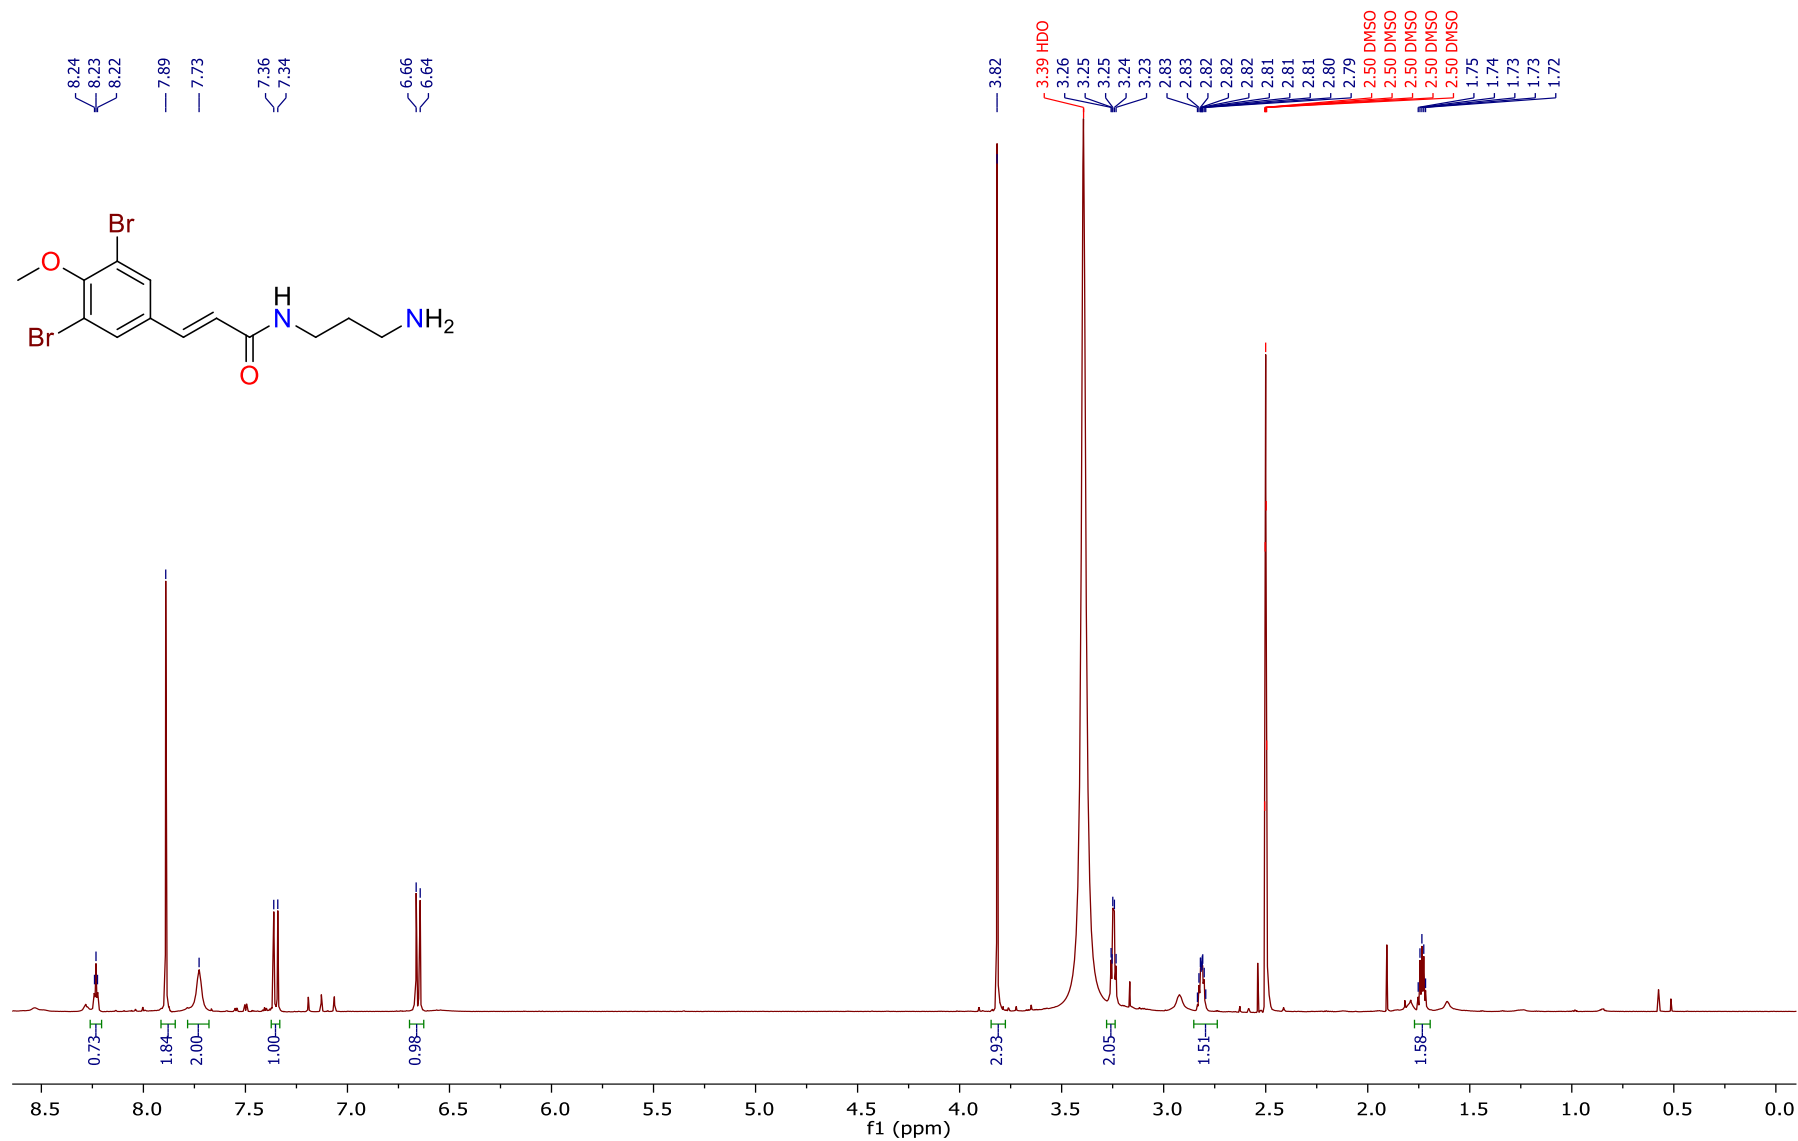

**Figure S18:** <sup>1</sup>H NMR (800 MHz) spectrum of ianthelliformisamine G (7) in DMSO-*d*<sub>6</sub>

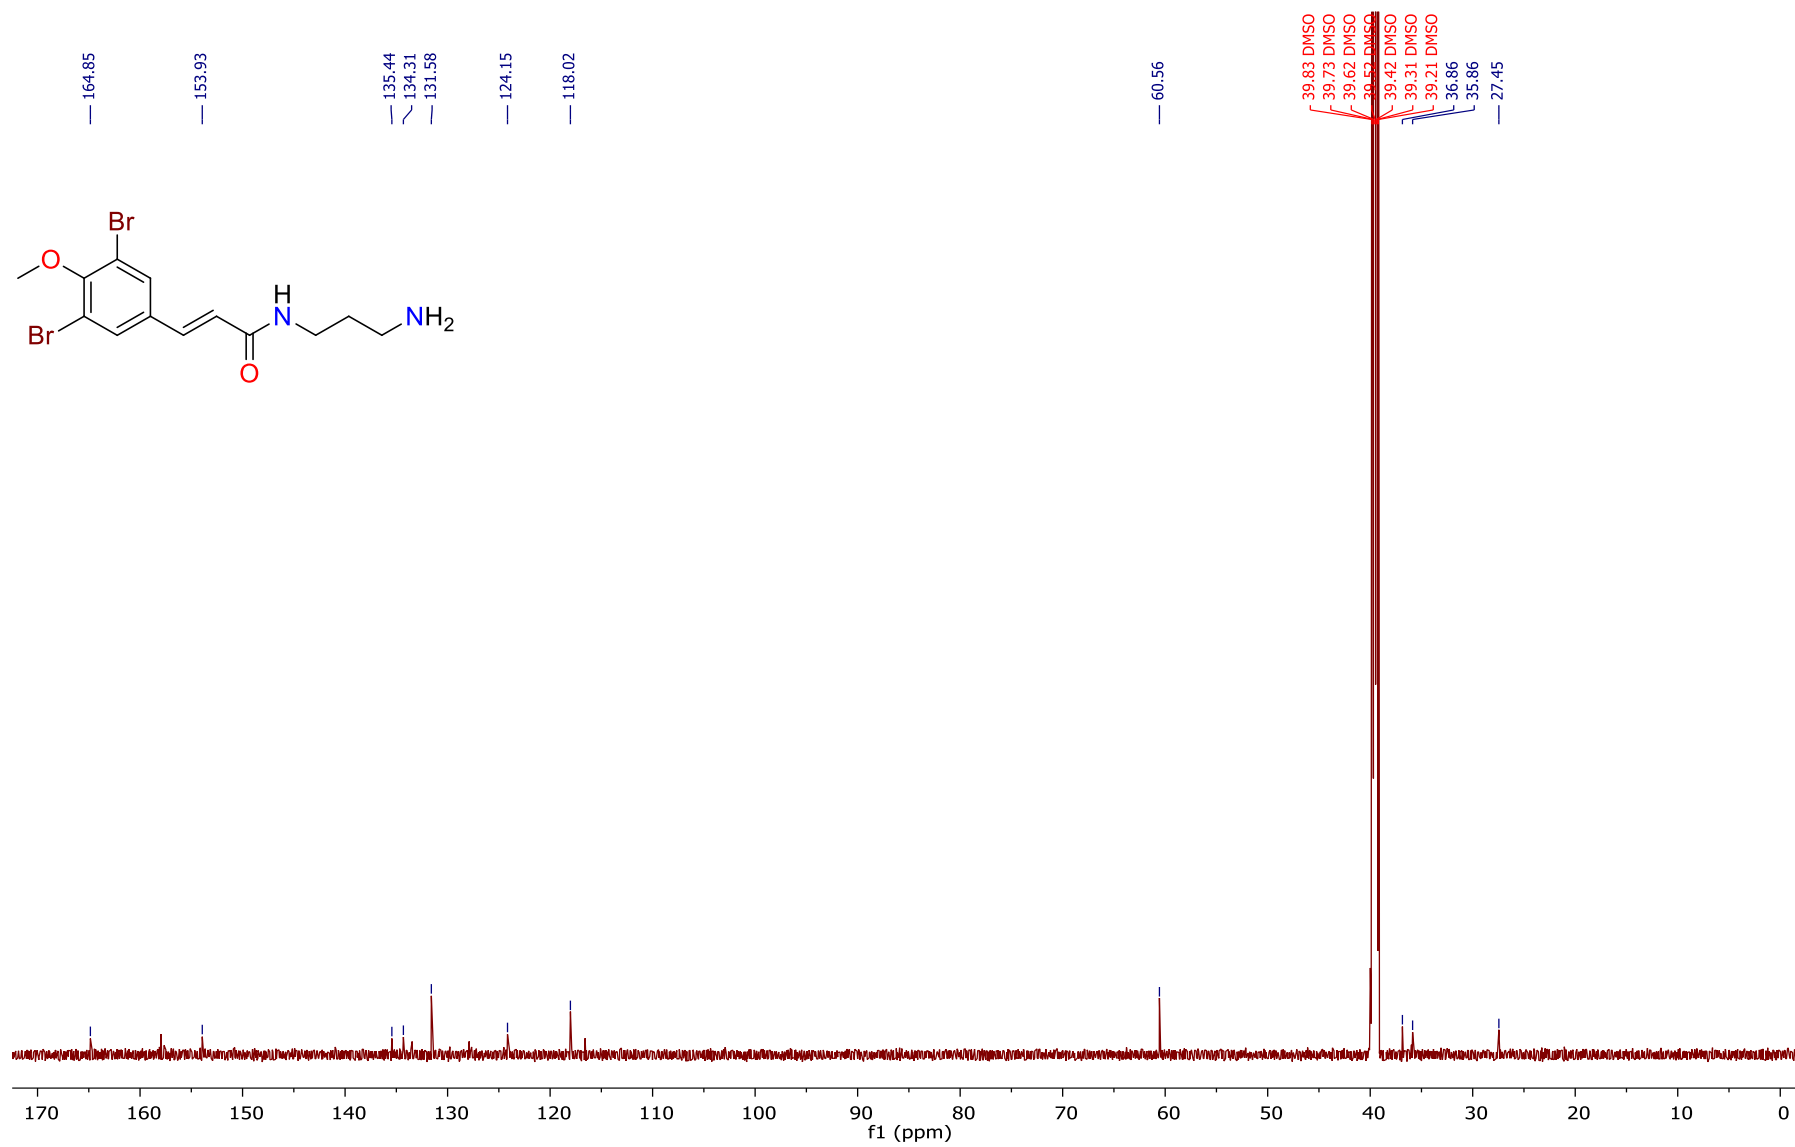

**Figure S19:**  $^{13}\text{C}$  NMR (200 MHz) spectrum of ianthelliformisamine G (7) in  $\text{DMSO-}d_6$

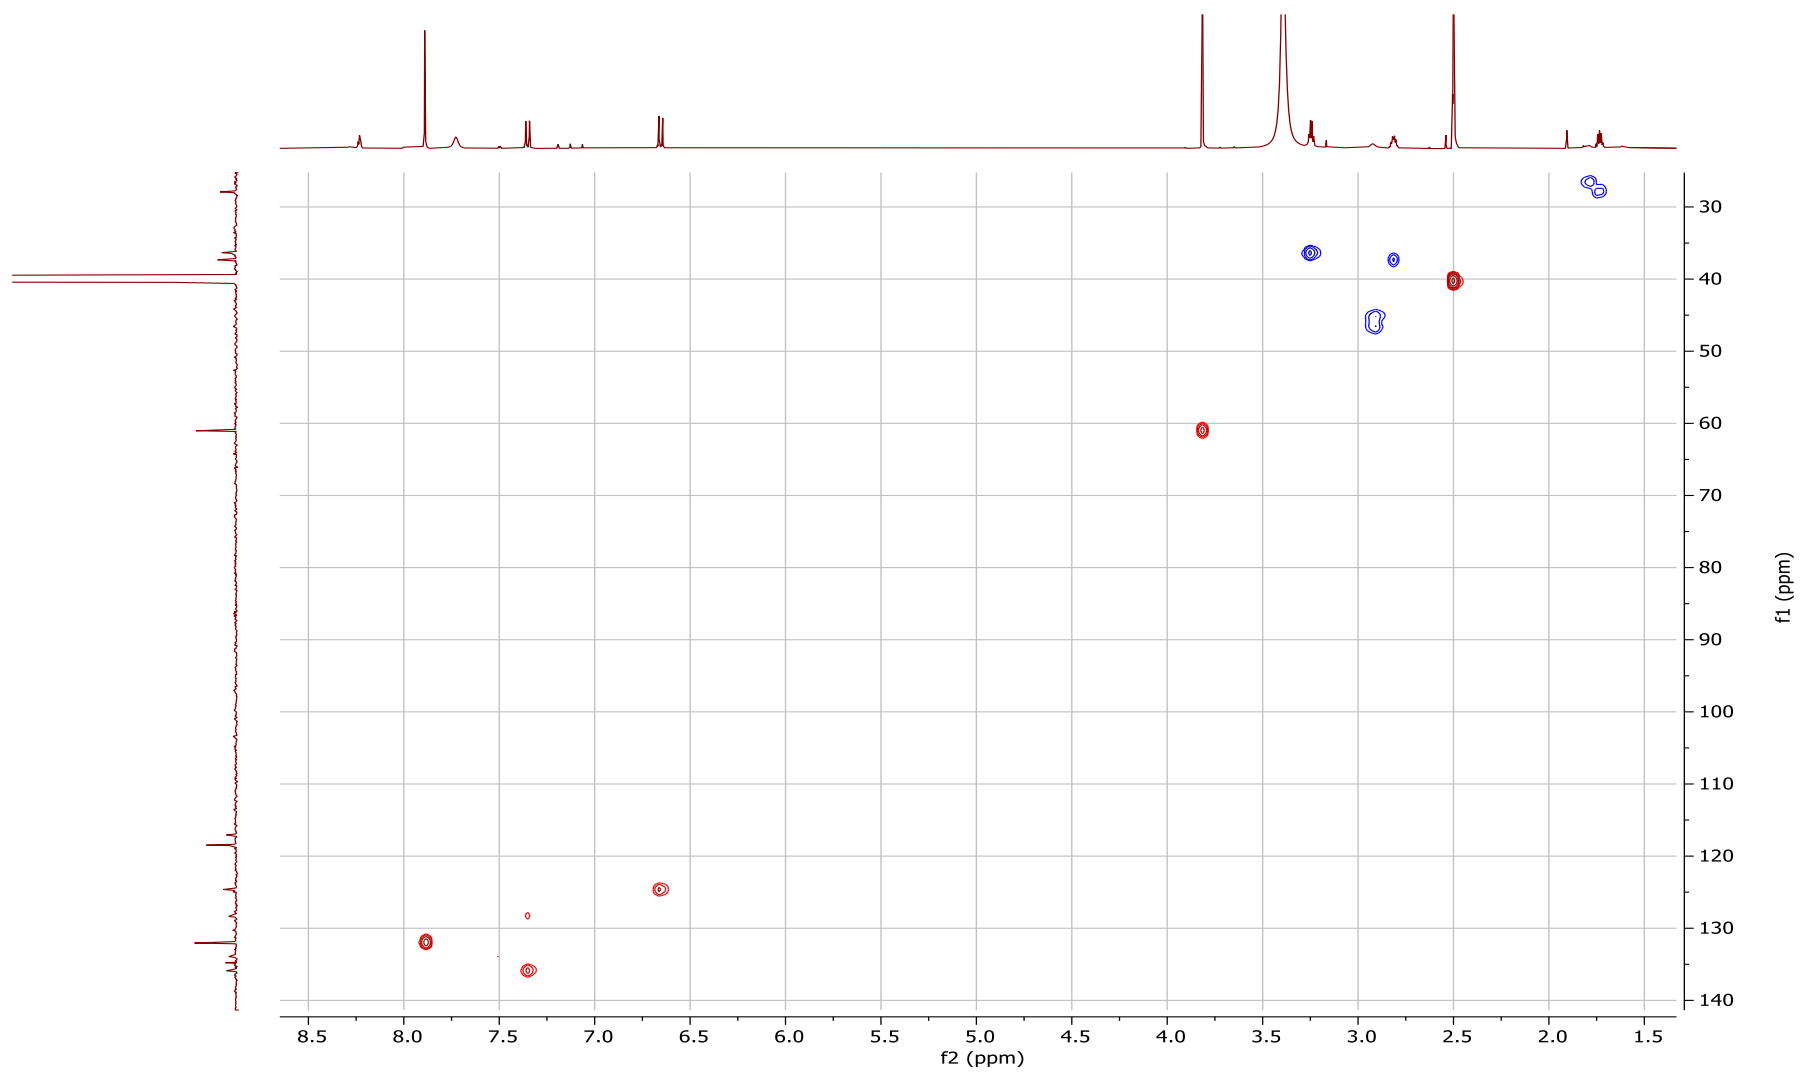

**Figure S20:** HSQC spectrum of ianthelliformisamine G (**7**) in DMSO-*d*<sub>6</sub>

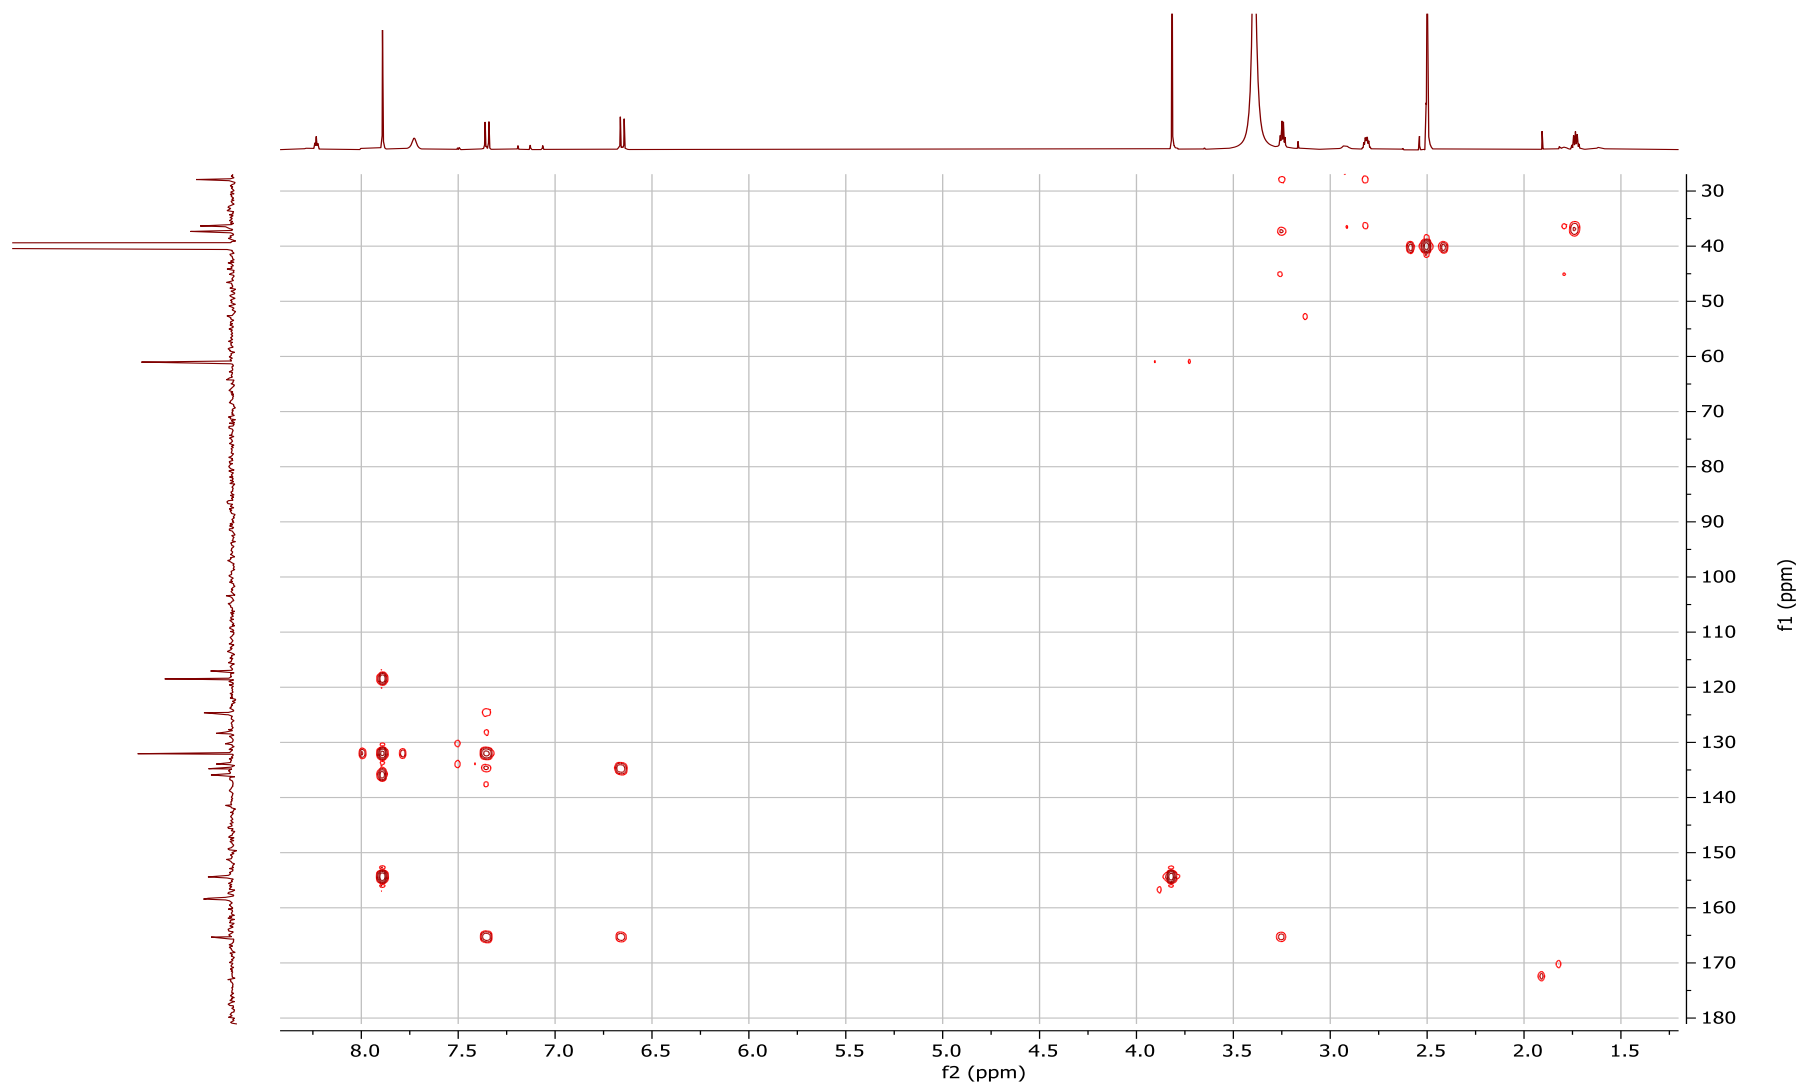

**Figure S21:** HMBC spectrum of ianthelliformisamine G (7) in DMSO-*d*<sub>6</sub>

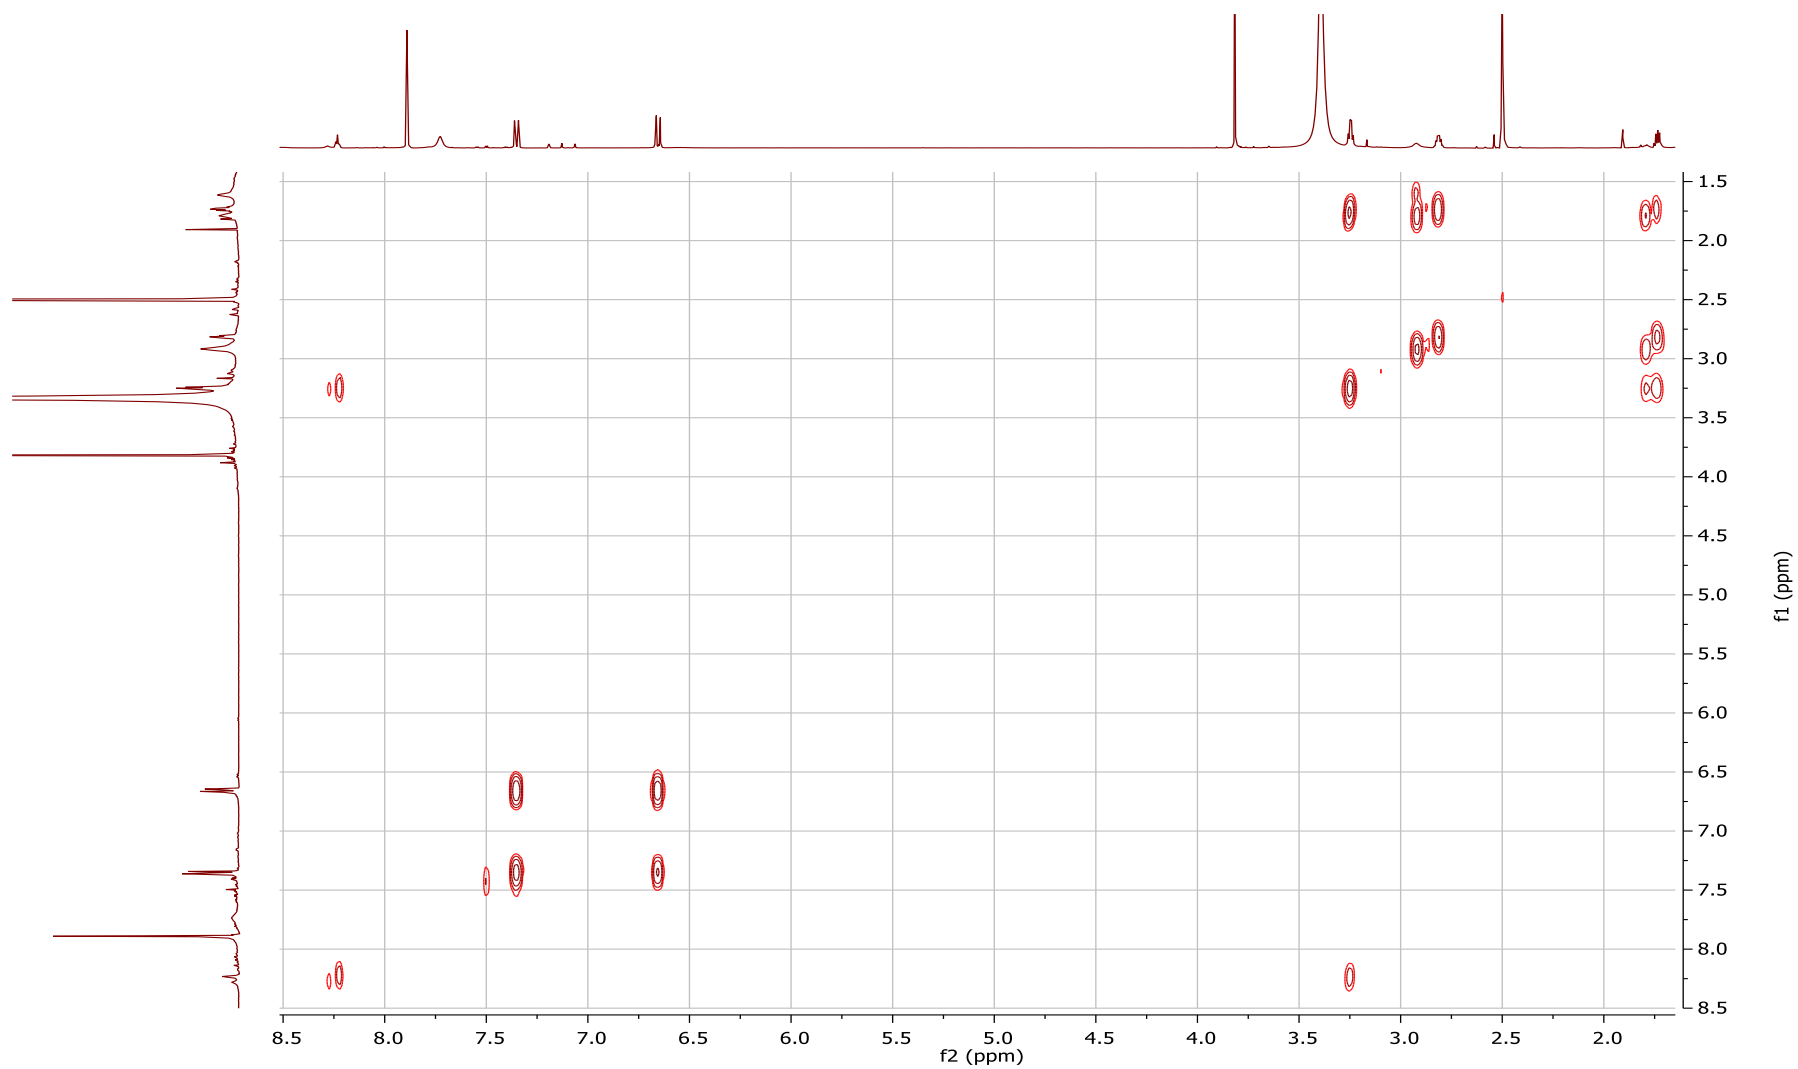

**Figure S22:** COSY spectrum of ianthelliformisamine G (7) in DMSO-*d*<sub>6</sub>

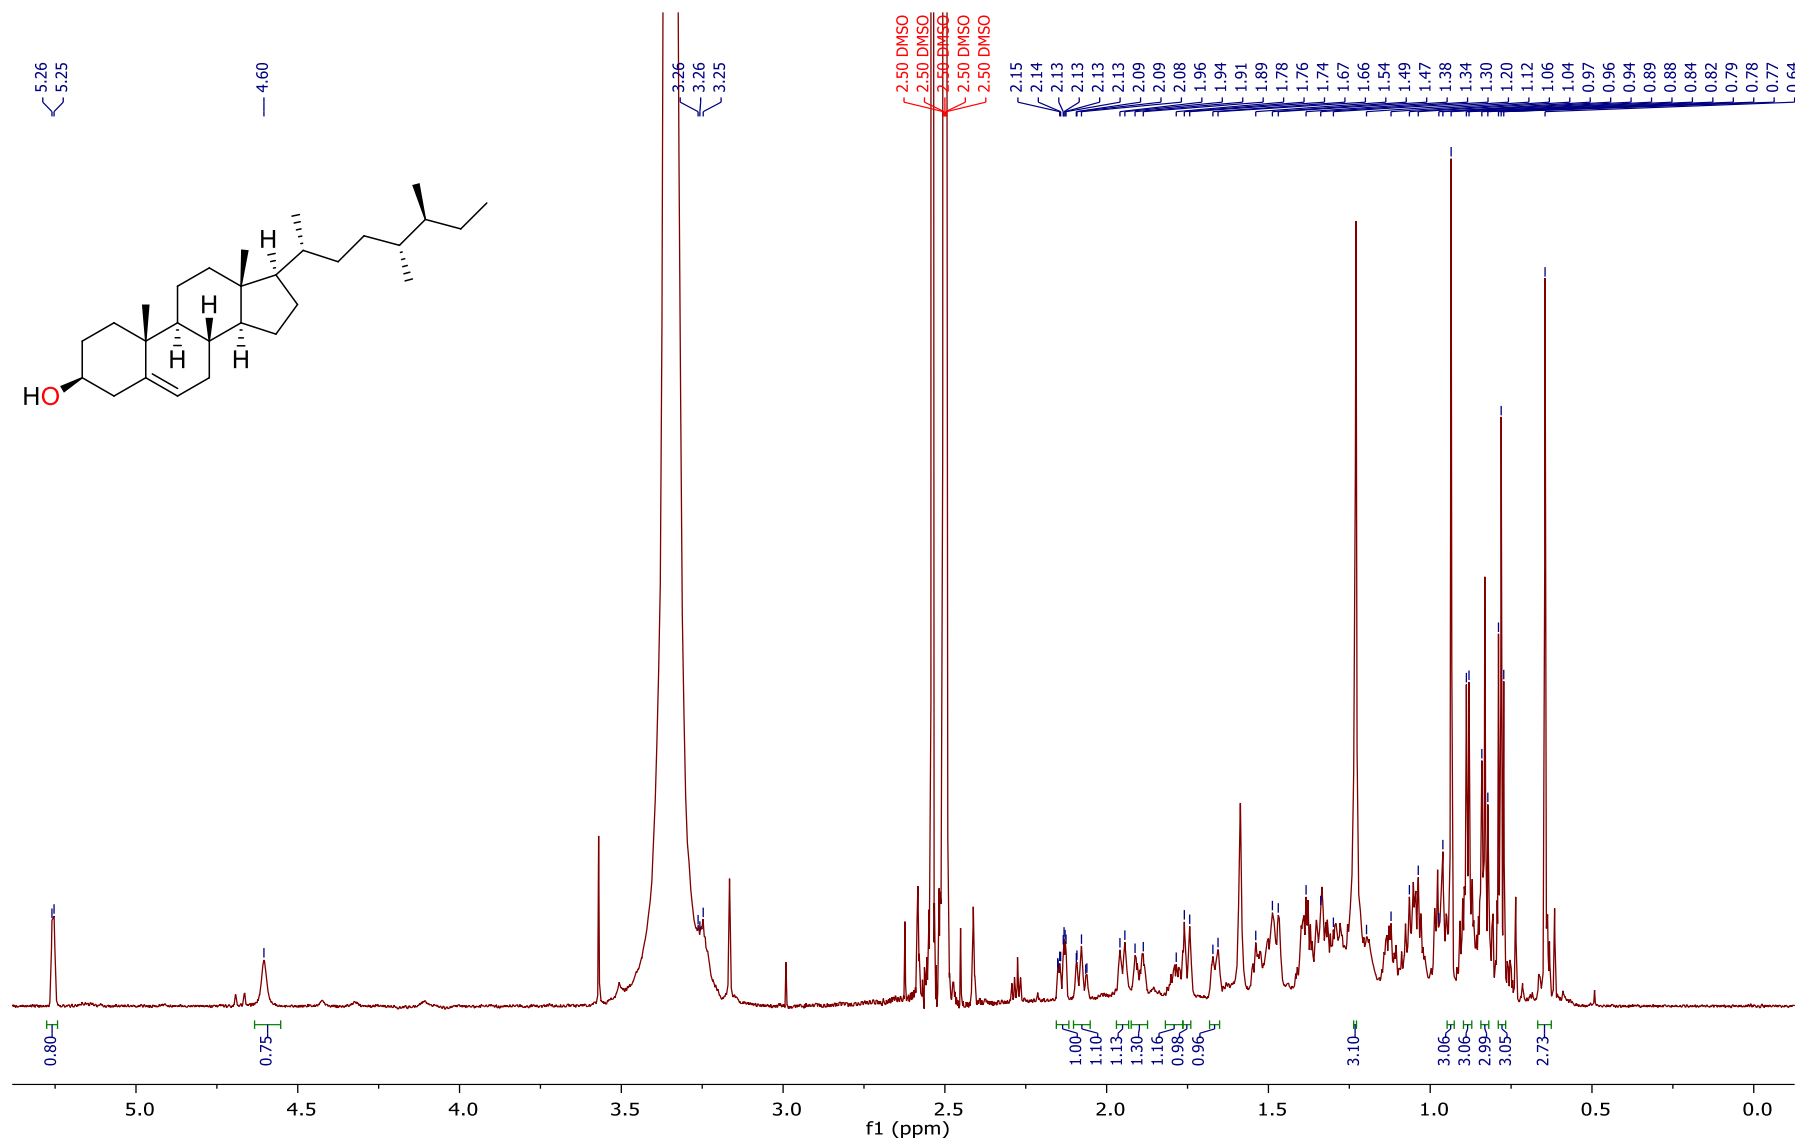

**Figure S23:** <sup>1</sup>H NMR (800 MHz) spectrum of aplysterol (**8**) in DMSO-*d*<sub>6</sub>

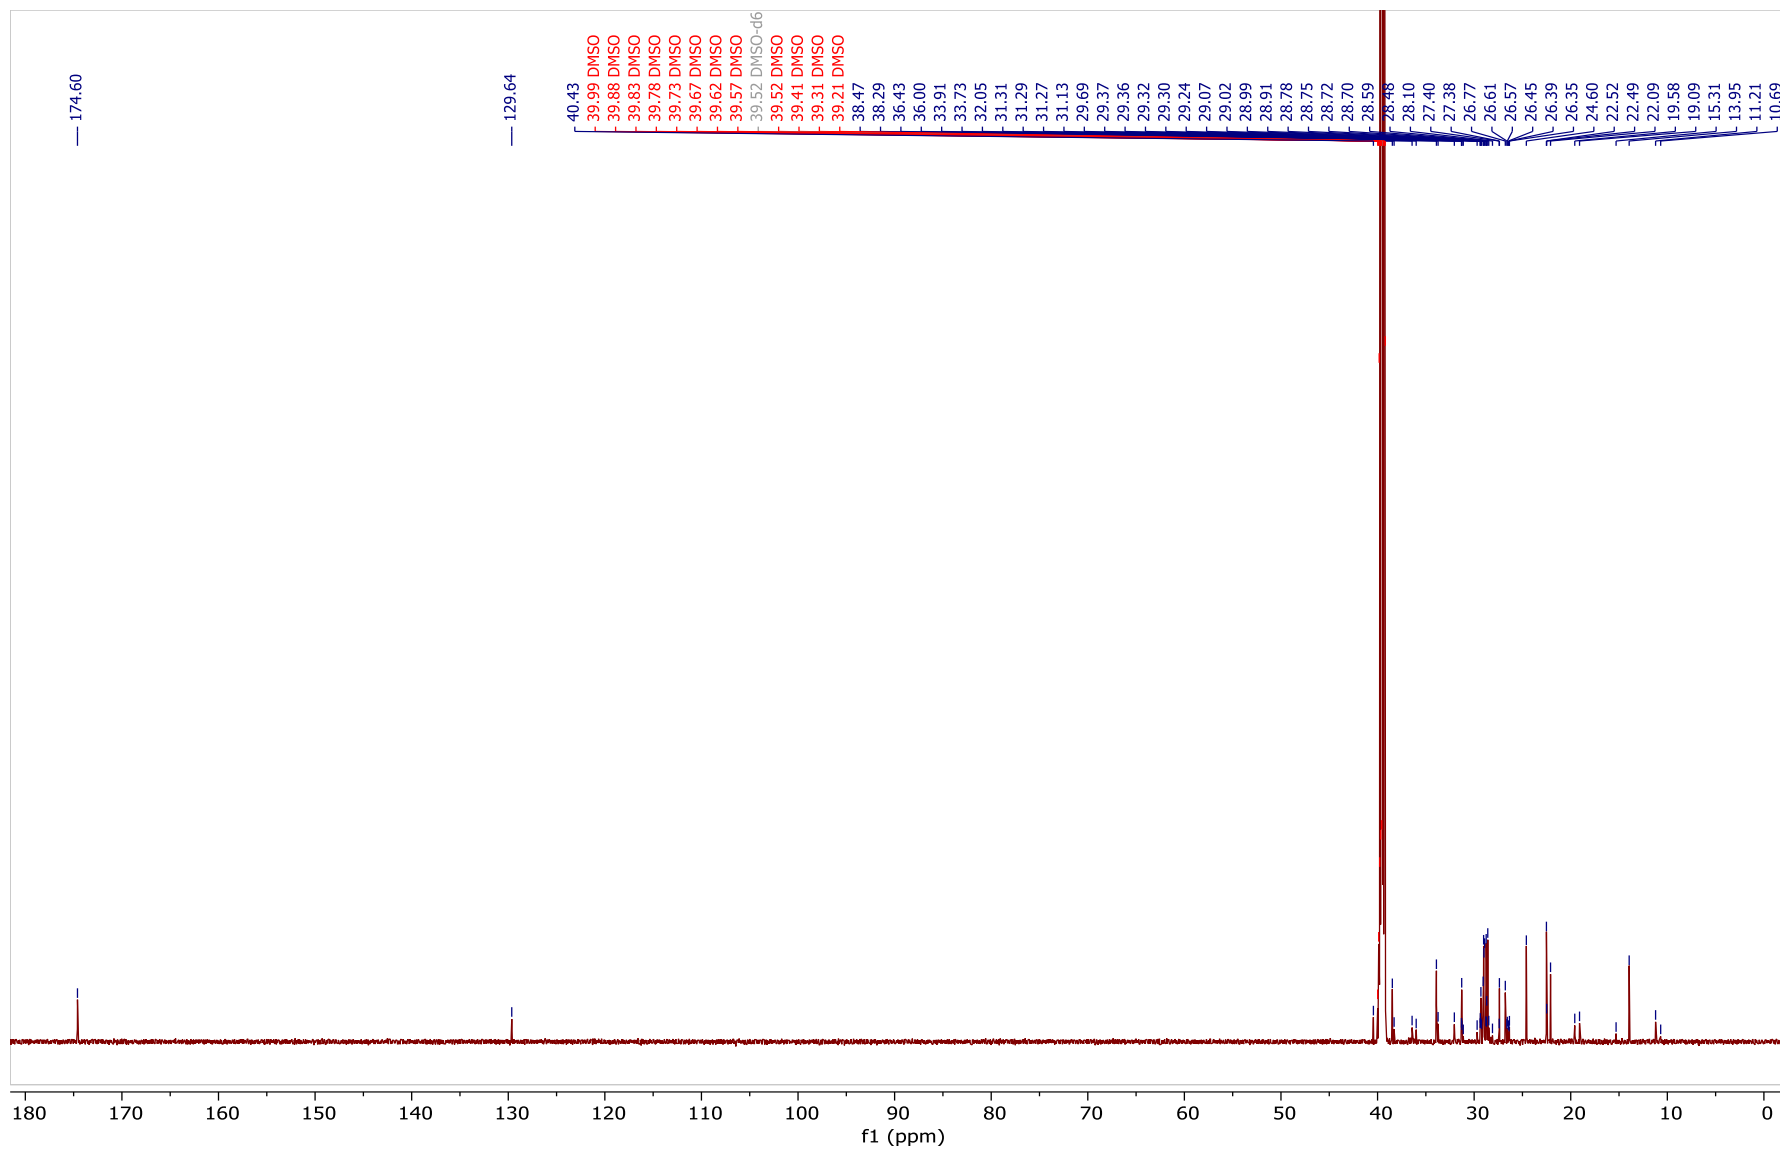

Figure S24:  $^{13}\text{C}$  NMR (200 MHz) spectrum of alysterol (**8**) in  $\text{DMSO-}d_6$

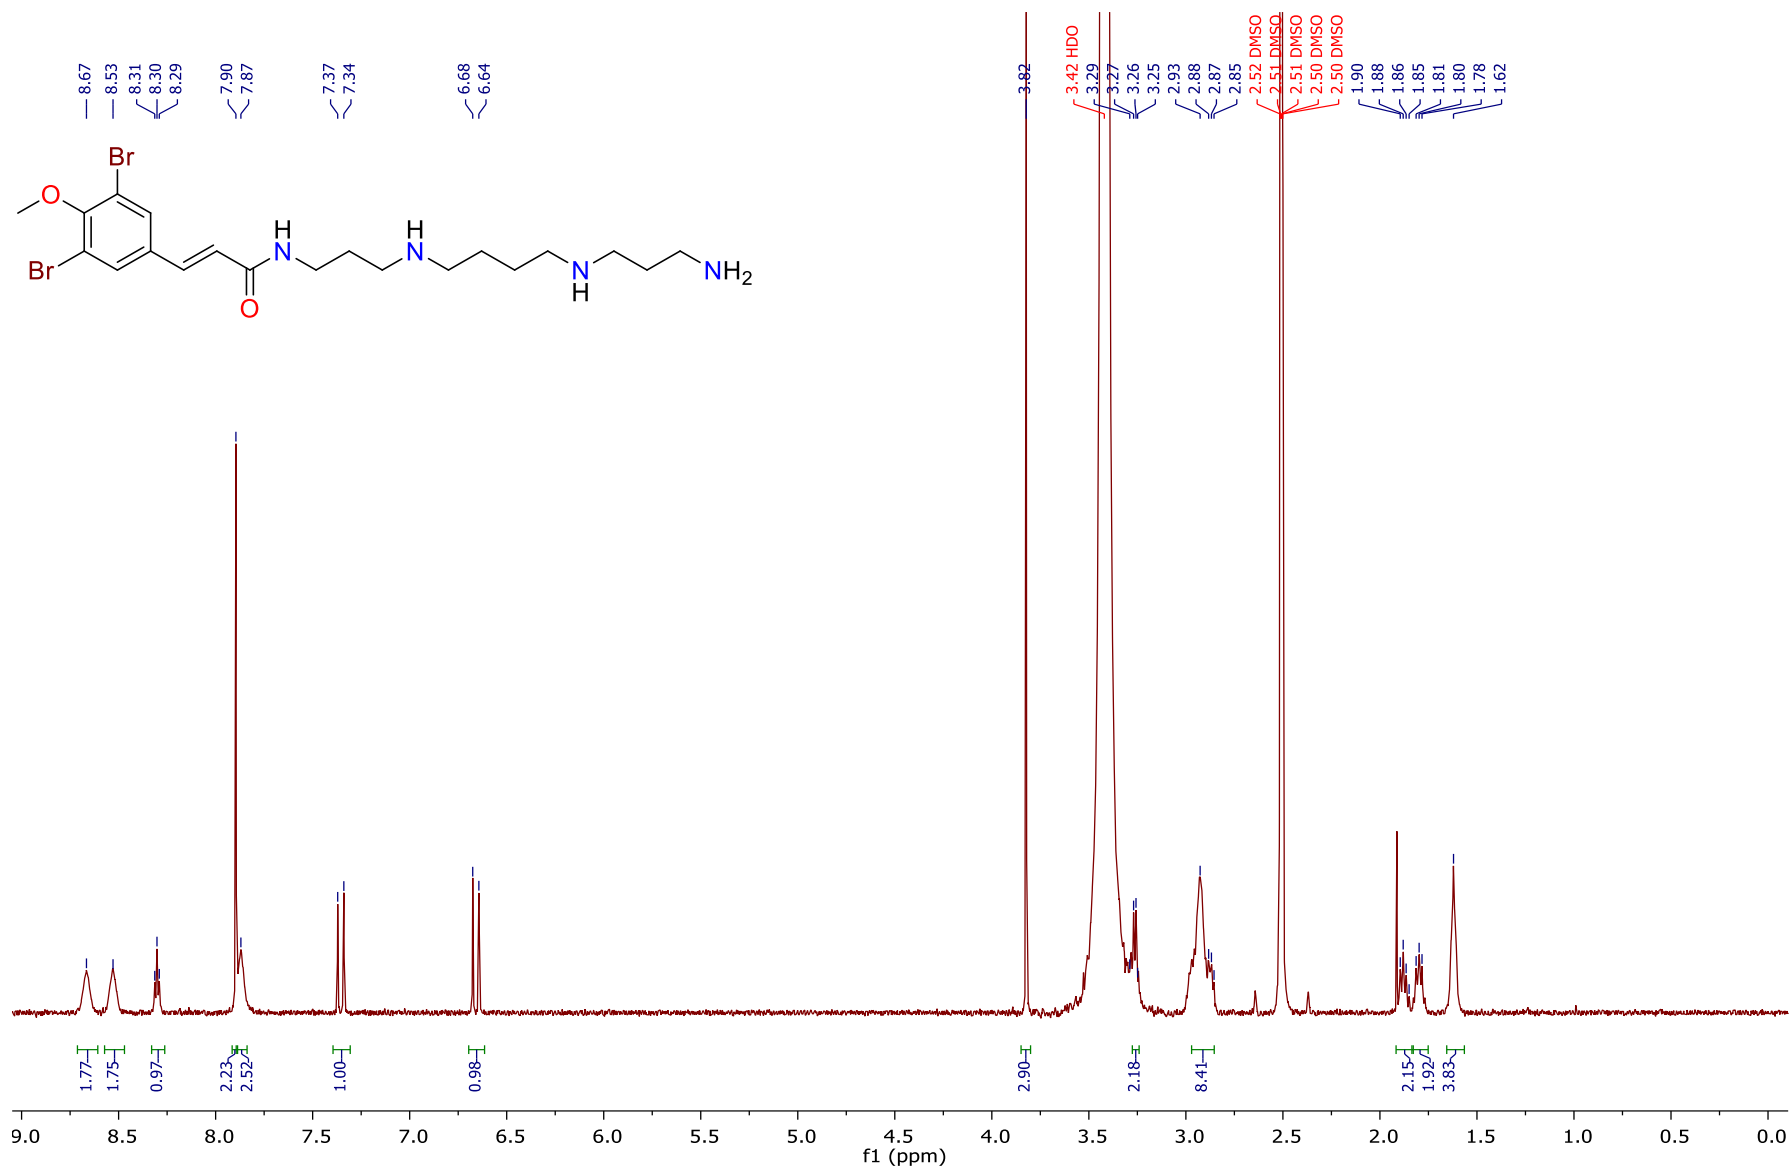

**Figure S25:** <sup>1</sup>H NMR (800 MHz) spectrum of ianthelliformisamine A (**1**) in DMSO-*d*<sub>6</sub>



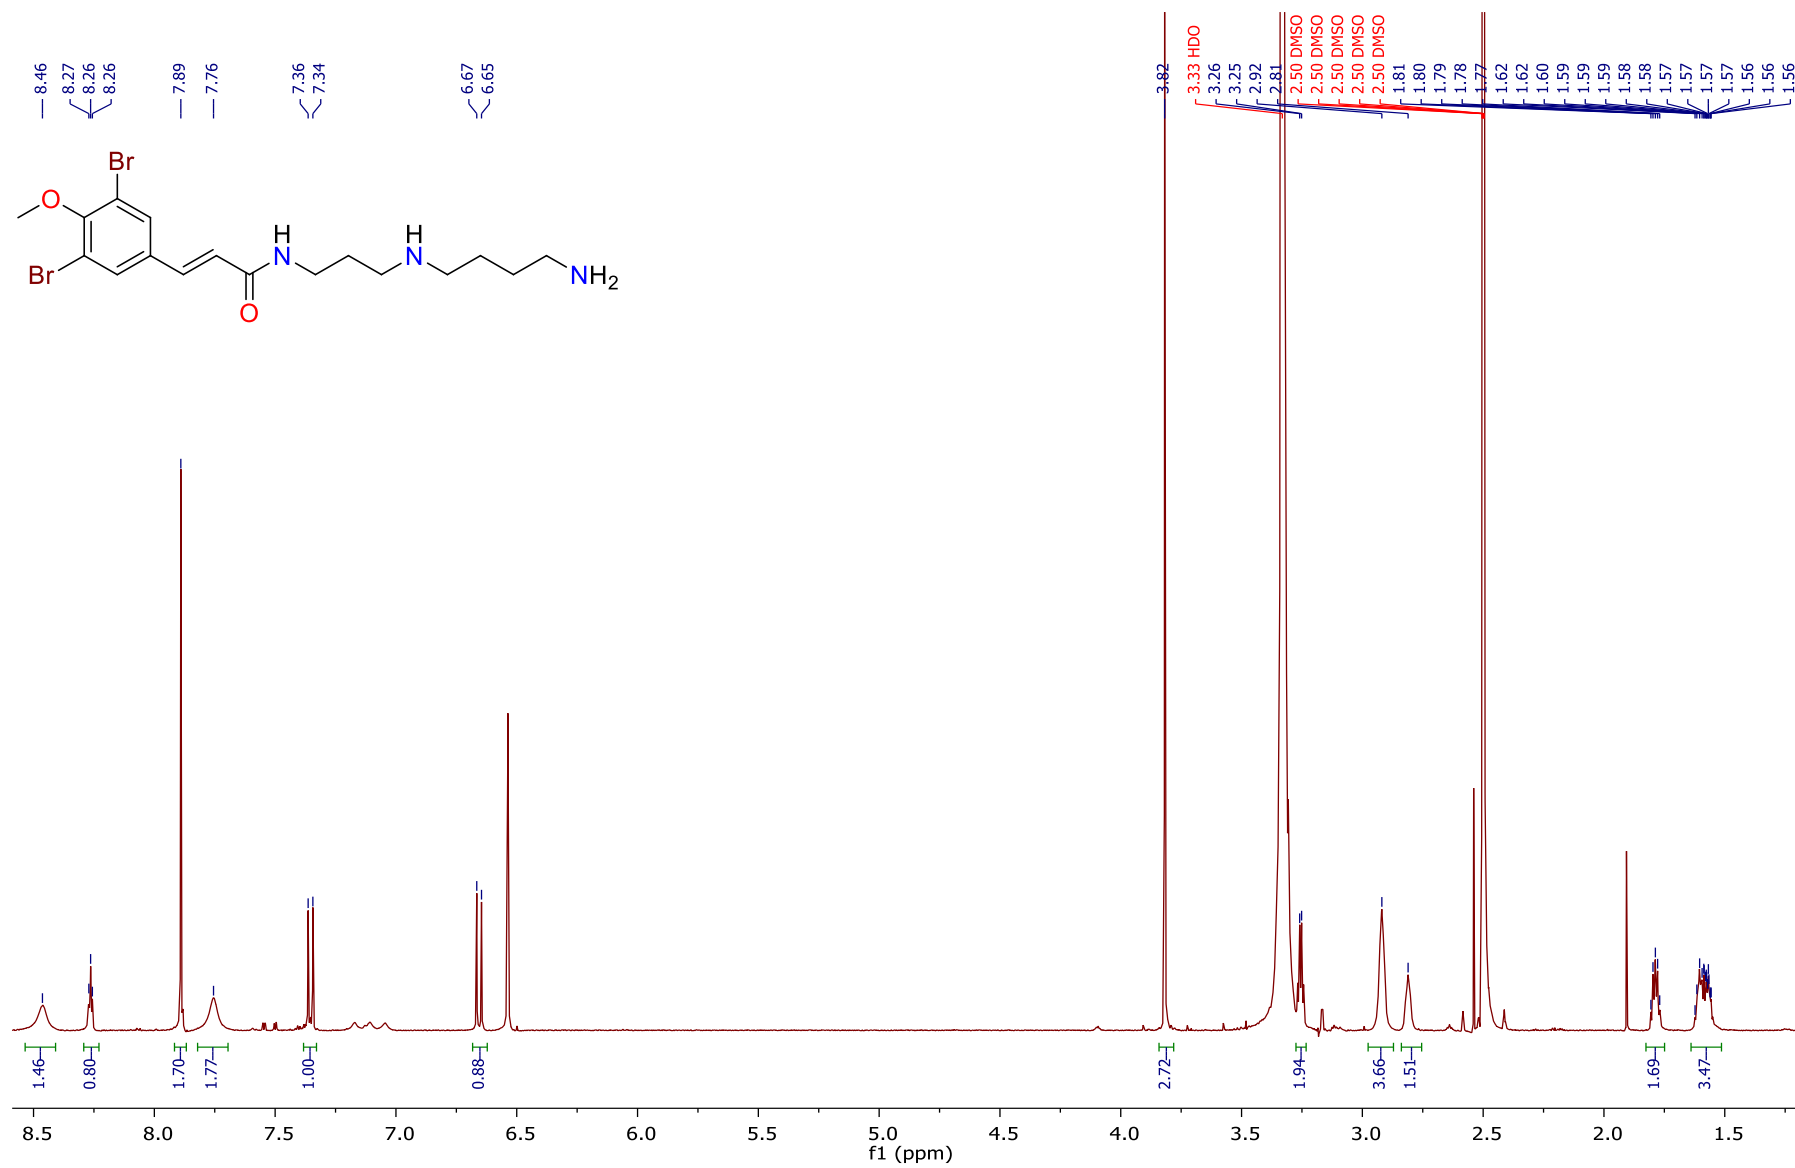

Figure S26: <sup>1</sup>H NMR (800 MHz) spectrum of ianthelliformisamine B (2) in DMSO-*d*<sub>6</sub>

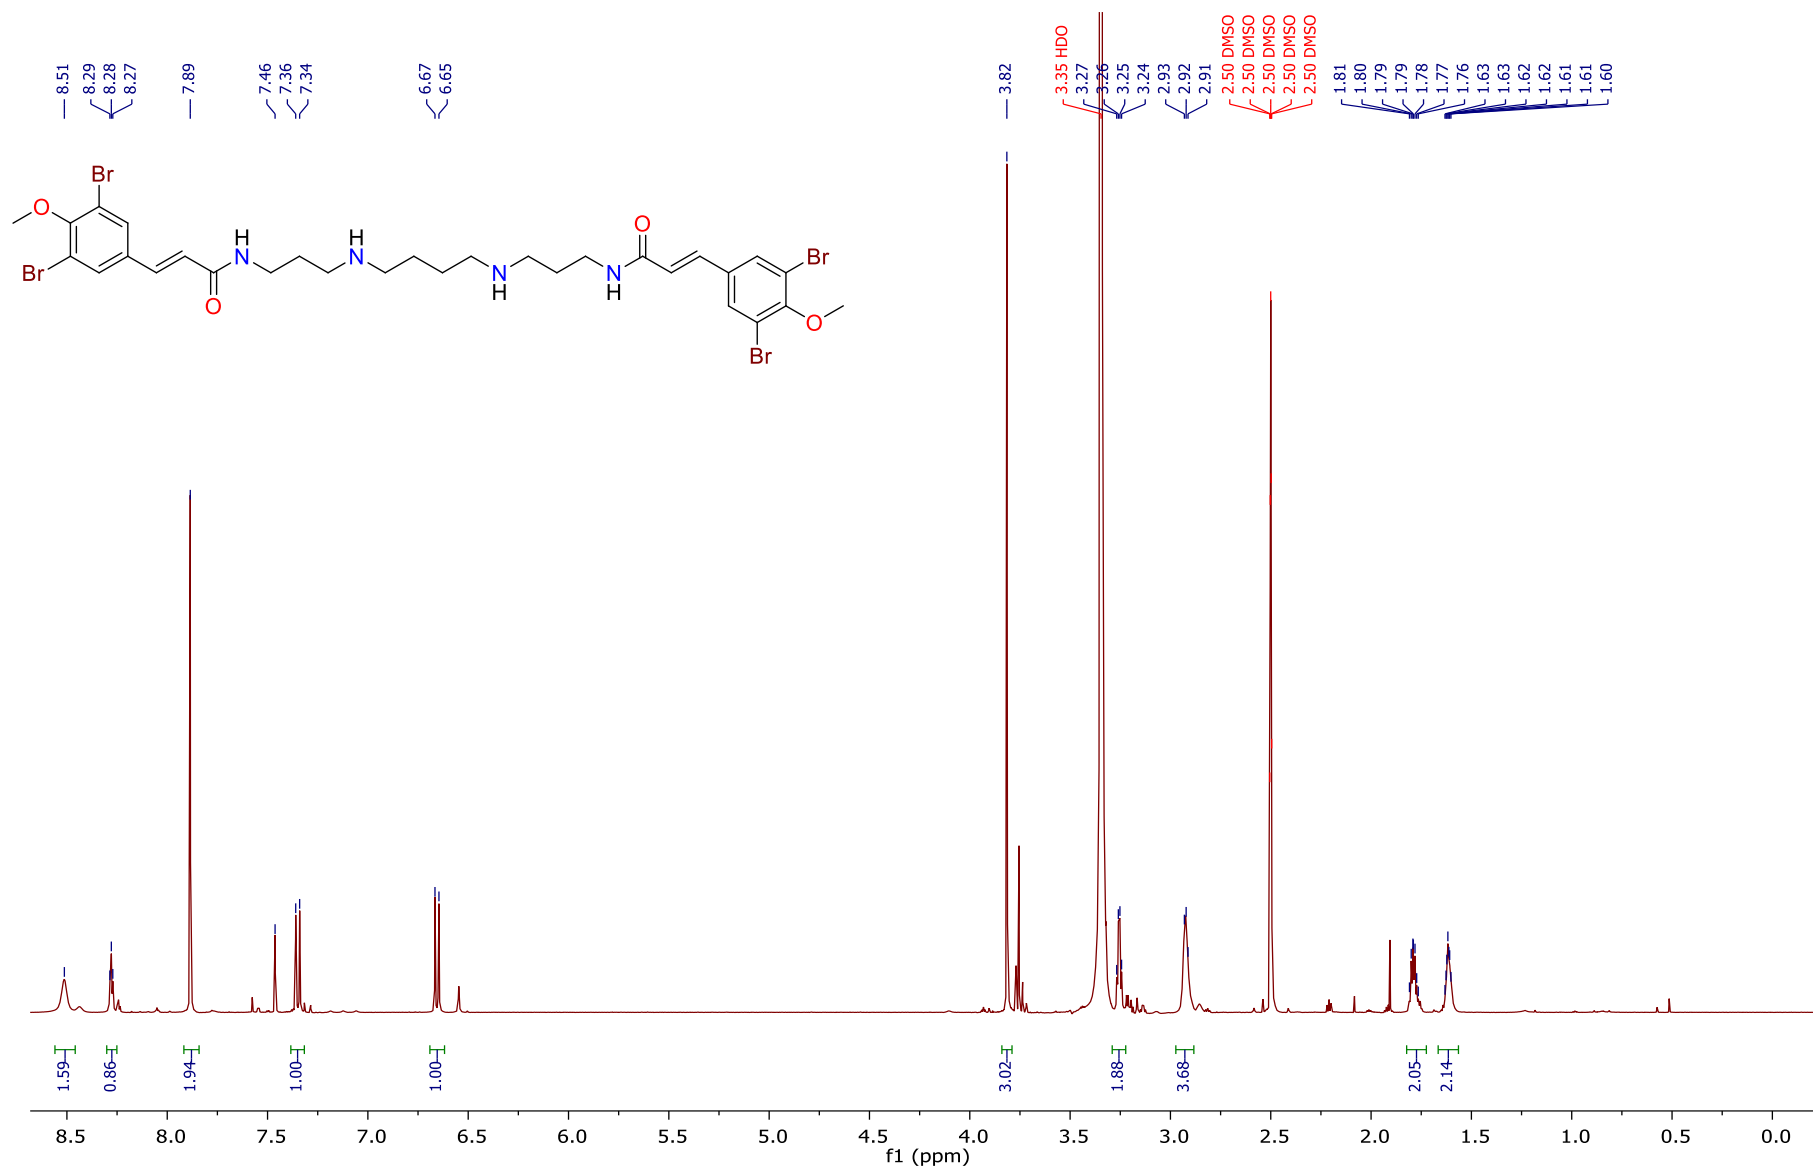

**Figure S27:** <sup>1</sup>H NMR (800 MHz) spectrum of ianthelliformisamine C (**3**) in DMSO-*d*<sub>6</sub>

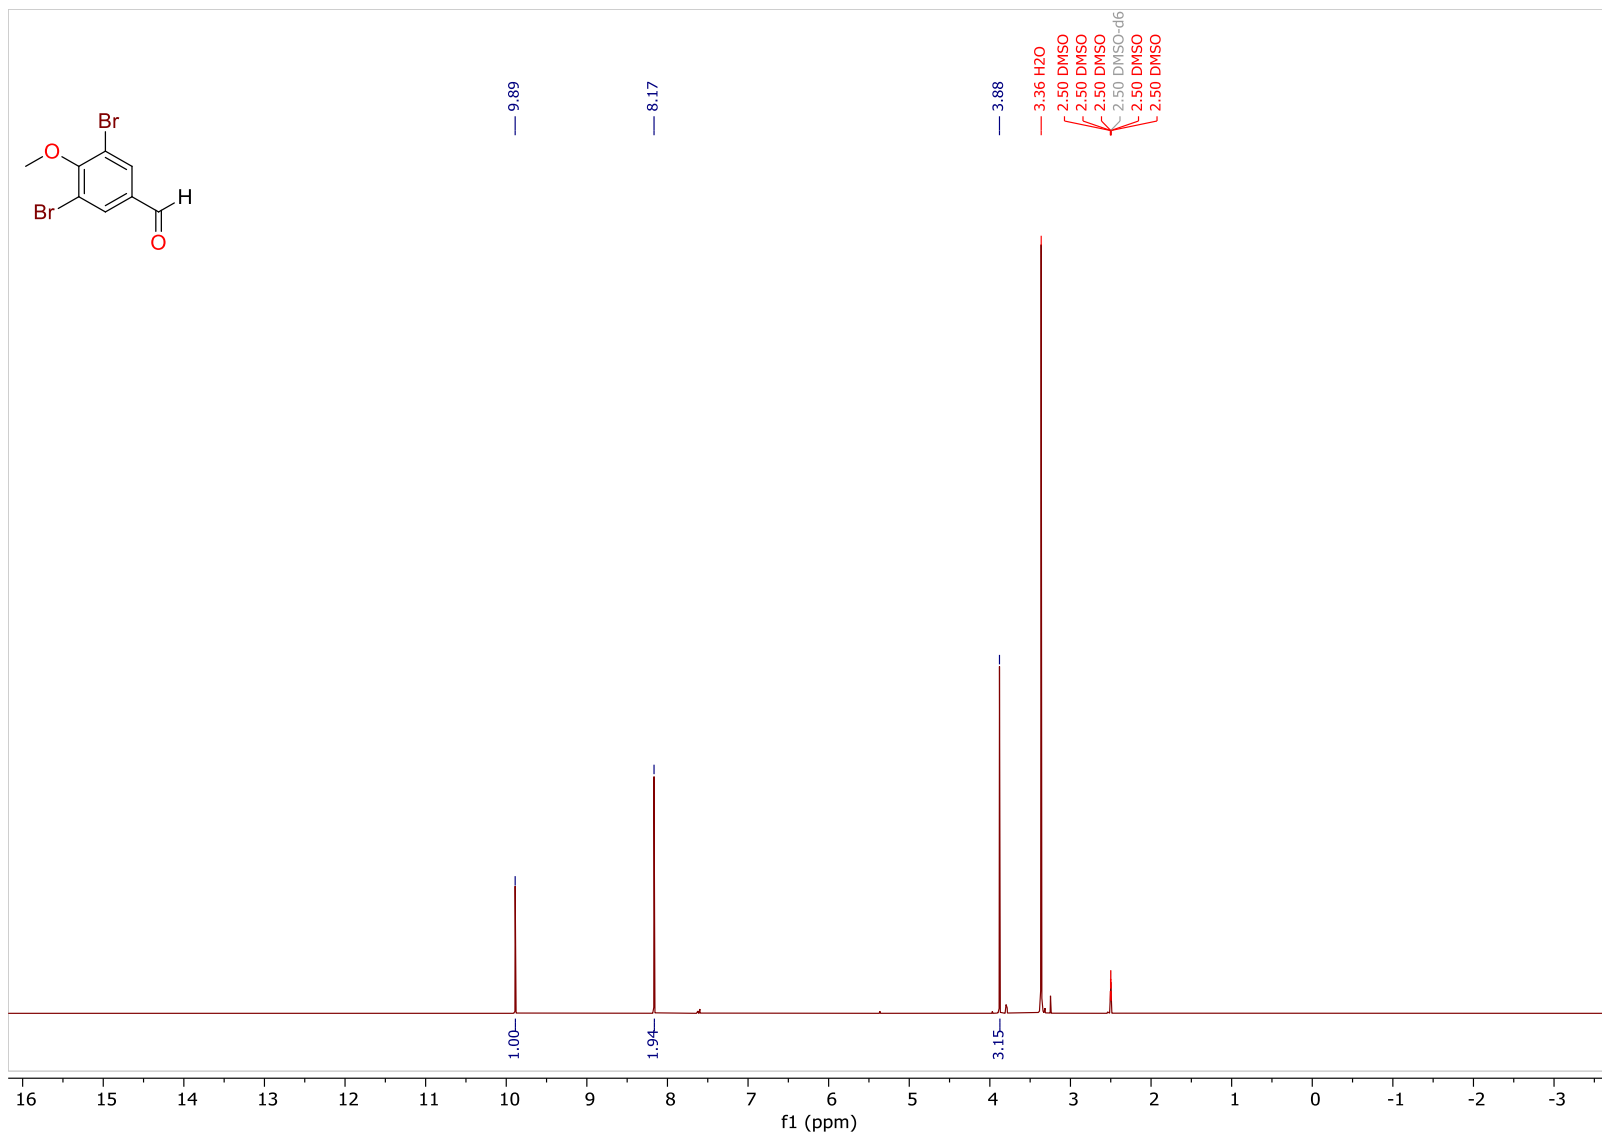

**Figure S28:** <sup>1</sup>H NMR (800 MHz) spectrum of 3,5-dibromo-4-methoxybenzaldehyde (**9**) in DMSO-*d*<sub>6</sub>

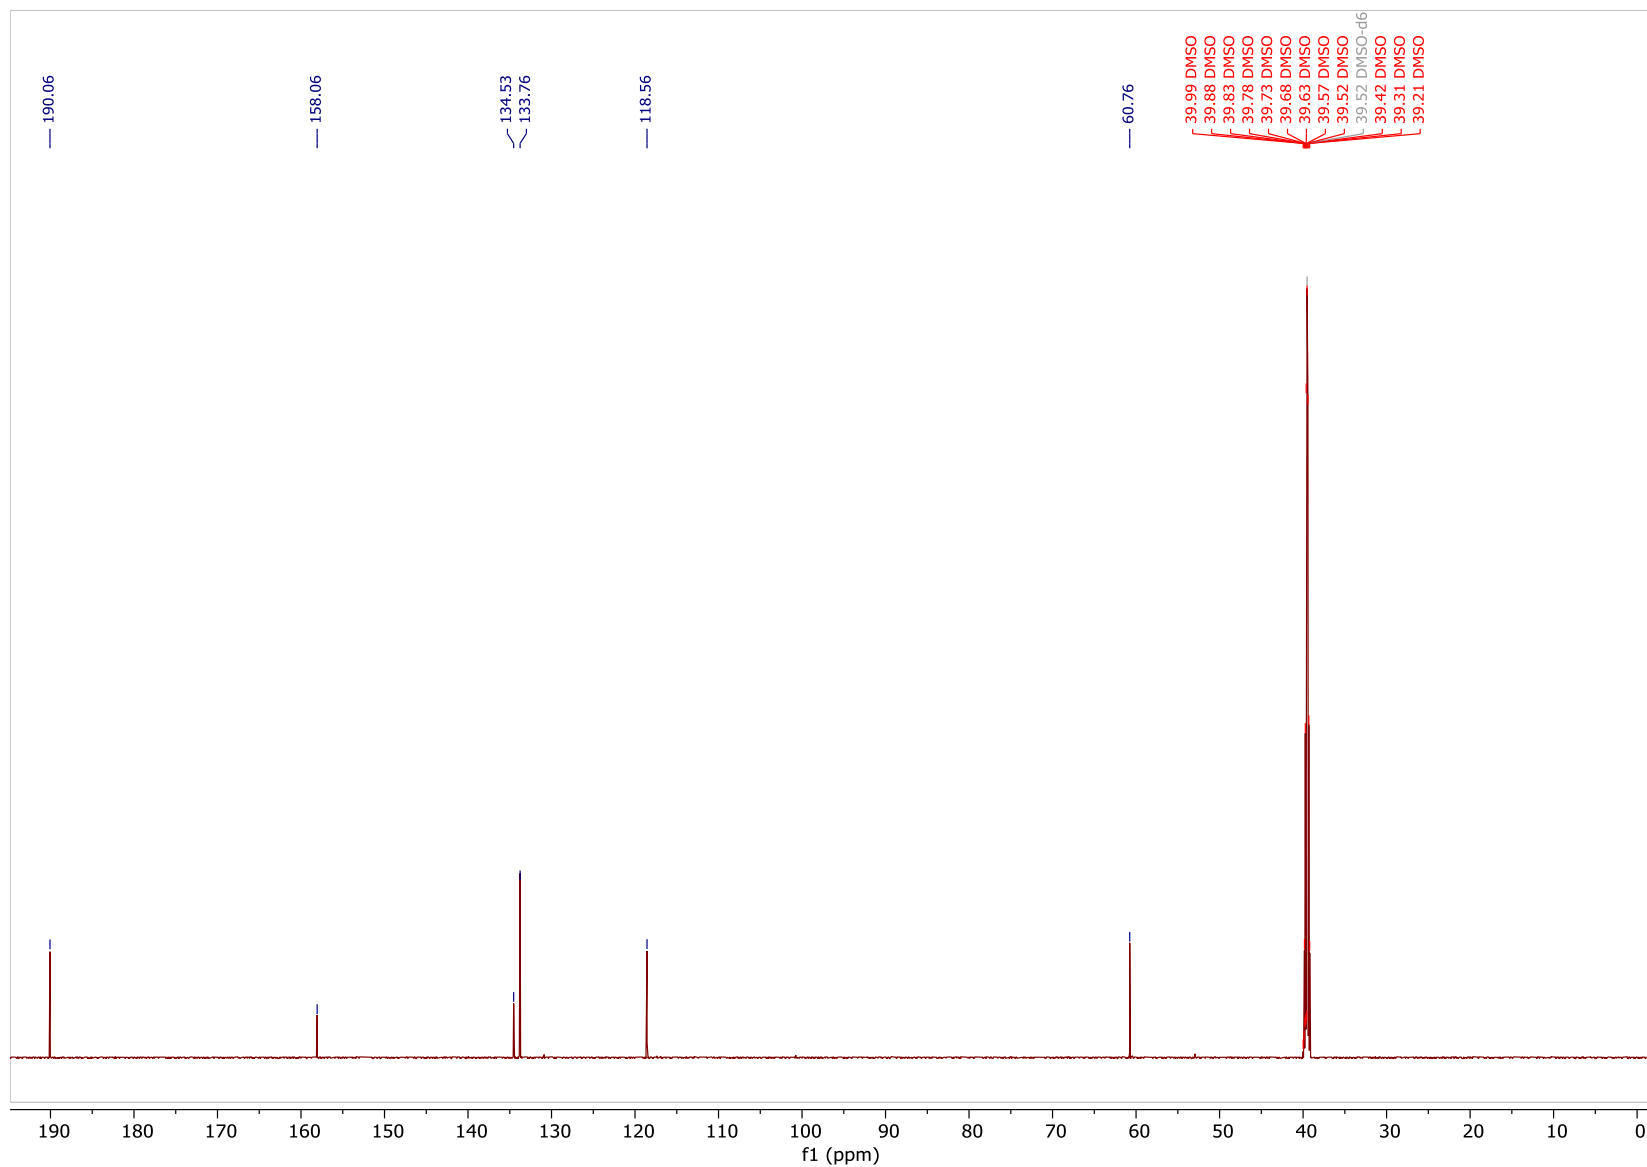

**Figure S29:**  $^{13}\text{C}$  NMR (200 MHz) spectrum of 3,5-dibromo-4-methoxybenzaldehyde (**9**) in DMSO- $d_6$

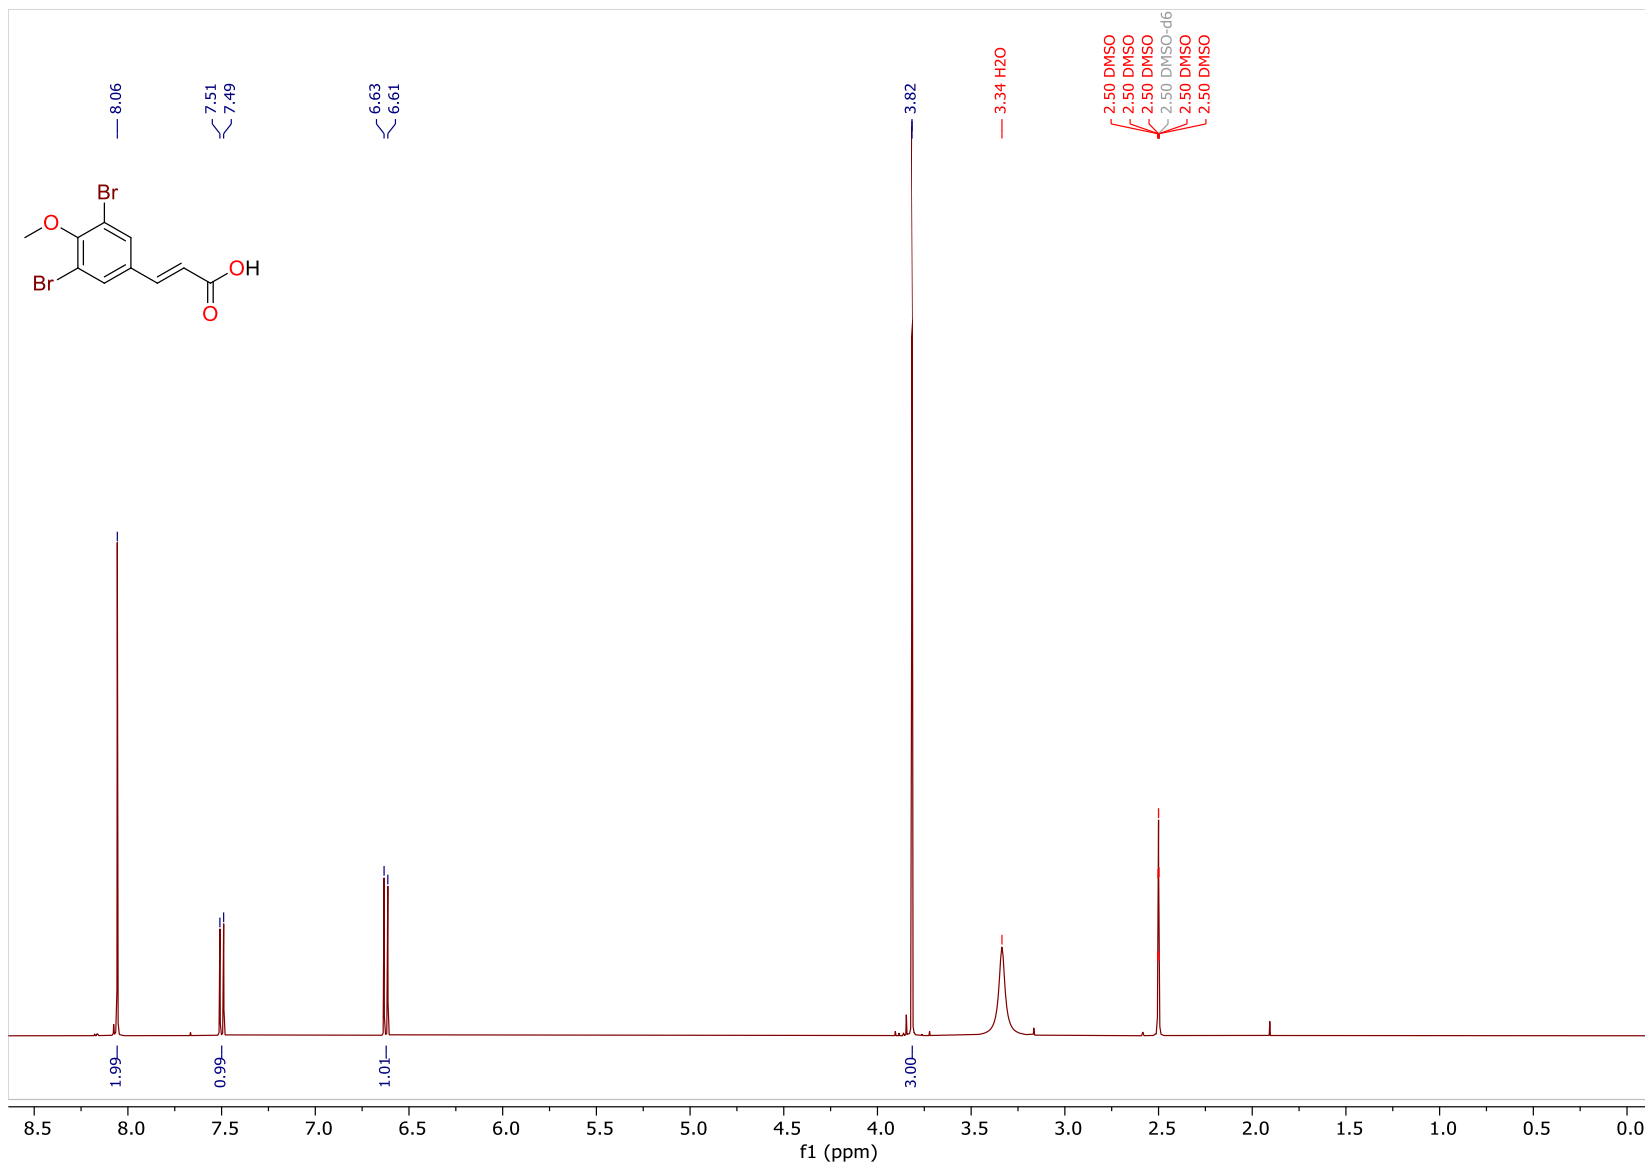

**Figure S30:** <sup>1</sup>H NMR (800 MHz) spectrum of (*E*)-3-(3,5-dibromo-4-methoxyphenyl)acrylic acid (**10**) in DMSO-*d*<sub>6</sub>

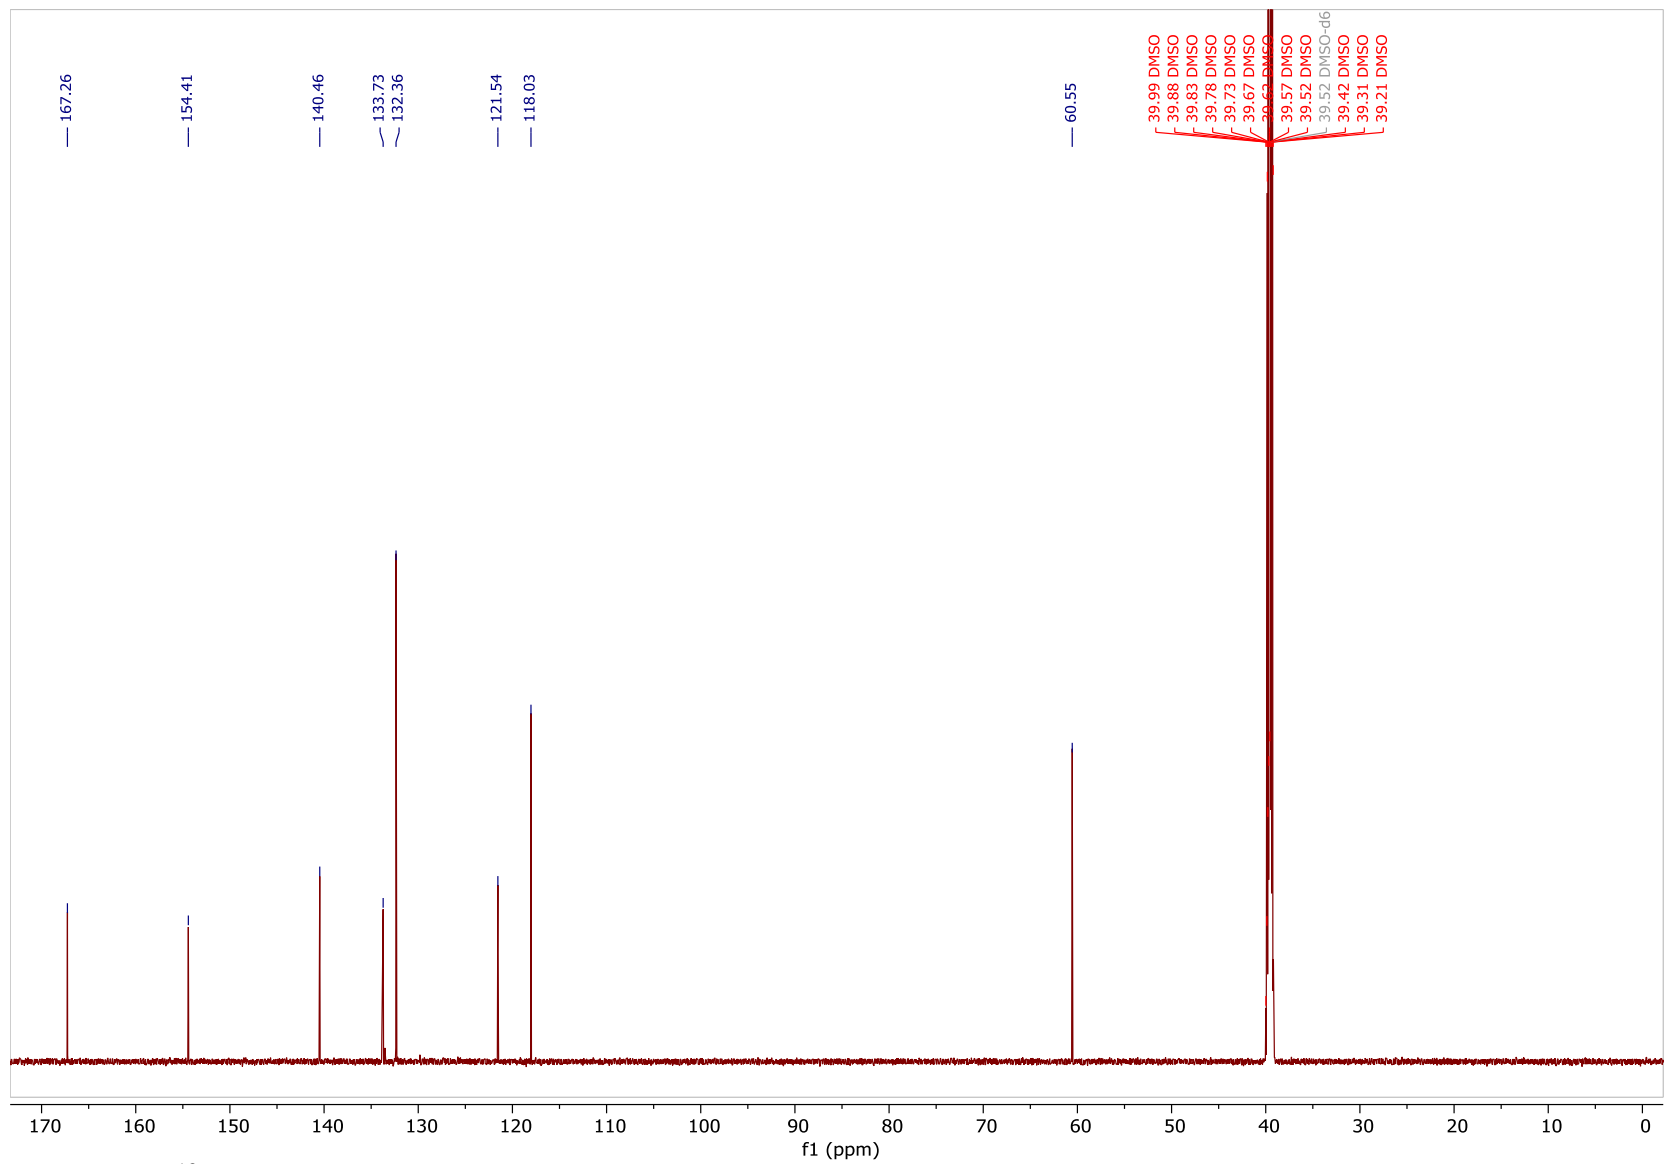

**Figure S31:**  $^{13}\text{C}$  NMR (200 MHz) spectrum of (*E*)-3-(3,5-dibromo-4-methoxyphenyl)acrylic acid (**10**) in  $\text{DMSO-}d_6$

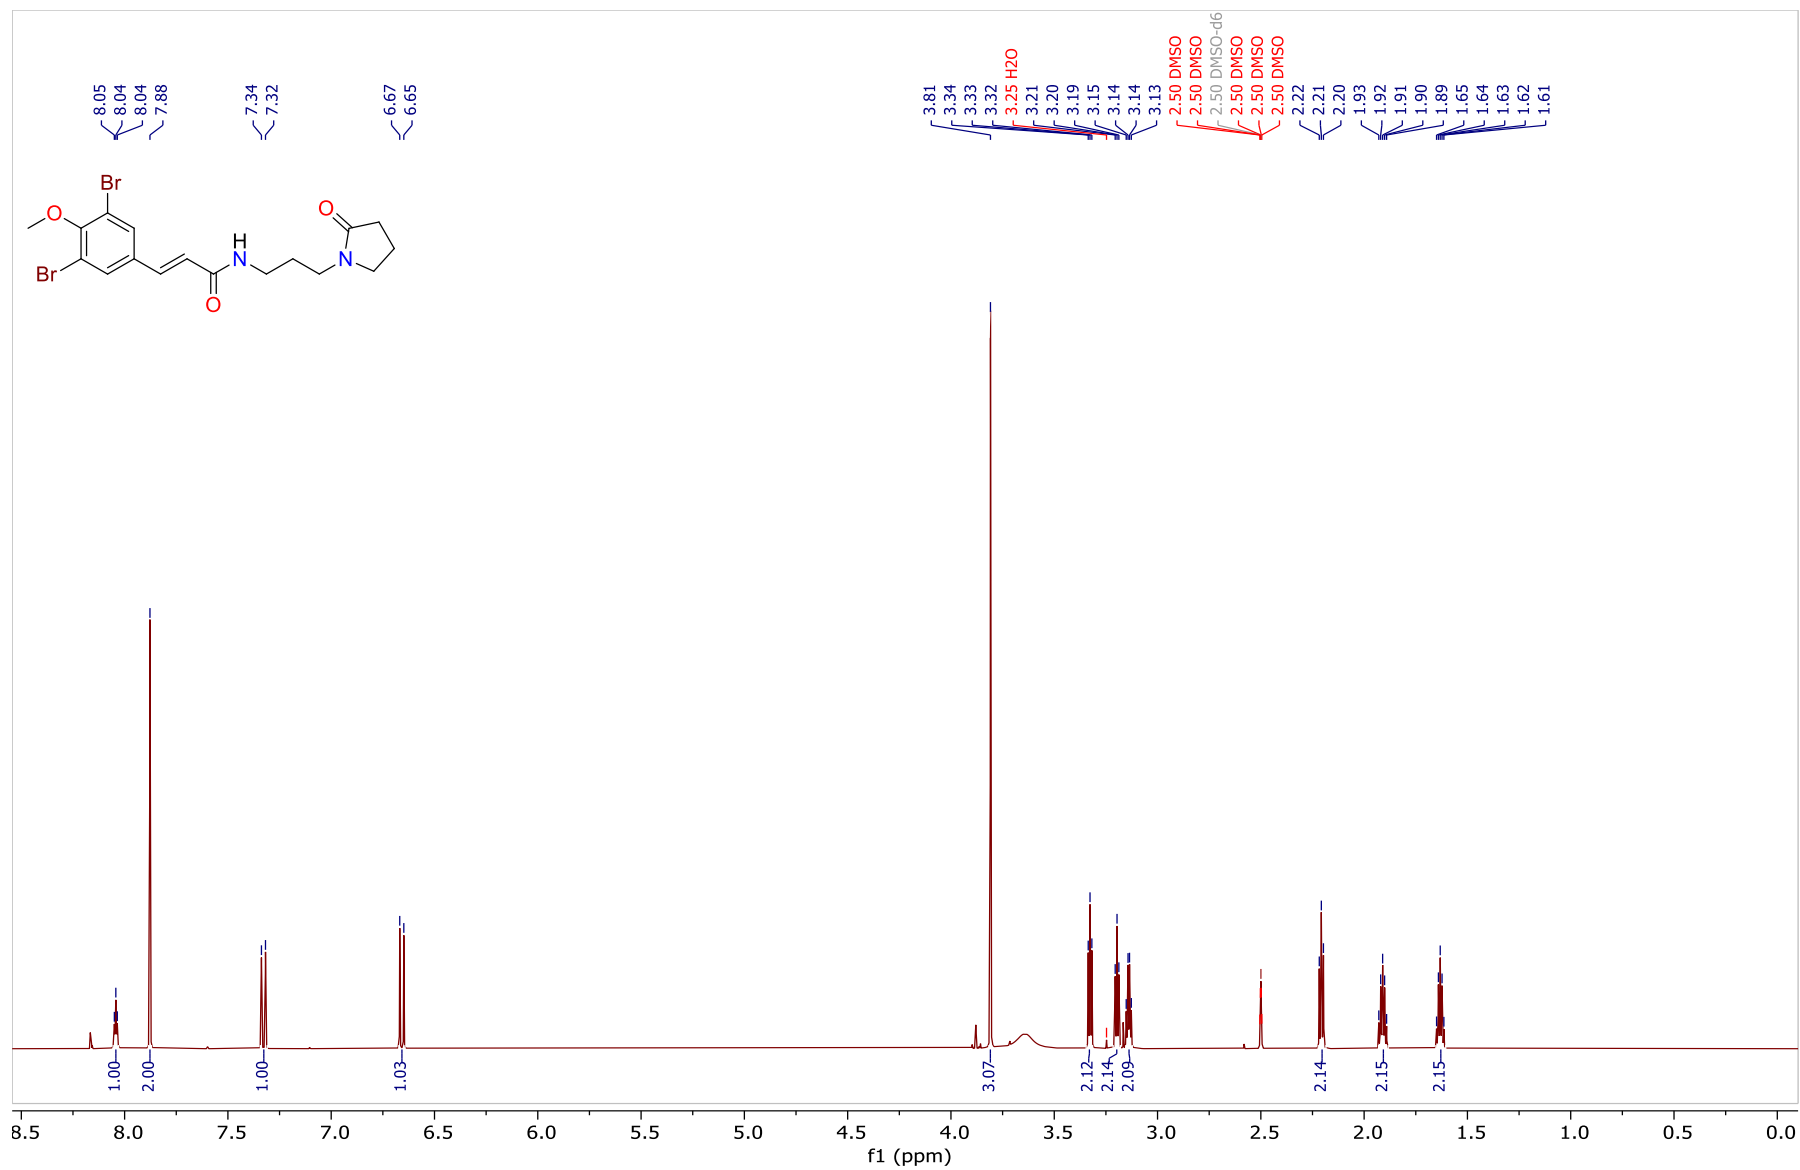

**Figure S32:** <sup>1</sup>H NMR (800 MHz) spectrum of synthetic ianthelliformisamine D (**4**) in DMSO-*d*<sub>6</sub>

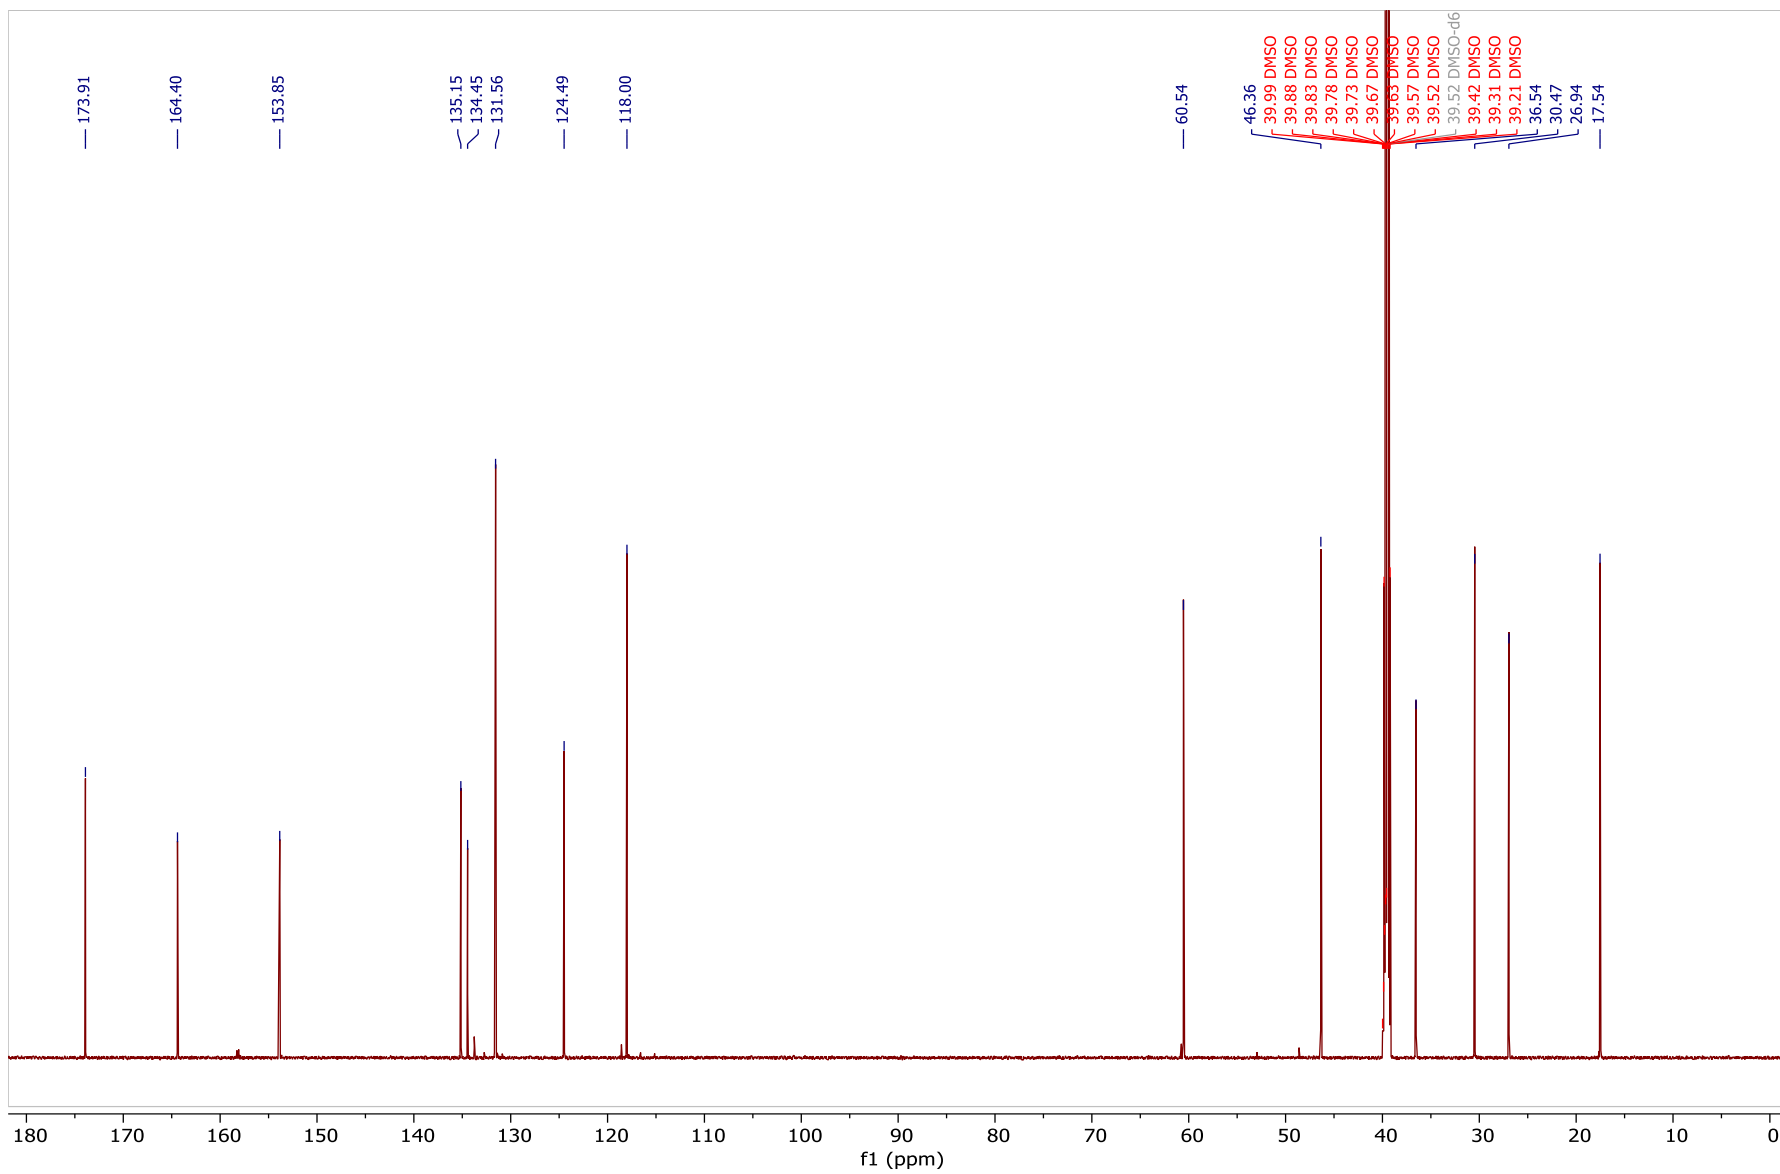

**Figure S33:**  $^{13}\text{C}$  NMR (200 MHz) spectrum of synthetic ianthelliformisamine D (**4**) in  $\text{DMSO-}d_6$



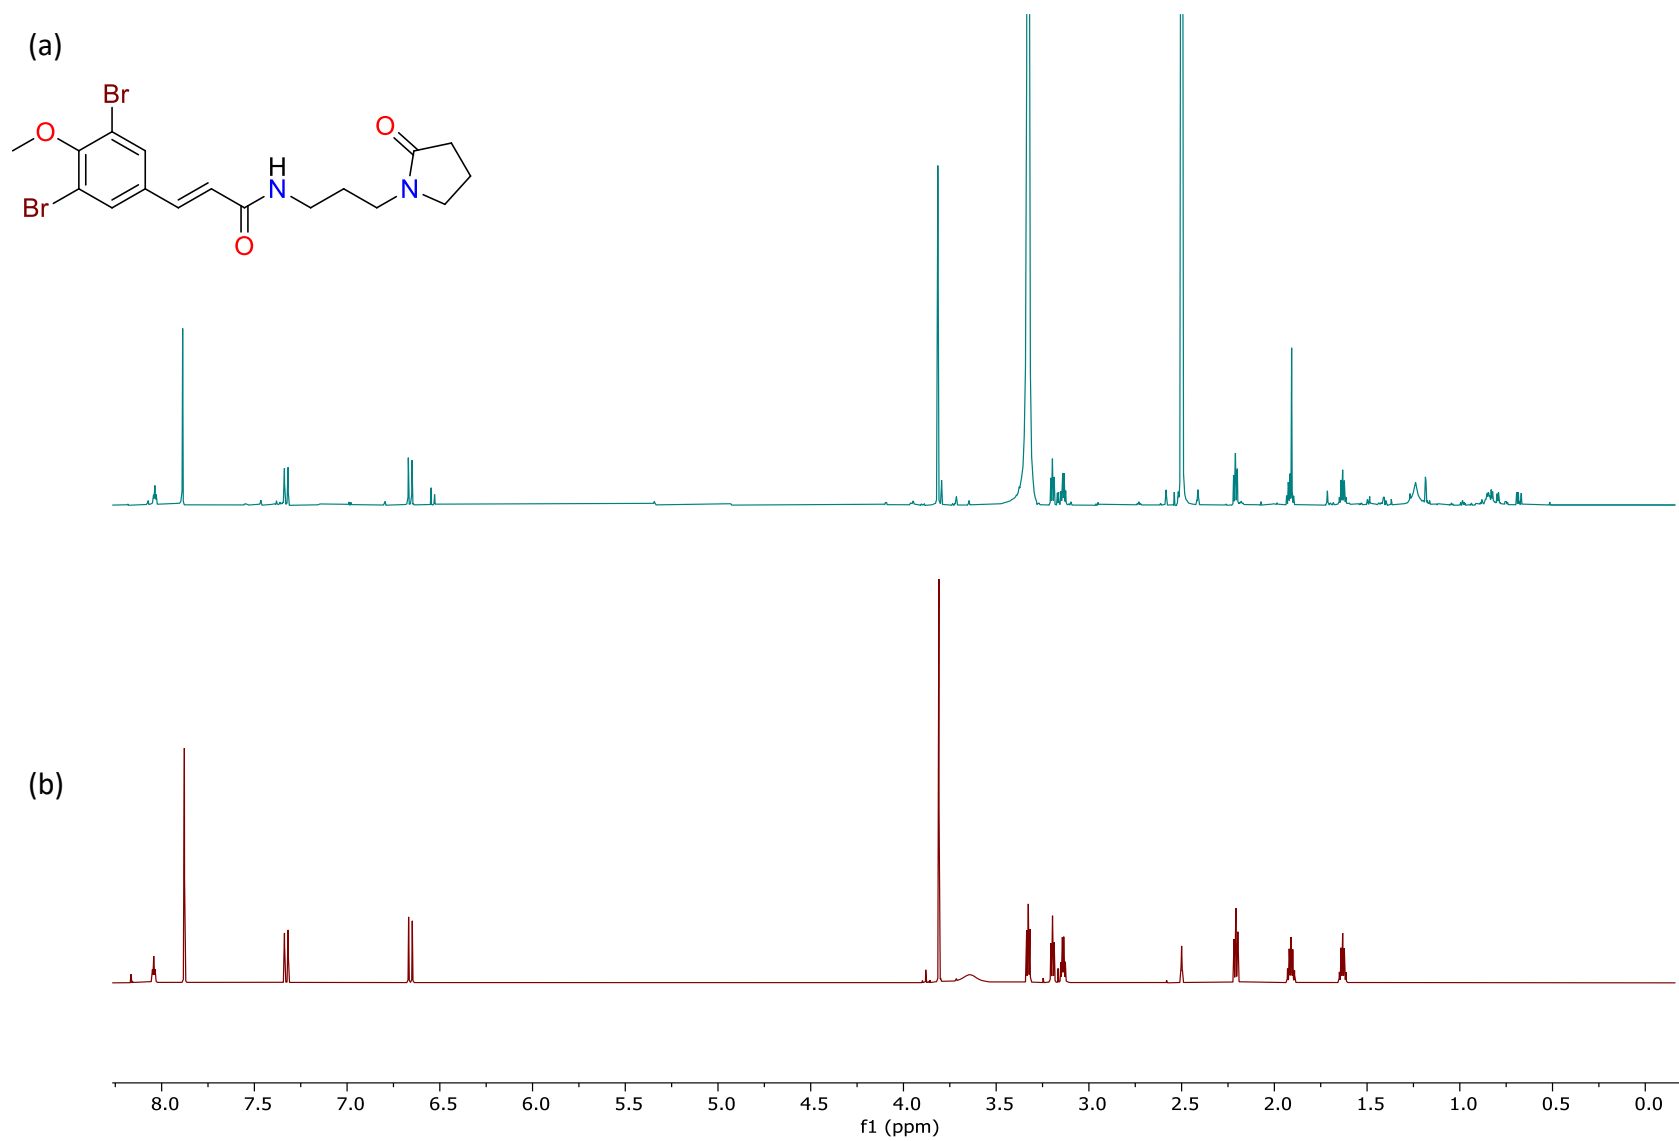

**Figure S34:** Stacked  $^1\text{H}$  NMR (800 MHz) spectra of natural product (a) and synthetic (b), ianthelliformisamine D (**4**) in  $\text{DMSO-}d_6$

(a)

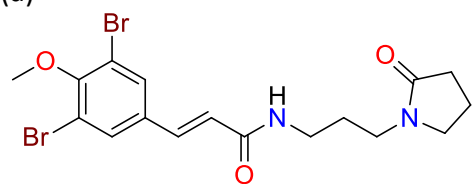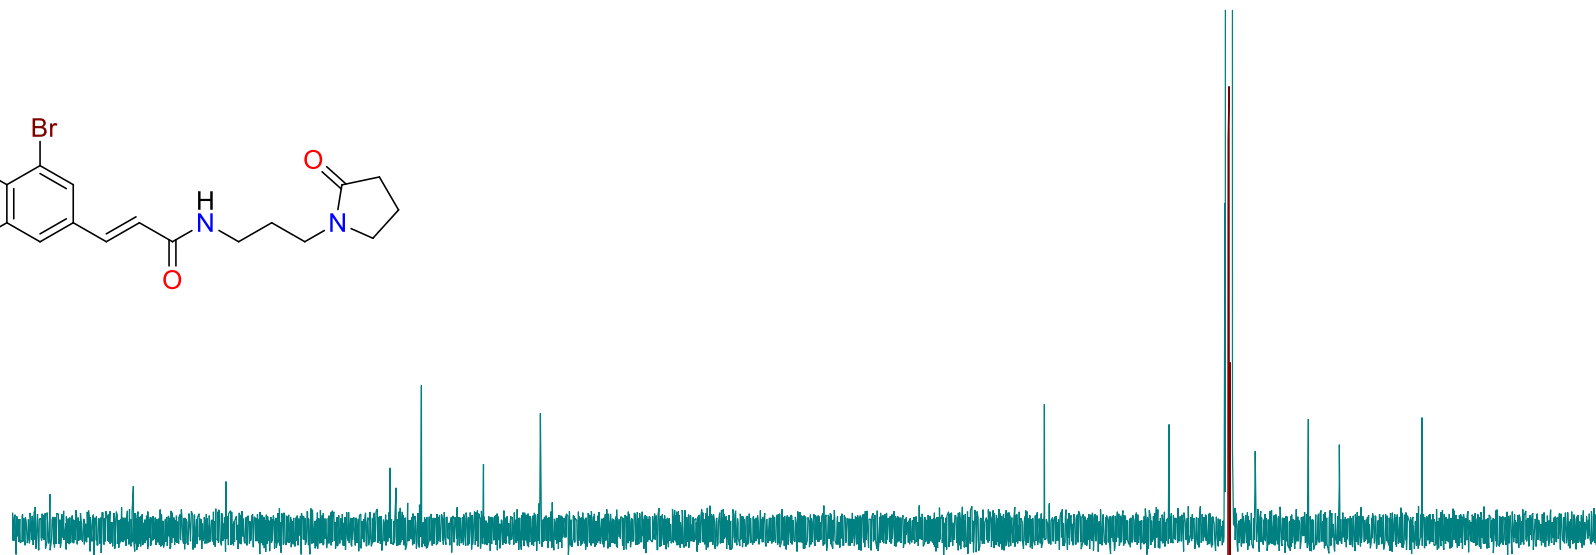

(b)

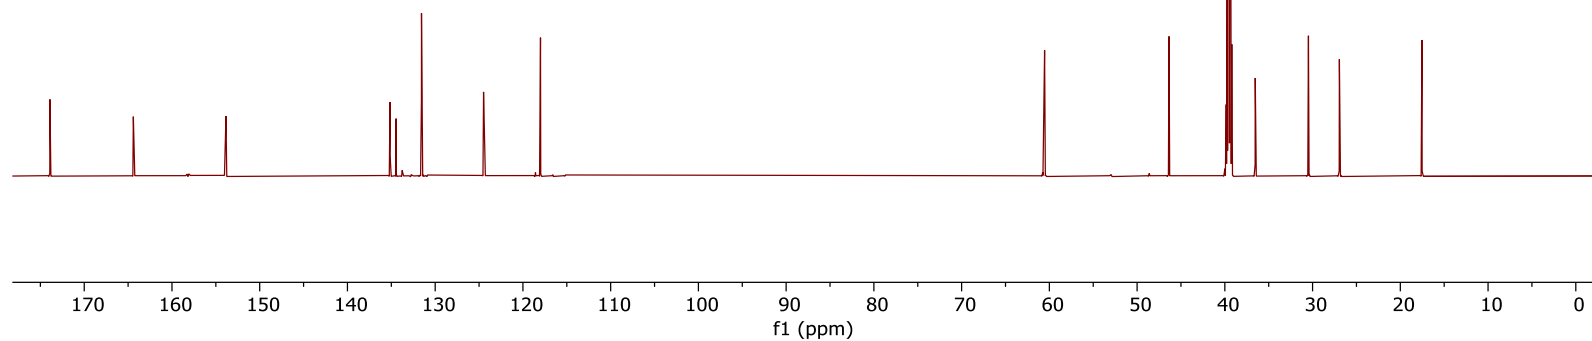

**Figure S35:** Stacked  $^{13}\text{C}$  NMR (200 MHz) spectra of natural product (a) and synthetic (b), ianthelliformisamine D (**4**) in  $\text{DMSO-}d_6$
